# Supplementary material
Source: publisher figshare collection journal article supplement (https://acs.figshare.com/ndownloader/files/20814693)
Supplement: Supplementary file 1 [file 20814693]

# **Efficient and Mild Reductive Amination of Carbonyl Compounds Catalysed by Dual-Function Palladium Nanoparticles**

Xinchun Jv,<sup>a</sup> Shuting Sun,<sup>a</sup> Qun Zhang,<sup>a</sup> Muyao Du,<sup>c</sup> Lan Wang,<sup>a</sup> Bo Wang<sup>\*a,b</sup>

- a. Key Laboratory of Advanced Materials of Tropical Island Resources (Hainan University), Ministry of Education, No. 58, Renmin AVE, Haikou 570228, P.R. China.
- b. School of Chemistry and Environmental Engineering, Shandong University of Science and Technology No. 579, Qianwangang Road, Qingdao 266590, P.R. China.
- c. College of Food Science and Engineering, Shandong Agricultural University, No. 7, Panhe AVE, Tai'an 271017, P.R. China.

\*Corresponding Author. E-mail: wangbo@hainanu.edu.cn; bowang2@kth.se (Prof. B. Wang)

Total number of pages: 54. Total number of figures: 5. Total number of table: 5.

## Table of Contents

|                                                                                    |            |
|------------------------------------------------------------------------------------|------------|
| <b>1. Generals.....</b>                                                            | <b>S3</b>  |
| <b>2. General procedure for the synthesis Pd-Ligands .....</b>                     | <b>S4</b>  |
| <b>3. Optimization of conditions for reductive amination of benzaldehyde .....</b> | <b>S5</b>  |
| <b>4. General procedure for reductive amination of ketones/aldehydes.....</b>      | <b>S5</b>  |
| <b>5. General procedure for the preparation of imines.....</b>                     | <b>S5</b>  |
| <b>6. General procedure for hydrogenation of imines .....</b>                      | <b>S6</b>  |
| <b>7. Elemental analysis and ICP-OES of Pd-NPs.....</b>                            | <b>S6</b>  |
| <b>8. FT-IR of the Pd-NPs .....</b>                                                | <b>S6</b>  |
| <b>9. Recycling of Pd-NPs.....</b>                                                 | <b>S7</b>  |
| <b>10. Calculation of TOF and TON .....</b>                                        | <b>S8</b>  |
| <b>11. Quantum chemical calculations .....</b>                                     | <b>S11</b> |
| <b>12. Characterization data for all products.....</b>                             | <b>S15</b> |
| <b>13. The control reactions and MS spectra .....</b>                              | <b>S21</b> |
| <b>14. <sup>1</sup>H NMR and <sup>13</sup>C NMR spectra of products.....</b>       | <b>S22</b> |
| <b>15. References .....</b>                                                        | <b>S54</b> |

## 1. Generals

All chemicals are commercially available and were purchased from Aladdin (Shanghai, China), and used as received without any further purification. All chemicals used were of analytical grade.  $^1\text{H}$  NMR and  $^{13}\text{C}$  NMR spectrum were recorded on a Bruker Avance-400 instrument, 400 MHz for  $^1\text{H}$  NMR and 100 MHz for  $^{13}\text{C}$  NMR, with  $\text{CDCl}_3$  or  $\text{DMSO}-d_6$  or  $\text{CD}_3\text{OD}-d_4$  as solvent in all cases. All chemical shifts ( $\delta$ ) were quoted in parts per million (ppm) and reported relative to an internal tetramethylsilane (TMS,  $\delta$  0.00) standard. The following abbreviations were used to explain the multiplicities: *s* = singlet, *d* = doublet, *t* = triplet, *q* = quartet, *m* = multiplet. Yields of some products were measured by HPLC analysis using a SHIMADZU instrument equipped with a Wonda Sil C18-WR column (5  $\mu\text{m}$ ). Yields of some other products were measured by GC analysis using FULI 9790II instrument equipped with a DB-624 capillary column (30 m 1.4  $\mu\text{m}$   $\times$  0.25 mm). EI mass spectra were measured on SHIMADZU QP2020 spectrometer.

The High-Resolution Transmission Electron Microscope (HRTEM) measurements were performed using a JEM 2100F microscope. The samples were dispersed in ethanol with ultrasonic for 5 min and then dropped onto a carbon film on copper grid. And the instrument was operated at 200 kV. Inductively coupled plasma-optical emission spectrometer (ICP-OES) from Perkin Elmer Nexion 300 was used to identify the Pd content of the nanoparticles. Samples were prepared by digesting 10 mg of nanoparticles in 2.0 mL of  $\text{H}_2\text{O}_2$  and 8 ml aqua regia using constant temperature drying oven for 3 hours. The solutions were made up to 50 mL in standard flask and start to detect Pd. X-ray diffraction (XRD) patterns was collected from  $5^\circ$  to  $90^\circ$  with a step of 0.02 on a Bruker D 8 Advance diffractometer with Cu K $\alpha$  radiation ( $\lambda = 1.5418 \text{ \AA}$ ) and a Lynxeye one-dimensional detector. Elemental analysis (EA) measurement was performed using the Flash 2000. X-Ray photoelectron spectroscopy (XPS) measurements were obtained in ultra-high vacuum (base pressure of  $1 \times 10^{-10}$  mbar) equipped with an Al source (K $\alpha$  radiation of 1486.6 eV) and an Escalab 250Xi analyser at  $53^\circ$  detection angle. The number of active atoms were determined by chemisorption analysis of hydrogen under  $50^\circ\text{C}$  using AutoChem II 2920.

## 2. General procedure for the synthesis Pd-Ligands

The catalyst Pd-ligands were prepared following the procedure: To a mixed solution of the ligands of 0.1 mmol (**Figure S1**) and  $\text{HBF}_4$  (40%, 1 ml), sodium nitrite (0.2 mmol) dissolved in 1 ml ultrapure water was drop wised, stirred at  $0^\circ\text{C}$  for 1 h, the generated white solid was filtered and introduced to a

mixed solution by toluene of 1 ml, ultrapure water of 2 ml and  $K_2PdCl_4$  of 0.08 mmol, the resulted mixture was stirred for another 1 h.  $NaBH_4$  (0.6 mmol) dissolved in water (1 ml) was dropped at *rt* to the mixture and incubated for 2 h. The solution was centrifuged to remove the aqueous phase, the resulted solid was washed with  $H_2SO_4$  (0.5M) three times and then was mixed with ethanol, sonicated for 5 min, and centrifuged to remove ethanol, the solid was dried to provide Pd-Ligands.

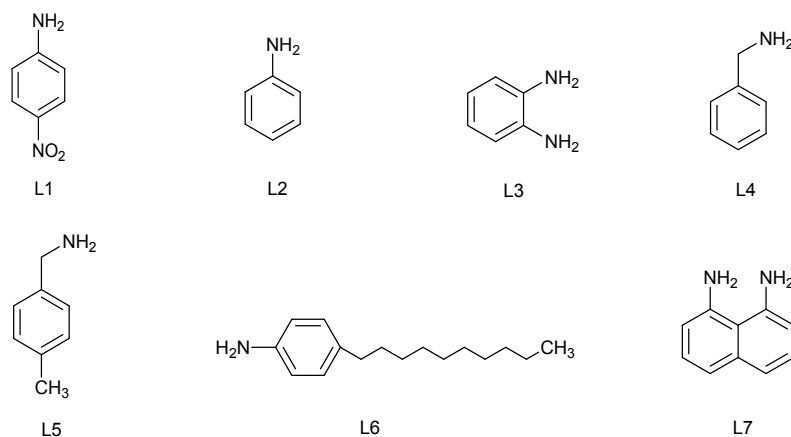

**Figure S1.** Structure of varied ligands

### 3. Optimization of conditions for reductive amination of benzaldehyde

Benzaldehyde (0.05 mmol), ammonia water or ammonium salts (0.2 mmol) and catalysts (Pd-(L1-L7)) (2.0 mg) were taken in an oven dried reaction bottle (25 ml) equipped with magnetic pellet.  $H_2O$  (10 ml, different pH varying from 1.0 to 7.0) were added to the reaction tube and the reaction mixture was stirred at room temperature, 60°C, 80°C with  $H_2$  balloon. The reaction was monitored by TLC. The reaction conversions and yields were determined by HPLC analysis equipped with a C18 reverse column. Among all the tested conditions, the best one is: amine source, ammonia water; catalyst, Pd-L5; pH, 2.0; temperature, *rt*.

### 4. General procedure for reductive amination of ketones/aldehydes

Ketone or aldehyde (0.05 mmol), ammonia water (0.2 mmol) and Pd-NPs (2.0 mg, 13 mol%) were taken in an oven dried reaction bottle (25 ml) equipped with magnetic pellet.  $H_2O$  (10 ml, pH = 2.0) were added to the reaction tube and the reaction mixture was stirred at room temperature with  $H_2$  balloon. The reaction was monitored by TLC. The reaction conversions and yields were determined by HPLC

analysis equipped with a C18 reverse column. When the substrate completely consumed, the reaction was stopped and then the solution was extracted with saturated salt water and ethyl acetate (3×10 ml). The organic phase was dried by using Na<sub>2</sub>SO<sub>4</sub> and concentrated in vacuum. The crude product was purified by column chromatography using silica gel. The products were characterized with NMR (Due to the small scales of the reactions, we combined the products of several runs to get higher concentration samples).

## 5. General procedure for the preparation of imines

A round-bottomed flask (25 ml) was charged with a 3M ammonia water in methanol (10 ml) and then ketone or aldehyde (4 mmol) was added dropwise over time increments of 5 minutes at ambient temperature. After the addition was complete, the reaction mixture was left stirring for 24 h at 20 °C. The precipitate formed was filtered and washed with hexane and, finally, dried at room temperature to give imine.<sup>1,2</sup>

## 6. General procedure for hydrogenation of imines

Crude product of imine (0.05 mmol) and Pd-NPs (2.0 mg, 13 mol%) were taken in an oven dried reaction bottle (25 ml) equipped with magnetic pellet. H<sub>2</sub>O (10 ml, pH = 2.0) were added to the reaction tube and the reaction mixture was stirred at room temperature with H<sub>2</sub> balloon. The reaction was monitored by TLC. The reaction conversions and yields were determined by HPLC analysis equipped with a C18 reverse column. When the substrate completely consumed, the reaction was stopped and then the solution was extracted with saturated salt water and ethyl acetate (3×10 ml). The organic phase was dried by using Na<sub>2</sub>SO<sub>4</sub> and concentrated in vacuum. The crude product was purified by column chromatography using silica gel. The products were characterized with NMR (Due to the small scales of the reactions, we combined the products of several runs to get higher concentration samples).

## 7. Elemental analysis and ICP-OES of Pd-NPs

**Table S1.** Elemental analysis and ICP-OES of Pd-L5

| Content (wt %) |
|----------------|
|----------------|

| C <sup>a</sup> | H <sup>a</sup> | N <sup>a</sup> | Pd <sup>b</sup> |
|----------------|----------------|----------------|-----------------|
| 30.09          | 2.76           | 4.45           | 35.61           |

<sup>a</sup> Measured by elemental analysis (EA).

<sup>b</sup> Measured by inductively coupled plasma-optical emission spectrometer (ICP-OES).

## 8. FT-IR of the Pd-NPs

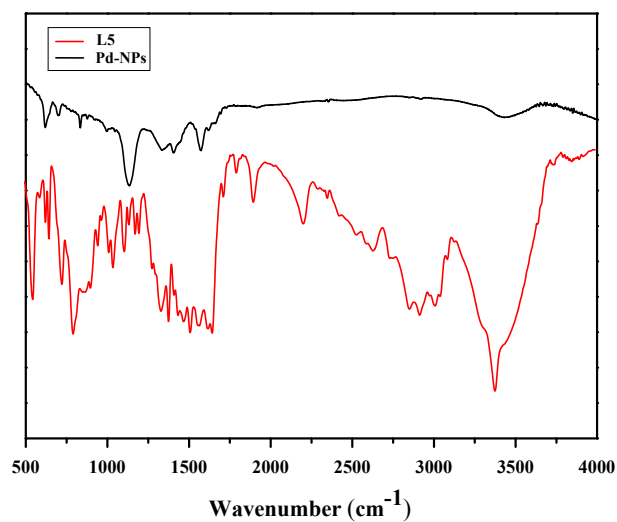

**Figure S2.** FTIR of Pd-NPs

## 9. Recycling of Pd-NPs

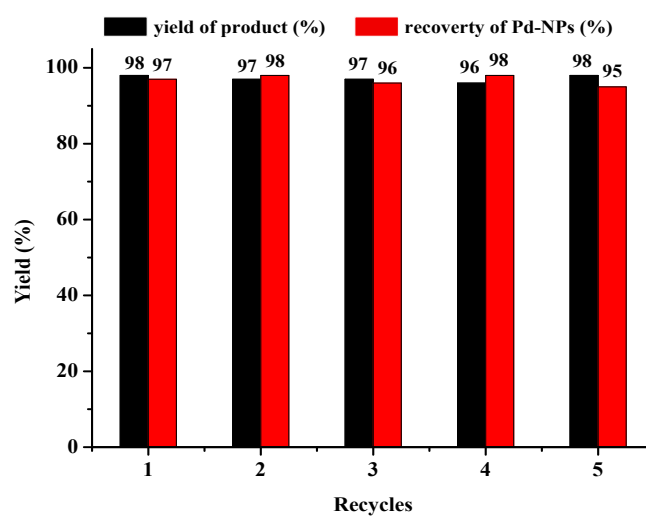

**Figure S3.** Recycles and reused of Pd-NPs

After the successful utilization of stable Pd-NPs catalyst for the reductive amination of derivatived aldehydes/ketones in water, the recoverability and recyclability of Pd-NPs were investigated on one-pot reductive amination of benzaldehyde and ammonia under optimized reaction condition. After completed the reaction, the reaction mixture was centrifuged, and the solution was removed. The obtained solid was washed with ethanol and dried under vacuum, the catalyst was successfully recovered and reused for the next four cycles with little loss (**Figure S3**). After the fifth catalytic cycle of reductive amination, the catalyst was analyzed by HRTEM and showed that Pd-NPs was uniform distribution without any apparent agglomeration (**Figure S4**).

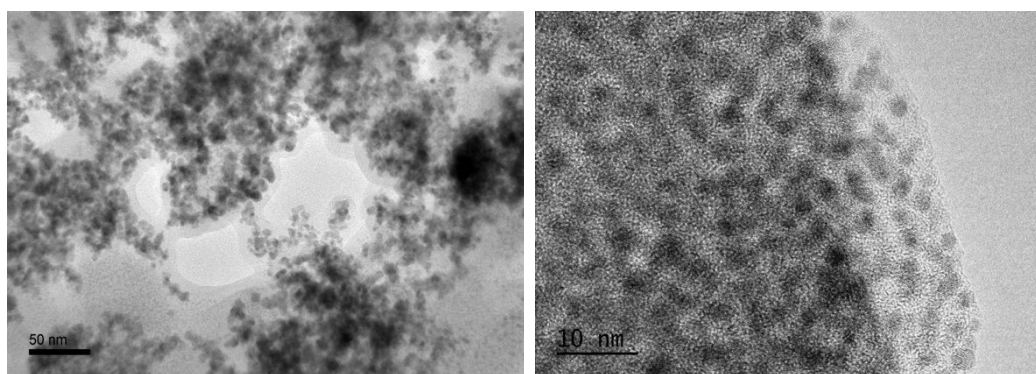

**Figure S4.** HRTEM image of Pd-NPs after five catalytic cycles

## 10. Calculation of TOF and TON

**Table S2.** Reductive amination of aldehydes

| $\text{R}-\text{CHO} \xrightarrow[\text{H}_2\text{O, pH} = 2.0, \text{rt}]{\text{PdNPs/NH}_3/\text{H}_2 (1\text{atm})} \text{R}-\text{CH}_2\text{NH}_2$ |          |                 |     |       |          |                                               |     |
|---------------------------------------------------------------------------------------------------------------------------------------------------------|----------|-----------------|-----|-------|----------|-----------------------------------------------|-----|
| Entry                                                                                                                                                   | Aldehyde | Amine source    | TON | Entry | Aldehyde | Amine source                                  | TON |
| 1                                                                                                                                                       |          | NH <sub>3</sub> | 372 | 15    |          | NH <sub>3</sub>                               | 378 |
| 2                                                                                                                                                       |          | NH <sub>3</sub> | 340 | 16    |          | NH <sub>3</sub>                               | 303 |
| 3                                                                                                                                                       |          | NH <sub>3</sub> | 351 | 17    |          | NH <sub>3</sub>                               | 389 |
| 4                                                                                                                                                       |          | NH <sub>3</sub> | 361 | 18    |          | C <sub>2</sub> H <sub>5</sub> NH <sub>2</sub> | 497 |
| 5                                                                                                                                                       |          | NH <sub>3</sub> | 319 | 19    |          | C <sub>2</sub> H <sub>5</sub> NH <sub>2</sub> | 483 |
| 6                                                                                                                                                       |          | NH <sub>3</sub> | 383 | 20    |          | C <sub>2</sub> H <sub>5</sub> NH <sub>2</sub> | 484 |

|    |                  |                 |     |    |                                                                                    |                                               |     |
|----|------------------|-----------------|-----|----|------------------------------------------------------------------------------------|-----------------------------------------------|-----|
| 7  | R = <i>p</i> -Br | NH <sub>3</sub> | 21  | 21 |  | C <sub>2</sub> H <sub>5</sub> NH <sub>2</sub> | 463 |
| 8  | R = <i>o</i> -Cl | NH <sub>3</sub> | 22  | 22 |  | C <sub>2</sub> H <sub>5</sub> NH <sub>2</sub> | 472 |
| 9  | R = <i>m</i> -Br | NH <sub>3</sub> | 276 | 23 | n-C <sub>3</sub> H <sub>7</sub> CHO                                                | PhNH <sub>2</sub>                             | 277 |
| 10 | R = <i>o</i> -Br | NH <sub>3</sub> | 319 | 24 | n-C <sub>3</sub> H <sub>7</sub> CHO                                                | NH <sub>3</sub>                               | 290 |
| 11 | R = <i>p</i> -Cl | NH <sub>3</sub> | 361 | 25 |  | NH <sub>3</sub>                               | 300 |
| 12 | R = <i>m</i> -Cl | NH <sub>3</sub> | 286 | 26 |  | NH <sub>3</sub>                               | 368 |
| 13 | R = <i>o</i> -I  | NH <sub>3</sub> | 368 | 27 |  | NH <sub>3</sub>                               | 315 |
| 14 | R = <i>p</i> -I  | NH <sub>3</sub> | 376 | 28 |  | NH <sub>3</sub>                               | 301 |

Reaction conditions: aldehyde, 0.05 mmol; 0.2mmol ammonia in water; Pd-NPs, 2.0mg; H<sub>2</sub>O, 10ml, H<sub>2</sub> filled in a balloon; reaction time, 3h; Temperature, rt; pH of the reaction medium was made at 2.0; Yields were determined by HPLC analysis equipped with a C18 reverse column. TOF was calculated by mmol of product formed per mmol of the available active sites of Pd (as determined by the chemisorption analysis) for the used catalyst. TON=TOF\*0.5h.

**Table S3.** Reductive amination of ketones

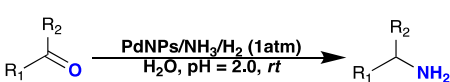

| Entry | Ketone                                                                              | Amine source    | TON | Entry | Ketone           | Amine source                                                                          | TON             |     |
|-------|-------------------------------------------------------------------------------------|-----------------|-----|-------|------------------|---------------------------------------------------------------------------------------|-----------------|-----|
| 1     |  | NH <sub>3</sub> | 318 | 11    | R = <i>m</i> -Cl | NH <sub>3</sub>                                                                       | 231             |     |
| 2     |  | NH <sub>3</sub> | 202 | 12    | R = <i>m</i> -Br | NH <sub>3</sub>                                                                       | 255             |     |
| 3     |  | NH <sub>3</sub> | 297 | 13    | R = <i>o</i> -Cl |  | NH <sub>3</sub> | 248 |
| 4     |  | NH <sub>3</sub> | 308 | 14    | R = <i>o</i> -Br | NH <sub>3</sub>                                                                       | 250             |     |
| 5     |  | NH <sub>3</sub> | 276 | 15    | R = <i>o</i> -I  | NH <sub>3</sub>                                                                       | 238             |     |
| 6     |  | NH <sub>3</sub> | 255 | 16    | R = <i>p</i> -I  | NH <sub>3</sub>                                                                       | 296             |     |



|    |                                                                                   |                 |     |    |                                                                                    |                                               |     |
|----|-----------------------------------------------------------------------------------|-----------------|-----|----|------------------------------------------------------------------------------------|-----------------------------------------------|-----|
| 7  |  | NH <sub>3</sub> | 249 | 17 |  | C <sub>2</sub> H <sub>5</sub> NH <sub>2</sub> | 335 |
| 8  | R = H                                                                             | NH <sub>3</sub> | 297 | 18 |  | C <sub>2</sub> H <sub>5</sub> NH <sub>2</sub> | 320 |
| 9  | R = <i>p</i> -Cl                                                                  | NH <sub>3</sub> | 305 | 19 |  | NH <sub>3</sub>                               | 128 |
| 10 | R = <i>p</i> -Br                                                                  | NH <sub>3</sub> | 234 |    |                                                                                    |                                               |     |

Reaction conditions: Ketone, 0.05 mmol; 0.2mmol ammonia in water; Pd-NPs, 2.0mg; H<sub>2</sub>O, 10ml, H<sub>2</sub> filled in a balloon; reaction time, 3h; Temperature, rt; pH of the reaction medium was made at 2.0; Yields were determined by HPLC analysis equipped with a C18 reverse column. TOF was calculated by mmol of product formed per mmol of the available active sites of Pd (as determined by the chemisorption analysis) for the used catalyst. TON=TOF\*0.5h.

**Table S4.** Hydrogenation of imines

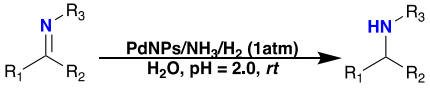

| Entry | Imine                                                                                                | TON  | Entry | Imine                                                                                 | TON  |
|-------|------------------------------------------------------------------------------------------------------|------|-------|---------------------------------------------------------------------------------------|------|
| 1     |                   | 1061 | 25    |  | 1053 |
| 2     |                   | 1053 | 26    |  | 1057 |
| 3     |                   | 1051 | 27    |  | 1054 |
| 4     |                   | 1052 | 28    |  | 1051 |
| 5     |                   | 1060 | 29    | PhCH=NPh                                                                              | 1051 |
| 6     |                   | 1056 | 30    |  | 1052 |
| 7     | R = <i>p</i> -Cl                                                                                     | 1051 | 31    |  | 1053 |
| 8     | R = <i>p</i> -Br                                                                                     | 1053 | 32    |  | 1054 |
| 9     | R = <i>m</i> -Cl                                                                                     | 1055 | 33    |  | 1053 |
| 10    | R = <i>m</i> -Br                                                                                     | 1062 | 34    |  | 1049 |
| 11    | R = <i>o</i> -Cl  | 1054 | 35    |  | 1051 |
| 12    | R = <i>o</i> -Br                                                                                     | 1050 | 36    |  | 1056 |
| 13    | R = <i>o</i> -I                                                                                      | 1049 | 37    | R = H                                                                                 | 1053 |
| 14    | R = <i>p</i> -I                                                                                      | 1055 | 38    | R = <i>p</i> -Cl                                                                      | 1052 |
| 15    |                   | 1057 | 39    | R = <i>p</i> -Br                                                                      | 1053 |
| 16    |                   | 1054 | 40    | R = <i>m</i> -Cl                                                                      | 1052 |

|    |                                                                                   |      |    |                                                                                     |      |
|----|-----------------------------------------------------------------------------------|------|----|-------------------------------------------------------------------------------------|------|
| 17 | 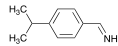 | 1049 | 41 | R = <i>m</i> -Br                                                                    | 1053 |
| 18 |  | 1050 | 42 | R = <i>o</i> -Cl                                                                    | 1056 |
| 19 |  | 1051 | 43 | R = <i>o</i> -Br                                                                    | 1052 |
| 20 |  | 1053 | 44 | R = <i>o</i> -I                                                                     | 1050 |
| 21 |  | 1053 | 45 | R = <i>p</i> -I                                                                     | 1053 |
| 22 |  | 1052 | 46 |  | 1062 |
| 23 | n-C <sub>3</sub> H <sub>7</sub> CH=NPh                                            | 1055 | 47 |  | 1052 |
| 24 | n-C <sub>3</sub> H <sub>7</sub> CH=NH                                             | 1049 | 48 |  | 1049 |

Reaction conditions: Imine, 0.05 mmol; Pd-NPs, 2.0 mg; H<sub>2</sub>O, 10ml; H<sub>2</sub> filled in a balloon; Reaction time, 1h; Temperature, rt; pH of the reaction medium was set at 2.0; Yields were determined by HPLC analysis equipped with a C18 reverse column. TOF was calculated by mmol of product formed per mmol of the available active sites of Pd (as determined by the chemisorption analysis) for the used catalyst. TON=TOF\*1h.

## 11. Quantum chemical calculations

Density functional theory (DFT) calculations were conducted at the B3LYP level theory (6-31++G\* basis sets for H, C, N, and O) using the conductor-like polarizable continuum model (CPCM) with parameters of the universal force field (UFF). The geometries of **1a**, **2a**, and all intermediates and byproducts were optimized, and the vibrational analysis was performed to confirm that they had no imaginary frequency. The Gibbs free energies in H<sub>2</sub>O (at 1 atm and 298.15 K) were calculated. All calculations were performed with the Gaussian16 program package.

**Table S5.** Cartesian coordinates (in Å) of the calculated structures.

### Benzaldehyde (1a)

| atom | x (Å)     | y (Å)     | z (Å)     |
|------|-----------|-----------|-----------|
| C    | -3.388070 | 0.112541  | -0.023724 |
| C    | -2.000882 | 0.082556  | 0.093863  |
| C    | -1.276512 | 1.287060  | 0.157718  |
| C    | -1.955761 | 2.515566  | 0.102582  |
| C    | -3.346671 | 2.543452  | -0.015325 |
| C    | -4.061091 | 1.342408  | -0.078330 |
| H    | -3.950217 | -0.815875 | -0.073266 |

|   |           |           |           |
|---|-----------|-----------|-----------|
| H | -1.466128 | -0.861639 | 0.137319  |
| H | -1.391863 | 3.444380  | 0.152275  |
| H | -3.871103 | 3.493807  | -0.057891 |
| H | -5.143796 | 1.361443  | -0.170116 |
| C | 0.192900  | 1.291028  | 0.282345  |
| H | 0.657258  | 2.295796  | 0.323754  |
| O | 0.898999  | 0.290763  | 0.340209  |

Charge = 0;  $E$  = -345.5171785 hartree

#### Benzimide (2a)

| atom | x (Å)     | y (Å)     | z (Å)     |
|------|-----------|-----------|-----------|
| C    | -1.340748 | -1.330616 | -0.000001 |
| C    | 0.036520  | -1.118677 | 0.000002  |
| C    | 0.553071  | 0.190207  | 0.000002  |
| C    | -0.337442 | 1.276654  | -0.000001 |
| C    | -1.718831 | 1.064189  | -0.000004 |
| C    | -2.222337 | -0.239871 | -0.000004 |
| H    | -1.732387 | -2.344496 | -0.000001 |
| H    | 0.724514  | -1.958408 | 0.000004  |
| H    | 0.055168  | 2.291154  | 0.000000  |
| H    | -2.397977 | 1.912456  | -0.000006 |
| H    | -3.295944 | -0.408998 | -0.000006 |
| C    | 2.004234  | 0.456186  | 0.000006  |
| H    | 2.277022  | 1.519799  | 0.000004  |
| N    | 2.889319  | -0.472212 | 0.000010  |
| H    | 3.828135  | -0.065820 | 0.000012  |

Charge = 0;  $E$  = -325.6246157 hartree

#### Benzylamine (3a)

| atom | x (Å)     | y (Å)     | z (Å)     |
|------|-----------|-----------|-----------|
| C    | -1.388510 | -1.314178 | 0.308133  |
| C    | -0.024413 | -1.100240 | 0.520785  |
| C    | 0.558376  | 0.149479  | 0.253719  |
| C    | -0.259220 | 1.179811  | -0.231260 |
| C    | -1.626765 | 0.970865  | -0.448059 |
| C    | -2.194886 | -0.277359 | -0.178494 |
| H    | -1.824351 | -2.286296 | 0.525667  |
| H    | 0.597127  | -1.908662 | 0.899757  |
| H    | 0.176179  | 2.155379  | -0.438706 |
| H    | -2.244953 | 1.782547  | -0.823741 |
| H    | -3.256906 | -0.442038 | -0.342056 |
| N    | 2.838039  | -0.289274 | -0.587335 |
| H    | 2.652546  | 0.159126  | -1.484919 |
| H    | 3.830597  | -0.144358 | -0.401420 |
| C    | 2.041459  | 0.373027  | 0.468534  |

|   |          |           |          |
|---|----------|-----------|----------|
| H | 2.347326 | -0.067331 | 1.424858 |
| H | 2.236336 | 1.454829  | 0.532733 |

Charge = 0;  $E$  = -326.8152174 hartree

**Cyclohexylmethylamine (4a)**

| atom | x (Å)     | y (Å)     | z (Å)     |
|------|-----------|-----------|-----------|
| C    | 1.458373  | -1.453198 | -0.125611 |
| C    | 0.038797  | -1.004363 | -0.550038 |
| C    | -0.463243 | 0.161767  | 0.316421  |
| C    | 0.433482  | 1.408462  | 0.094190  |
| C    | 1.898518  | 1.046008  | -0.251451 |
| C    | 2.313394  | -0.276801 | 0.408176  |
| H    | 1.385975  | -2.230280 | 0.647207  |
| H    | 0.048161  | -0.675498 | -1.600332 |
| H    | 0.011171  | 2.019790  | -0.716765 |
| H    | 2.012170  | 0.949523  | -1.340492 |
| H    | 2.186584  | -0.185310 | 1.496348  |
| C    | -1.937364 | 0.514271  | 0.075050  |
| H    | -2.101100 | 0.661764  | -1.001110 |
| N    | -2.848244 | -0.556142 | 0.523655  |
| H    | -2.806350 | -0.633832 | 1.540361  |
| H    | -3.810906 | -0.300482 | 0.306320  |
| H    | 0.405193  | 2.033672  | 0.996944  |
| H    | 2.568307  | 1.859440  | 0.055390  |
| H    | 3.379433  | -0.475732 | 0.239314  |
| H    | 1.960712  | -1.918167 | -0.984479 |
| H    | -0.657459 | -1.848325 | -0.495828 |
| H    | -0.371980 | -0.142923 | 1.372105  |
| H    | -2.153484 | 1.479768  | 0.564726  |

Charge = 0;  $E$  = -330.3594992 hartree

**4,5-dihydro-2,4,5-triphenyl-1H-imidazole (5a)**

| atom | x (Å)     | y (Å)     | z (Å)     |
|------|-----------|-----------|-----------|
| C    | 0.506908  | 0.746406  | -1.071446 |
| C    | 1.579255  | 0.914597  | -0.190337 |
| C    | 1.665151  | 2.052736  | 0.626382  |
| C    | 0.646661  | 3.014239  | 0.543583  |
| C    | -0.425131 | 2.852371  | -0.339269 |
| C    | -0.498254 | 1.715954  | -1.151268 |
| H    | 0.457583  | -0.142817 | -1.694999 |
| H    | 2.350055  | 0.149919  | -0.141891 |
| H    | 0.690922  | 3.896546  | 1.178700  |
| H    | -1.205259 | 3.608089  | -0.385442 |
| H    | -1.333242 | 1.583680  | -1.834437 |
| N    | 3.315069  | 1.039154  | 2.213945  |

|   |          |           |           |
|---|----------|-----------|-----------|
| H | 2.633496 | 0.309950  | 2.397664  |
| C | 4.090148 | 3.617822  | -0.306109 |
| C | 4.156292 | 3.021357  | -1.573242 |
| C | 4.046808 | 3.795063  | -2.732904 |
| C | 3.865024 | 5.179410  | -2.642162 |
| C | 3.801368 | 5.784888  | -1.382738 |
| C | 3.918653 | 5.007945  | -0.226025 |
| H | 4.303900 | 1.948021  | -1.648434 |
| H | 4.104708 | 3.316349  | -3.707537 |
| H | 3.780823 | 5.781002  | -3.543680 |
| H | 3.669225 | 6.860864  | -1.299769 |
| H | 3.880144 | 5.488384  | 0.749928  |
| C | 4.190573 | 2.799785  | 0.964686  |
| H | 4.642903 | 3.441756  | 1.735107  |
| N | 5.040123 | 1.602898  | 0.846528  |
| C | 4.500028 | 0.683275  | 1.577988  |
| C | 5.093812 | -0.655841 | 1.790380  |
| C | 6.045025 | -1.148016 | 0.879913  |
| C | 4.728174 | -1.447730 | 2.891665  |
| C | 6.613445 | -2.407994 | 1.065169  |
| H | 6.325956 | -0.536587 | 0.028334  |
| C | 5.301083 | -2.709100 | 3.076431  |
| H | 4.014335 | -1.075333 | 3.620686  |
| C | 6.242912 | -3.193204 | 2.164071  |
| H | 7.343673 | -2.779851 | 0.351317  |
| H | 5.013875 | -3.309158 | 3.935632  |
| H | 6.686541 | -4.174900 | 2.307325  |
| C | 2.822688 | 2.278104  | 1.586209  |
| H | 2.496087 | 2.984371  | 2.354052  |

Charge = 0;  $E$  = -920.3352138 hartree

**N-(phenylmethylene)-benzenemethanamine (6a)**

| atom | x (Å)    | y (Å)    | z (Å)     |
|------|----------|----------|-----------|
| C    | 3.569159 | 3.018509 | 0.024834  |
| C    | 4.635889 | 3.936233 | 0.049989  |
| C    | 4.511622 | 5.176581 | -0.573321 |
| C    | 3.321894 | 5.520770 | -1.231029 |
| C    | 2.256702 | 4.616039 | -1.261582 |
| C    | 2.380963 | 3.372134 | -0.636631 |
| H    | 5.555011 | 3.665084 | 0.560309  |
| H    | 5.340704 | 5.879058 | -0.548776 |
| H    | 3.228763 | 6.489038 | -1.715847 |
| H    | 1.332239 | 4.876816 | -1.769821 |
| H    | 1.551866 | 2.668232 | -0.660606 |
| C    | 3.655199 | 1.695304 | 0.670667  |

|   |          |           |           |
|---|----------|-----------|-----------|
| H | 2.753968 | 1.068945  | 0.577945  |
| N | 4.686186 | 1.279235  | 1.300713  |
| C | 5.744723 | -0.940502 | 1.367197  |
| C | 5.578518 | -1.660131 | 0.174466  |
| C | 6.967681 | -1.034692 | 2.046371  |
| C | 6.611606 | -2.455644 | -0.330340 |
| H | 4.633330 | -1.600004 | -0.361346 |
| C | 8.004923 | -1.828213 | 1.544824  |
| H | 7.108696 | -0.486201 | 2.975410  |
| C | 7.829313 | -2.540840 | 0.354056  |
| H | 6.465013 | -3.010472 | -1.253735 |
| H | 8.946064 | -1.892642 | 2.085268  |
| H | 8.632724 | -3.160768 | -0.035560 |
| C | 4.625474 | -0.058892 | 1.893684  |
| H | 3.650345 | -0.537864 | 1.709615  |
| H | 4.740830 | 0.058609  | 2.978420  |

---

Charge = 0;  $E = -595.8995057$  hartree

**N-(phenylmethyl)-benzenemethanamine (7a)**

| atom | x (Å)    | y (Å)     | z (Å)     |
|------|----------|-----------|-----------|
| C    | 3.186299 | 2.920446  | -0.163554 |
| C    | 3.528684 | 3.331259  | -1.461997 |
| C    | 3.601494 | 4.688139  | -1.787313 |
| C    | 3.332784 | 5.658909  | -0.814376 |
| C    | 2.989745 | 5.262304  | 0.481457  |
| C    | 2.916865 | 3.901370  | 0.801441  |
| H    | 3.736234 | 2.580796  | -2.221750 |
| H    | 3.863423 | 4.988813  | -2.798815 |
| H    | 3.386854 | 6.714862  | -1.066824 |
| H    | 2.776029 | 6.008840  | 1.242392  |
| H    | 2.644538 | 3.598635  | 1.810648  |
| C    | 5.840428 | -1.072724 | 0.995429  |
| C    | 6.670695 | -1.396064 | -0.089954 |
| C    | 6.337542 | -1.244926 | 2.295139  |
| C    | 7.965597 | -1.877811 | 0.118382  |
| H    | 6.296401 | -1.271256 | -1.103771 |
| C    | 7.634658 | -1.725840 | 2.509744  |
| H    | 5.704038 | -1.004167 | 3.146617  |
| C    | 8.452163 | -2.043206 | 1.421112  |
| H    | 8.593507 | -2.127862 | -0.733293 |
| H    | 8.002637 | -1.854352 | 3.524676  |
| H    | 9.458610 | -2.420096 | 1.584540  |
| C    | 4.445975 | -0.530143 | 0.765905  |
| H    | 3.953419 | -1.088666 | -0.040448 |
| H    | 3.838722 | -0.679025 | 1.676438  |

|   |          |          |           |
|---|----------|----------|-----------|
| C | 3.129916 | 1.449894 | 0.191231  |
| H | 2.514366 | 1.313517 | 1.098145  |
| H | 2.639872 | 0.887567 | -0.614009 |
| N | 4.481179 | 0.885473 | 0.357389  |
| H | 4.971400 | 1.419896 | 1.076086  |

Charge = 0;  $E = -597.0859442$  hartree

## 12. Characterization data for all products

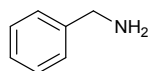

**phenylmethanamine:**  $^1\text{H}$  NMR (400 MHz,  $\text{CDCl}_3$ ):  $\delta = 7.31\text{--}7.18$  (m, 5H), 3.79 (s, 2H), 1.43 (brs, 2H).  $^{13}\text{C}$  NMR (100 MHz,  $\text{CDCl}_3$ ):  $\delta = 143.42, 128.53, 127.09, 126.76, 46.51$ .

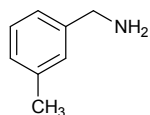

**(3-methylphenyl)methanamine:**  $^1\text{H}$  NMR (400 MHz,  $\text{CDCl}_3$ ):  $\delta = 7.24\text{--}7.20$  (m, 1H), 7.12-7.04 (m, 3H), 3.81 (s, 2H), 2.34 (s, 3H), 1.51 (brs, 2H).  $^{13}\text{C}$  NMR (100 MHz,  $\text{CDCl}_3$ ):  $\delta = 143.34, 138.18, 128.48, 127.89, 127.53, 124.11, 46.51, 21.42$ .

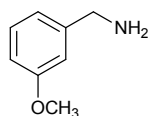

**(3-methoxyphenyl)methanamine:**  $^1\text{H}$  NMR (400 MHz,  $\text{CDCl}_3$ ):  $\delta = 7.24$  (t,  $J = 16.0$  Hz, 1H), 6.89-6.76 (m, 3H), 3.82 (s, 2H), 3.79 (s, 3H), 1.50 (brs, 2H).  $^{13}\text{C}$  NMR (100 MHz,  $\text{CDCl}_3$ ):  $\delta = 159.85, 145.08, 129.55, 119.32, 112.59, 112.21, 55.18, 46.50$ .

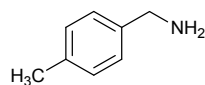

**(4-methylphenyl)methanamine:**  $^1\text{H}$  NMR (400 MHz,  $\text{DMSO-d}_6$ ):  $\delta = 7.21$  (d,  $J = 8.0$  Hz, 2H), 7.10 (d,  $J = 8.0$  Hz, 2H), 3.68 (s, 2H), 2.27 (s, 3H), 1.72 (brs, 2H).  $^{13}\text{C}$  NMR (100 MHz,  $\text{DMSO-d}_6$ ):  $\delta = 141.76, 135.46, 129.08, 127.39, 45.93, 21.12$ .

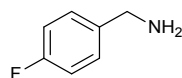

**(4-fluorophenyl)methanamine:**  $^1\text{H}$  NMR (400 MHz,  $\text{CDCl}_3$ ):  $\delta = 7.25\text{--}7.22$  (q,  $J = 4.0$  Hz, 2H), 6.97 (t,  $J = 20.0$  Hz, 2H), 3.78 (s, 2H), 1.55 (brs, 2H).  $^{13}\text{C}$  NMR (100 MHz,  $\text{CDCl}_3$ ):  $\delta = 161.68$  (d,  $J = 242.0$  Hz), 138.97 (d,  $J = 3.0$  Hz), 128.57 (d,  $J = 8.0$  Hz), 115.10 (d,  $J = 21.0$  Hz), 45.61.

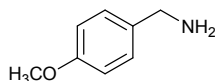

**(4-methoxyphenyl)methanamine:**  $^1\text{H}$  NMR (400 MHz, DMSO- $d_6$ ):  $\delta$  = 7.24 (d,  $J$  = 8.0 Hz, 2H), 6.86 (d,  $J$  = 8.0 Hz, 2H), 3.72 (s, 3H), 3.65 (s, 2H), 1.68 (brs, 2H).  $^{13}\text{C}$  NMR (100 MHz, DMSO- $d_6$ ):  $\delta$  = 158.25, 136.82, 128.56, 113.91, 55.41, 45.60.

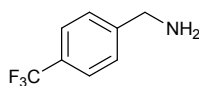

**(4-(trifluoromethyl)phenyl)methanamine:**  $^1\text{H}$  NMR (400 MHz,  $\text{CDCl}_3$ ):  $\delta$  = 7.58 (d,  $J$  = 8.0 Hz, 2H), 7.43 (d,  $J$  = 8.0 Hz, 2H), 3.93 (s, 2H), 1.64 (brs, 2H).  $^{13}\text{C}$  NMR (100 MHz,  $\text{CDCl}_3$ ):  $\delta$  = 147.07, 128.66 (q,  $J$  = 40.0 Hz), 127.30, 125.41 (q,  $J$  = 4.0 Hz), 122.91, 45.93.

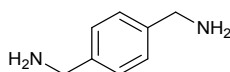

**1,4-phenylenedimethanamine:**  $^1\text{H}$  NMR (400 MHz, DMSO- $d_6$ ):  $\delta$  = 7.25 (s, 4H), 3.68 (s, 4H), 2.21 (brs, 4H).  $^{13}\text{C}$  NMR (100 MHz, DMSO- $d_6$ ):  $\delta$  = 142.59, 127.24, 45.95.

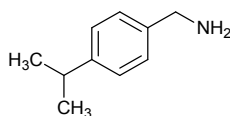

**(4-isopropylphenyl)methanamine:**  $^1\text{H}$  NMR (400 MHz,  $\text{CDCl}_3$ ):  $\delta$  = 7.23-7.18 (m, 4H), 3.81 (s, 2H), 2.92-2.85 (m, 1H), 1.51 (s, 2H), 1.24 (d,  $J$  = 8.0 Hz, 6H).  $^{13}\text{C}$  NMR (100 MHz,  $\text{CDCl}_3$ ):  $\delta$  = 147.45, 140.85, 127.11, 126.60, 46.29, 33.82, 24.10.

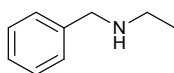

**N-ethylbenzylamine:**  $^1\text{H}$  NMR (400 MHz,  $\text{CDCl}_3$ ):  $\delta$  = 7.32-7.23 (m, 5H), 3.79 (s, 2H), 2.71-2.65 (m, 2H), 1.62 (s, 1H), 1.13 (t,  $J$  = 16.0 Hz, 3H).  $^{13}\text{C}$  NMR (100 MHz,  $\text{CDCl}_3$ ):  $\delta$  = 140.40, 128.39, 128.15, 126.89, 53.93, 43.62, 15.25.

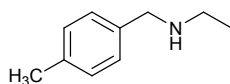

**N-ethyl-4-methylbenzylamine:**  $^1\text{H}$  NMR (400 MHz,  $\text{CDCl}_3$ ):  $\delta$  = 7.21-7.12 (m, 4H), 3.75 (s, 2H), 2.68-2.64 (m, 2H), 2.33 (s, 3H), 1.75 (s, 1H), 1.12 (t,  $J$  = 16.0 Hz, 3H).  $^{13}\text{C}$  NMR (100 MHz,  $\text{CDCl}_3$ ):  $\delta$  = 137.32, 136.45, 129.06, 128.11, 53.61, 43.53, 21.07, 15.20.

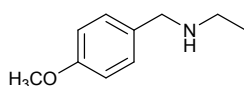



**N-ethyl-4-methoxybenzylamine:**  $^1\text{H}$  NMR (400 MHz,  $\text{CDCl}_3$ ):  $\delta$  = 7.24 (d,  $J$  = 8.0 Hz, 2H), 6.87 (d,  $J$  = 8.0 Hz, 2H), 3.79 (s, 3H), 3.72 (s, 2H), 2.69-2.64 (m, 2H), 1.48 (s, 1H), 1.12 (t,  $J$  = 16.0 Hz, 3H).  $^{13}\text{C}$  NMR (100 MHz,  $\text{CDCl}_3$ ):  $\delta$  = 158.56, 132.64, 129.30, 113.74, 55.24, 53.35, 43.54, 15.25.

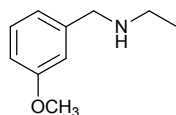

**N-ethyl-3-methoxybenzylamine:**  $^1\text{H}$  NMR (400 MHz,  $\text{CDCl}_3$ ):  $\delta$  = 7.26-7.22 (m, 1H), 6.91-6.78 (m, 3H), 3.81 (s, 3H), 3.77 (s, 2H), 2.71-2.66 (m, 2H), 2.18 (s, H), 1.14 (t,  $J$  = 12.0 Hz, 3H).  $^{13}\text{C}$  NMR (100 MHz,  $\text{CDCl}_3$ ):  $\delta$  = 159.72, 141.67, 129.39, 120.50, 113.65, 112.51, 55.19, 53.69, 43.46, 15.05.

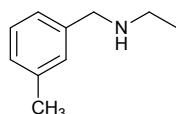

**N-ethyl-3-methylbenzylamine:**  $^1\text{H}$  NMR (400 MHz,  $\text{CDCl}_3$ ):  $\delta$  = 7.25-7.05 (m, 4H), 3.75 (s, 2H), 2.71-2.66 (m, 2H), 2.34 (s, 3H), 2.28 (s, 1H), 1.14 (t,  $J$  = 12.0 Hz, 3H).  $^{13}\text{C}$  NMR (100 MHz,  $\text{CDCl}_3$ ):  $\delta$  = 139.95, 138.04, 129.01, 128.30, 127.73, 125.27, 53.76, 43.54, 21.38, 15.06.

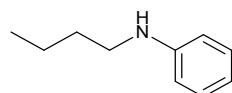

**N-butylaniline:**  $^1\text{H}$  NMR (400 MHz,  $\text{CDCl}_3$ ):  $\delta$  = 7.27-7.19 (m, 2H), 6.75-6.63 (m, 3H), 3.57 (brs, H), 3.15 (t,  $J$  = 12.0 Hz, 2H), 1.68-1.61 (m, 2H), 1.52-1.42 (m, 2H), 1.00 (t,  $J$  = 16.0 Hz, 3H).  $^{13}\text{C}$  NMR (100 MHz,  $\text{CDCl}_3$ ):  $\delta$  = 148.49, 129.21, 117.08, 112.69, 43.68, 31.65, 20.30, 13.92.

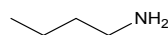

**Butan-1-amine:**  $^1\text{H}$  NMR (400 MHz,  $\text{CDCl}_3$ ):  $\delta$  = 2.69 (t,  $J$  = 12.0 Hz, 2H), 1.44-1.32 (m, 4H), 1.15 (brs, 2H), 0.92 (t,  $J$  = 16.0 Hz, 3H).  $^{13}\text{C}$  NMR (100MHz,  $\text{CDCl}_3$ ):  $\delta$  = 41.82, 35.93, 19.85, 13.77.

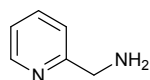

**2-(aminomethyl)pyridine:**  $^1\text{H}$  NMR (400 MHz,  $\text{CDCl}_3$ ):  $\delta$  = 8.53 (d,  $J$  = 4.0 Hz, 1H), 7.63-7.59 (m, 1H), 7.25 (d,  $J$  = 8.0 Hz, 1H), 7.13-7.10 (m, 1H), 3.94 (s, 2H), 1.78 (s, 2H);  $^{13}\text{C}$  NMR (100 MHz,  $\text{CDCl}_3$ ):  $\delta$  = 161.91, 149.22, 136.49, 121.73, 121.14, 47.78.

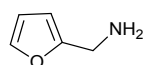

**2-furfurylamine:**  $^1\text{H}$  NMR (400 MHz,  $\text{CDCl}_3$ ):  $\delta$  = 7.36-7.35 (m, 1H), 6.33-6.32 (m, 1H), 6.15-6.14 (m, 1H), 3.83 (s, 2H), 1.54 (s, 2H);  $^{13}\text{C}$  NMR (100 MHz,  $\text{CDCl}_3$ ):  $\delta$  = 156.66, 141.53, 110.14, 104.98, 39.31.

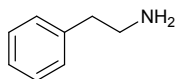

**2-phenylethylamine:**  $^1\text{H}$  NMR (400 MHz,  $\text{CDCl}_3$ ):  $\delta$  = 7.36-7.30 (m, 2H), 7.27-7.23 (m, 3H), 3.02 (t,  $J$  = 12.0 Hz, 2H), 2.80 (t,  $J$  = 12.0 Hz, 2H);  $^{13}\text{C}$  NMR (100 MHz,  $\text{CDCl}_3$ ):  $\delta$  = 139.86, 128.84, 128.45, 126.15, 43.60, 40.16.

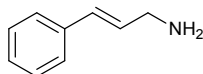

**3-phenyl-2-propen-1-amine:**  $^1\text{H}$  NMR (400 MHz,  $\text{CDCl}_3$ ):  $\delta$  = 7.37-7.23 (m, 5H), 2.73-2.67 (m, 4H), 1.91-1.83 (m, 2H);  $^{13}\text{C}$  NMR (100 MHz,  $\text{CDCl}_3$ ):  $\delta$  = 142.17, 128.38, 128.34, 125.78, 49.51, 33.72, 31.75.

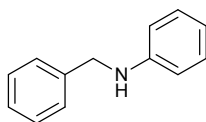

**N-benzylaniline:**  $^1\text{H}$  NMR (400 MHz,  $\text{CDCl}_3$ ):  $\delta$  = 7.38-7.15 (m, 7H), 6.73-6.62 (m, 3H), 4.32 (s, 2H), 4.01 (s, 1H).  $^{13}\text{C}$  NMR (100 MHz,  $\text{CDCl}_3$ ):  $\delta$  = 148.17, 139.45, 129.29, 128.66, 127.53, 127.25, 117.58, 112.86, 48.33.

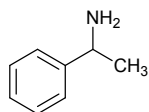

**1-phenylethylamine:**  $^1\text{H}$  NMR (400 MHz,  $\text{CDCl}_3$ ):  $\delta$  = 7.29-7.17 (m, 5H), 4.06-4.01 (m, 1H), 1.66 (s, 2H), 1.34 (d,  $J$  = 4.0 Hz, 3H).  $^{13}\text{C}$  NMR (100 MHz,  $\text{CDCl}_3$ ):  $\delta$  = 147.79, 128.49, 126.81, 125.71, 51.31, 25.70.

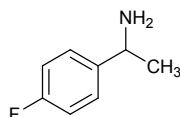

**1-(4-fluorophenyl)ethanamine:**  $^1\text{H}$  NMR (400 MHz,  $\text{CDCl}_3$ ):  $\delta$  = 7.32-7.28 (m, 2H), 7.02-6.97 (m, 2H), 4.13-4.08 (m, 1H), 1.63 (s, 2H), 1.36 (d,  $J$  = 4.0 Hz, 3H).  $^{13}\text{C}$  NMR (100 MHz,  $\text{CDCl}_3$ ):  $\delta$  = 162.91 (d,  $J$  = 243.0 Hz), 143.38 (d,  $J$  = 3.0 Hz), 127.25 (d,  $J$  = 7.0 Hz), 115.23 (d,  $J$  = 21.0 Hz), 50.65, 25.81.

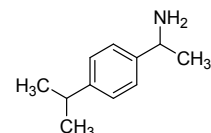

**1-(4-isopropylphenyl)ethanamine:**  $^1\text{H}$  NMR (400 MHz,  $\text{CDCl}_3$ ):  $\delta$  = 7.26-7.17 (m, 4H), 4.09-4.04 (m, 1H), 2.92-2.85 (m, H), 1.93 (s, 2H), 1.38 (d,  $J$  = 8.0 Hz, 3H), 1.25 (d,  $J$  = 8.0 Hz, 6H).  $^{13}\text{C}$  NMR (100 MHz,  $\text{CDCl}_3$ ):  $\delta$  = 147.44, 145.03, 126.53, 125.65, 51.03, 33.76, 25.50, 24.06.

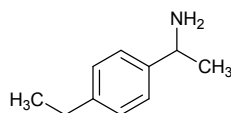

**1-(4-ethylphenyl)ethylamine:**  $^1\text{H}$  NMR (400 MHz,  $\text{CDCl}_3$ ):  $\delta$  = 7.25 (d,  $J$  = 8.0 Hz, 2H), 7.16 (d,  $J$  = 8.0 Hz, 2H), 4.08 (q,  $J$  = 20.0 Hz, 1H), 2.63 (q,  $J$  = 20.0 Hz, 2H), 1.72 (brs, 2H), 1.38 (d,  $J$  = 4.0 Hz, 3H), 1.23 (t,  $J$  = 8.0 Hz, 3H).  $^{13}\text{C}$  NMR (100 MHz,  $\text{CDCl}_3$ ):  $\delta$  = 145.04, 142.80, 127.98, 125.67, 51.07, 28.49, 25.63, 15.66.

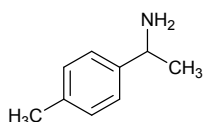

**1-(4-methylphenyl)ethylamine:**  $^1\text{H}$  NMR (400 MHz,  $\text{CDCl}_3$ ):  $\delta$  = 7.23 (d,  $J$  = 8.0 Hz, 2H), 7.14 (d,  $J$  = 8.0 Hz, 2H), 4.09 (q,  $J$  = 20.0 Hz, 1H), 2.32 (s, 3H), 1.77 (s, 2H), 1.37 (d,  $J$  = 8.0 Hz, 3H).  $^{13}\text{C}$  NMR (100 MHz,  $\text{CDCl}_3$ ):  $\delta$  = 144.76, 136.37, 129.17, 125.61, 51.04, 25.63, 21.03.

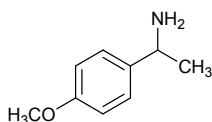

**1-(4-methoxyphenyl)ethylamine:**  $^1\text{H}$  NMR (400 MHz,  $\text{CDCl}_3$ ):  $\delta$  = 7.20 (d,  $J$  = 8.0 Hz, 2H), 6.81 (d,  $J$  = 12.0 Hz, 2H), 4.03-3.98 (m, 1H), 3.72 (s, 3H), 1.93 (s, 2H), 1.31 (d,  $J$  = 8.0 Hz, 3H).  $^{13}\text{C}$  NMR (100 MHz,  $\text{CDCl}_3$ ):  $\delta$  = 158.49, 139.63, 126.78, 113.84, 55.29, 50.67, 25.55.

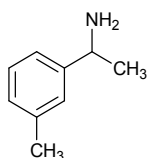

**1-(3-methylphenyl)ethylamine:**  $^1\text{H}$  NMR (400 MHz,  $\text{CDCl}_3$ ):  $\delta$  = 7.26-7.20 (m, 1H), 7.16-7.12 (t,  $J$  = 16.0 Hz, 2H), 7.06 (d,  $J$  = 8.0 Hz, 1H), 4.10 (q,  $J$  = 20.0 Hz, 1H), 2.35 (s, 3H), 1.82 (s, 2H), 1.39 (d,  $J$  = 8.0 Hz, 3H).  $^{13}\text{C}$  NMR (100 MHz,  $\text{CDCl}_3$ ):  $\delta$  = 147.61, 138.11, 128.42, 127.59, 126.44, 122.73, 51.30, 25.55, 21.47.

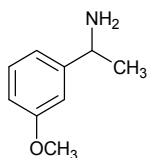

**1-(3-methoxyphenyl)ethylamine:**  $^1\text{H}$  NMR (400 MHz,  $\text{CDCl}_3$ ):  $\delta$  = 7.18 (t,  $J$  = 16.0 Hz, 1H), 6.82 (t,  $J$  = 8.0 Hz, 2H), 6.70-6.67 (m, 1H), 4.02-3.97 (m, 1H), 3.72 (d,  $J$  = 8.0 Hz, 3H), 1.93 (s, 2H), 1.30 (d,  $J$  = 8.0 Hz, 3H).  $^{13}\text{C}$  NMR (100 MHz,  $\text{CDCl}_3$ ):  $\delta$  = 159.78, 149.33, 129.52, 118.06, 112.11, 111.42, 55.19, 51.31, 25.47.

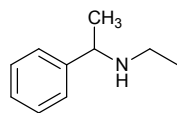

**N-ethyl-1-phenethylamine:**  $^1\text{H}$  NMR (400 MHz,  $\text{CDCl}_3$ ):  $\delta$  = 7.34-7.21 (m, 5H), 3.79-3.74 (m, 1H), 2.56-2.44 (m, 2H), 1.50 (brs, 1H), 1.36 (d,  $J$  = 4.0 Hz, 3H), 1.09 (t,  $J$  = 16.0 Hz, 3H).  $^{13}\text{C}$  NMR (100 MHz,  $\text{CDCl}_3$ ):  $\delta$  = 145.80, 128.40, 126.83, 126.53, 58.30, 42.01, 24.26, 15.41.

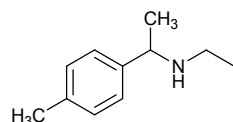

**N-ethyl-1-(4-methylphenyl)ethylamine:**  $^1\text{H}$  NMR (400 MHz,  $\text{CDCl}_3$ ):  $\delta$  = 7.25-7.12 (m, 4H), 3.76-3.71 (m, 1H), 2.55-2.44 (m, 2H), 2.33 (s, 3H), 1.57 (s, 1H), 1.35 (d,  $J$  = 8.0 Hz, 3H), 1.09 (t,  $J$  = 16.0 Hz, 3H).  $^{13}\text{C}$  NMR (100 MHz,  $\text{CDCl}_3$ ):  $\delta$  = 142.73, 136.37, 129.08, 126.43, 57.95, 41.97, 24.25, 21.05, 15.38.

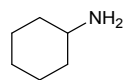

**Cyclohexylamine:**  $^1\text{H}$  NMR (400 MHz,  $\text{CDCl}_3$ ):  $\delta$  = 2.65-2.58 (m, 1H), 1.83-1.56 (m, 5H), 1.32-0.99 (m, 7H).  $^{13}\text{C}$  NMR (100 MHz,  $\text{CDCl}_3$ ):  $\delta$  = 50.36, 36.81, 25.59, 25.05.

### 13. The control reactions and MS spectra

The results from the control experiments showed us that in the presence of  $\text{H}_2$  plus Pd-NPs, the formation of benzaldimine was not observed, only the final product benzylamine was generated (**eq 1**). By removing Pd-NPs, neither the formation of benzaldimine nor the generation of benzylamine was detected (**eq 2**), and if we solely use unincubated Pd-NPs in absence of  $\text{H}_2$ , the proposed benzaldimine was not observed, nor with the product benzylamine (**eq 3**), indicating that in the presence of  $\text{H}_2$ , the imidization of benzaldehyde into benzaldimine cannot occur without Pd-NPs, or under the condition that in the presence of Pd-NPs without  $\text{H}_2$  (**eq 3**). However, the imidization reaction could take place with incubated Pd-NPs even without  $\text{H}_2$  (**Scheme S1**). Besides, in order to check the possible H/D exchange, reaction was performed using  $\text{D}_2\text{O}$  and  $\text{H}_2$  (**eq 4**), results indicated that the element D of  $\text{D}_2\text{O}$  didn't participate the reductive amination process.

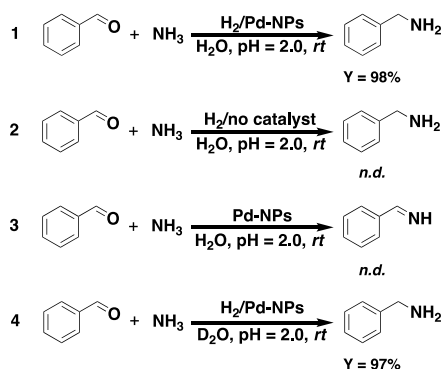

**Scheme S1.** Control reactions

Input: 2834 Spectra library: NIST17-1. lib Molecular formula: C<sub>7</sub>H<sub>9</sub>N Molar mass: 107

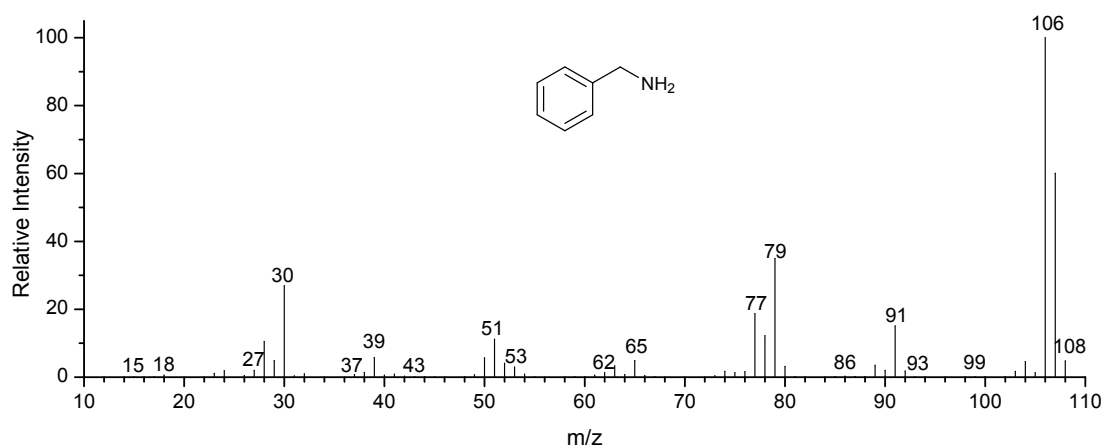

**Figure S5.** MS spectra of phenylmethanamine

The reductive amination of benzaldehyde proceed in D<sub>2</sub>O using H<sub>2</sub> of 1 atm. MS (EI): m/z calculated for product: 106. Obtaining the structure of phenylmethanamine from a library, and fragment peak information also matches the compound, the result shows H/D exchange didn't carried out.

#### 14. <sup>1</sup>H NMR and <sup>13</sup>C NMR spectra of products

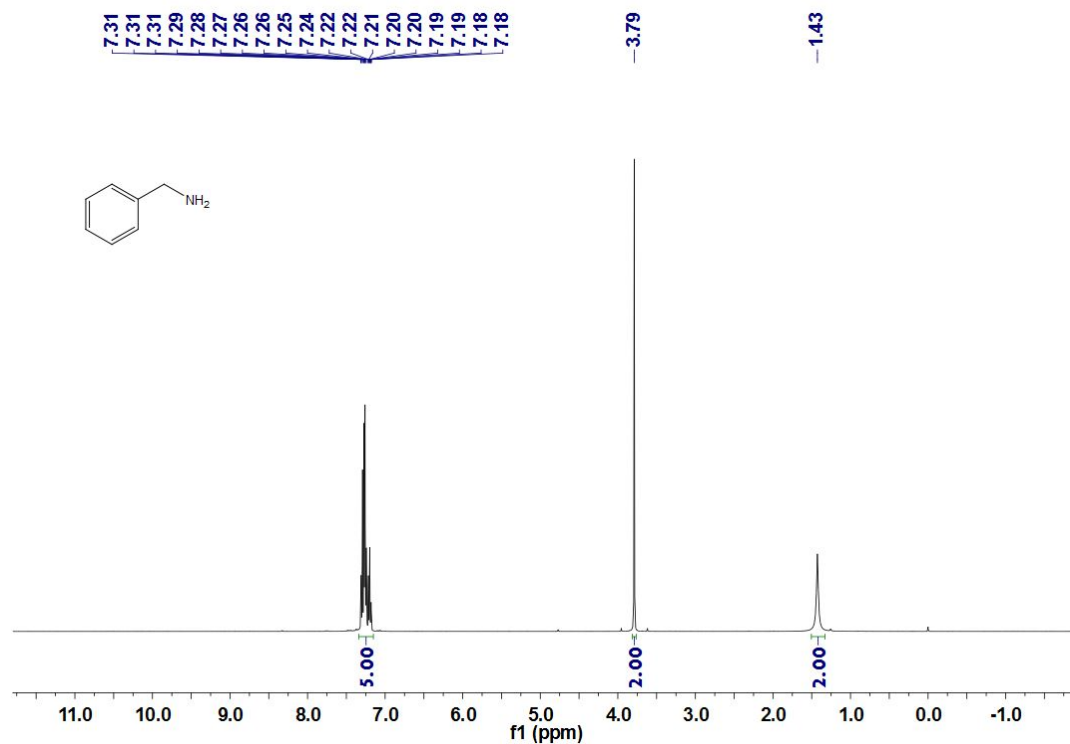

<sup>1</sup>H NMR of phenylmethanamine

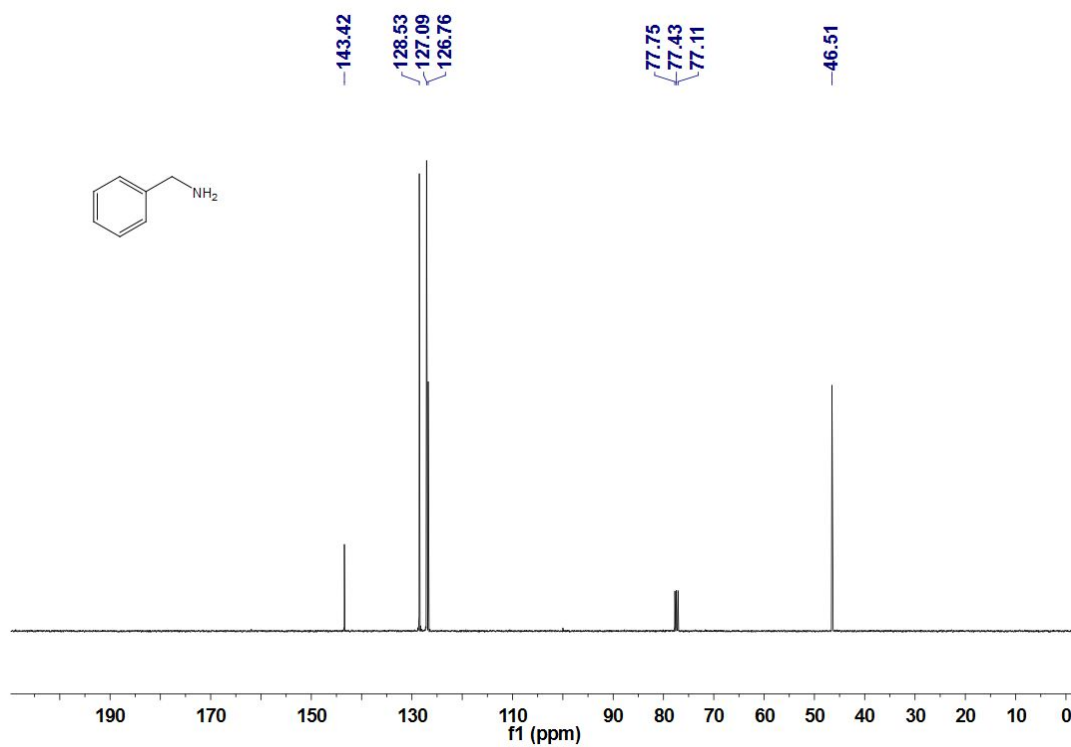

$^{13}\text{C}$  NMR of phenylmethanamine

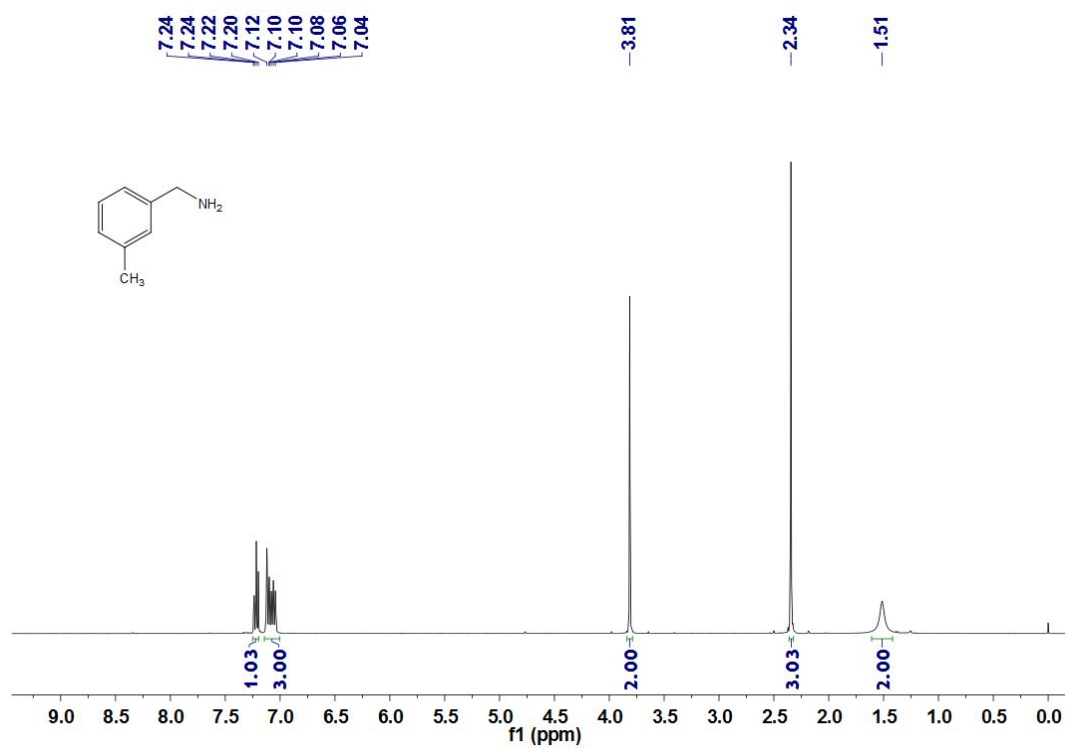

$^1\text{H}$  NMR of (3-methylphenyl)methanamine

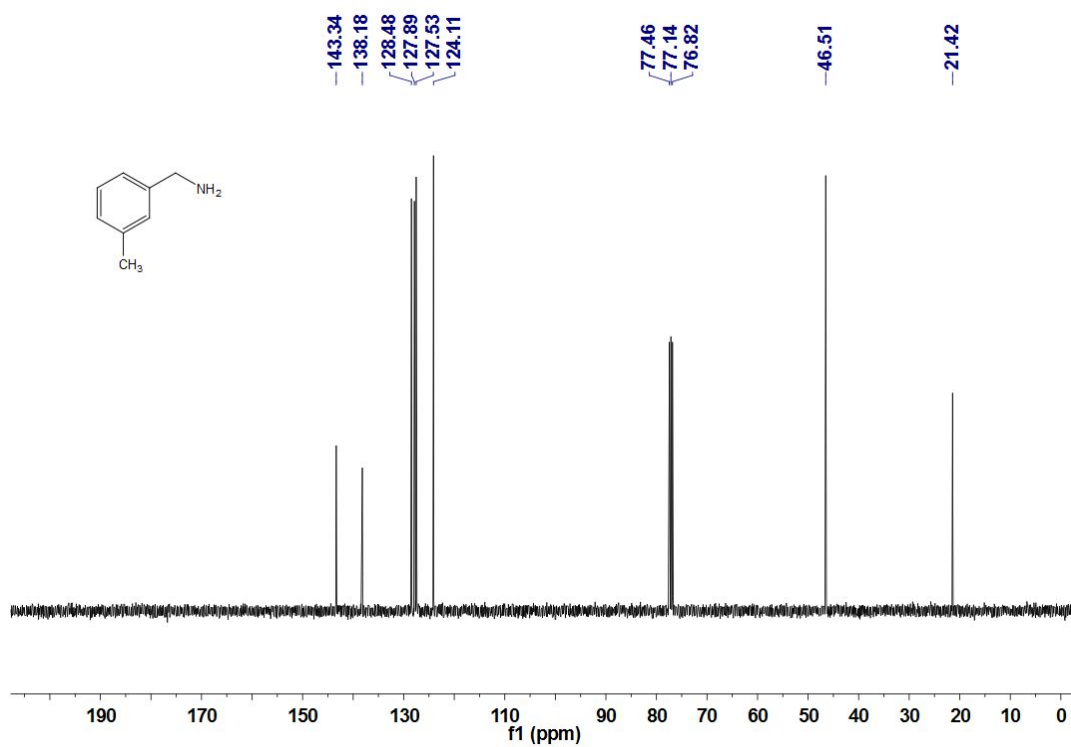

<sup>13</sup>C NMR of (3-methylphenyl)methanamine

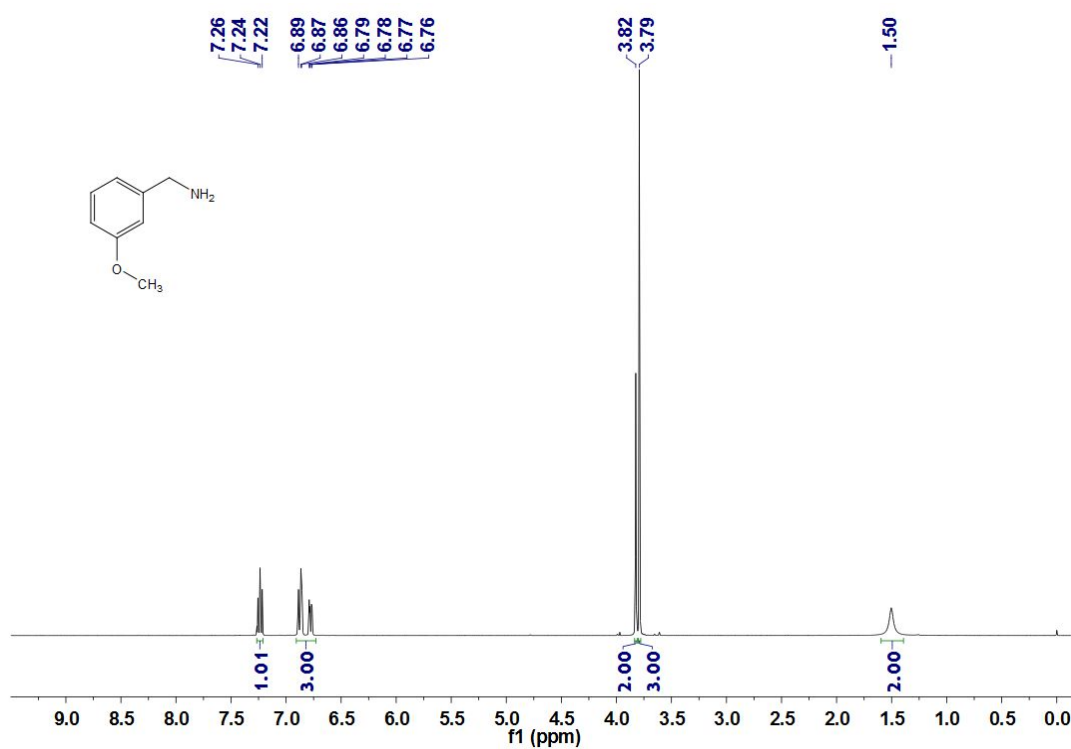

<sup>1</sup>H NMR of (3-methoxyphenyl)methanamine

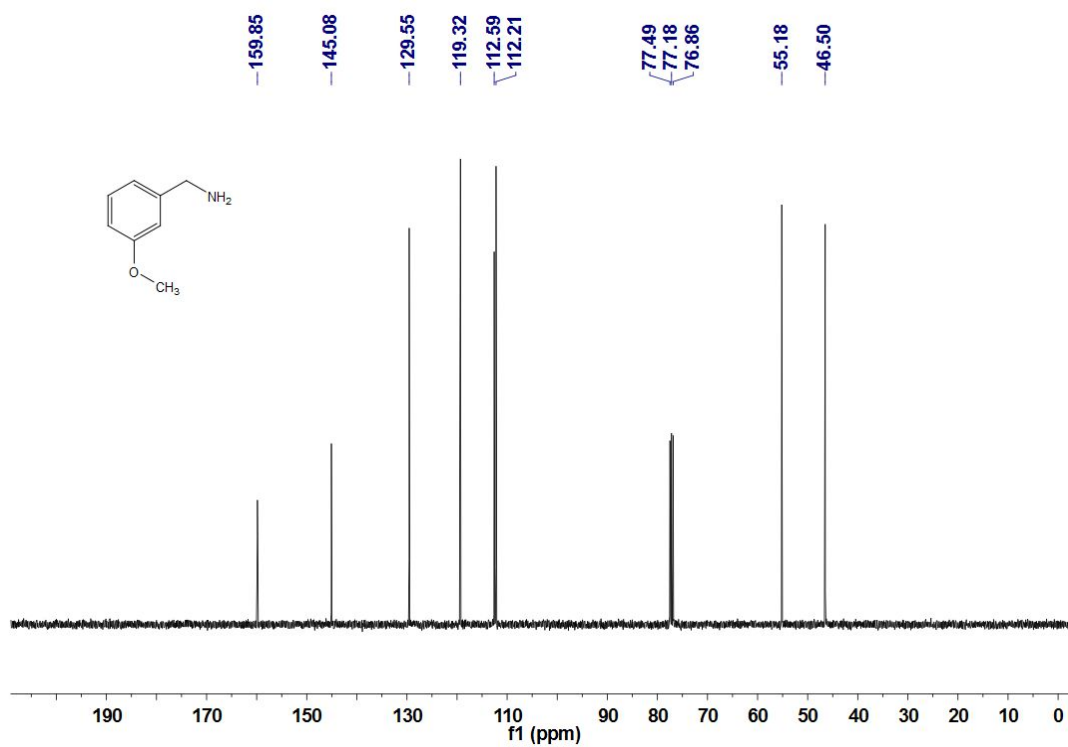

<sup>13</sup>C NMR of (3-methoxyphenyl)methanamin

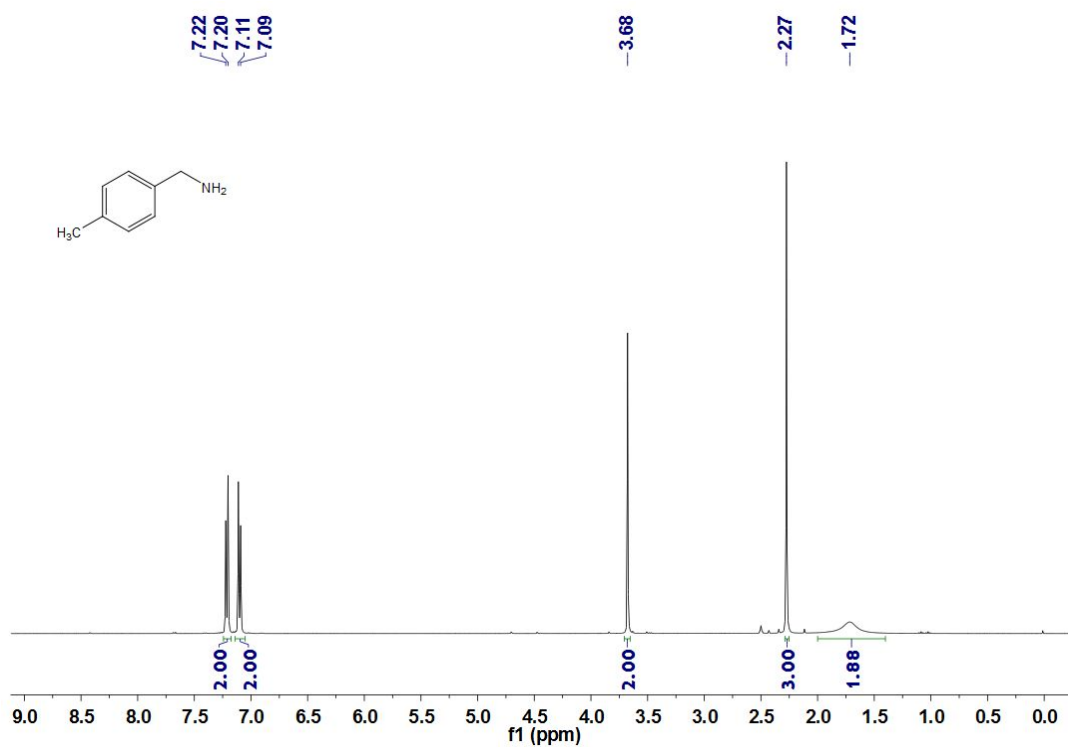

<sup>1</sup>H NMR of (4-methylphenyl)methanamine



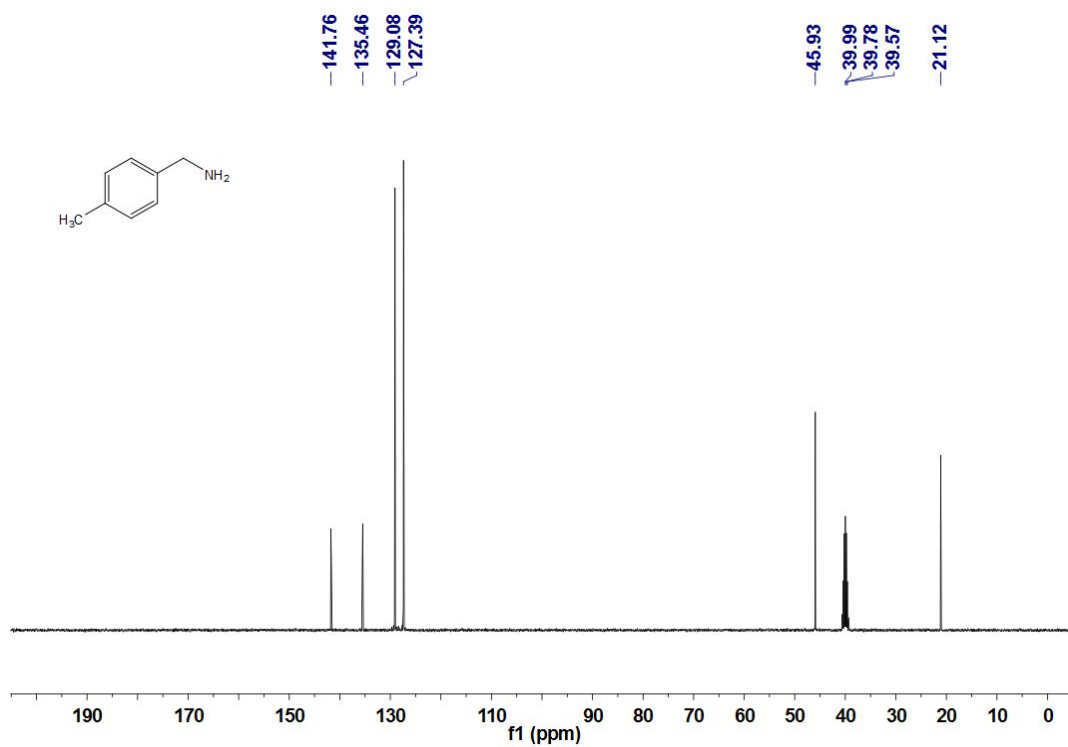

<sup>13</sup>C NMR of (4-methylphenyl)methanamine

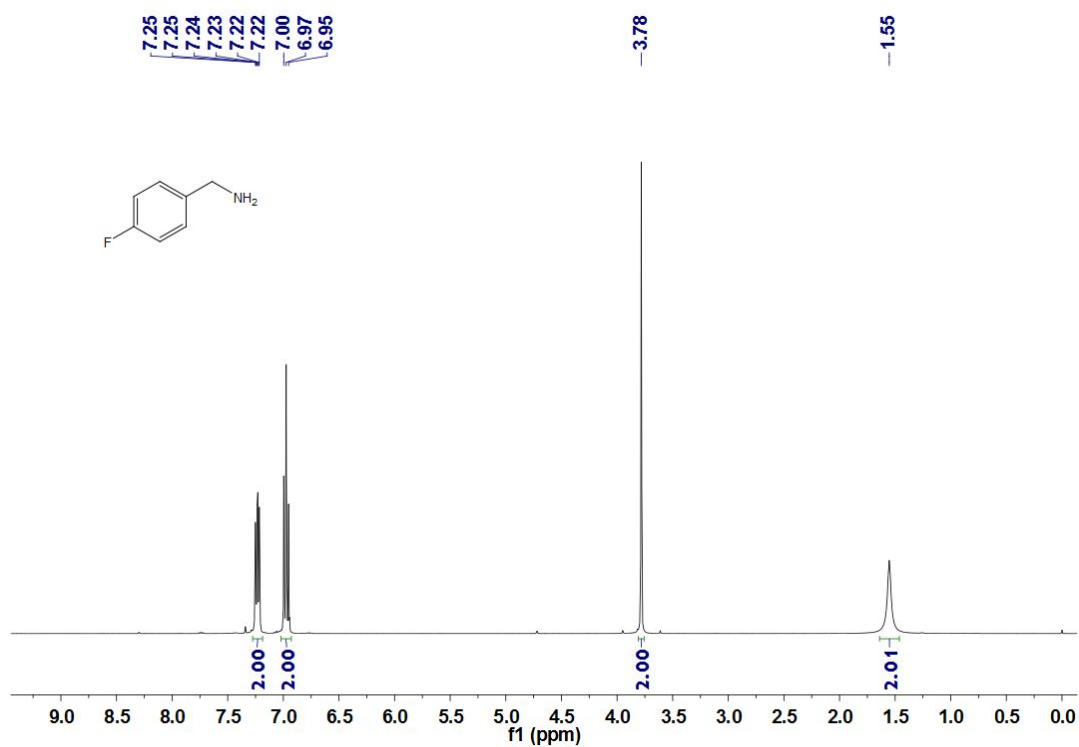

<sup>1</sup>H NMR of (4-fluorophenyl)methanamine

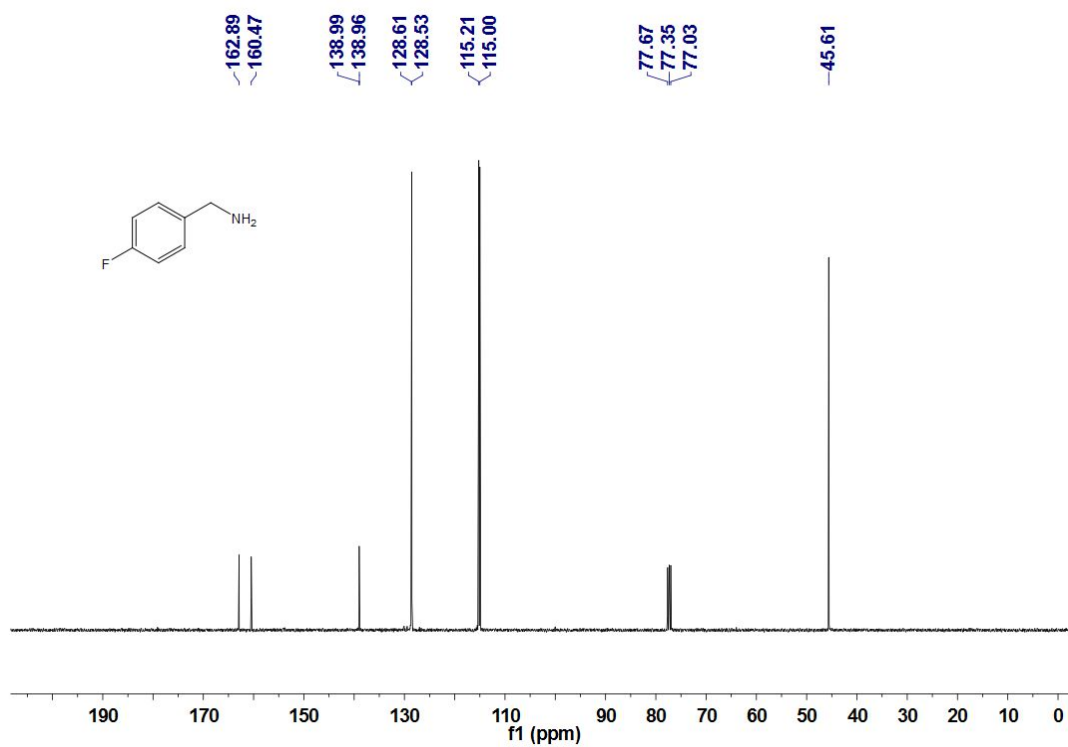

<sup>13</sup>C NMR of (4-fluorophenyl)methanamine

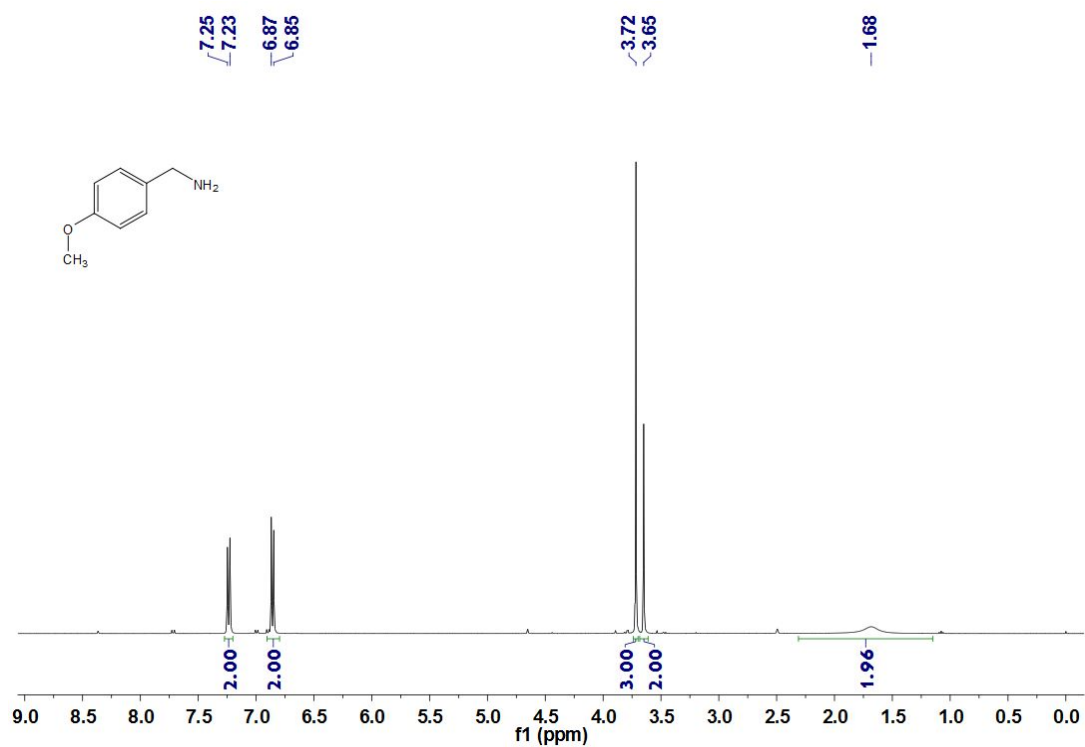

<sup>1</sup>H NMR of (4-methoxyphenyl)methanamine

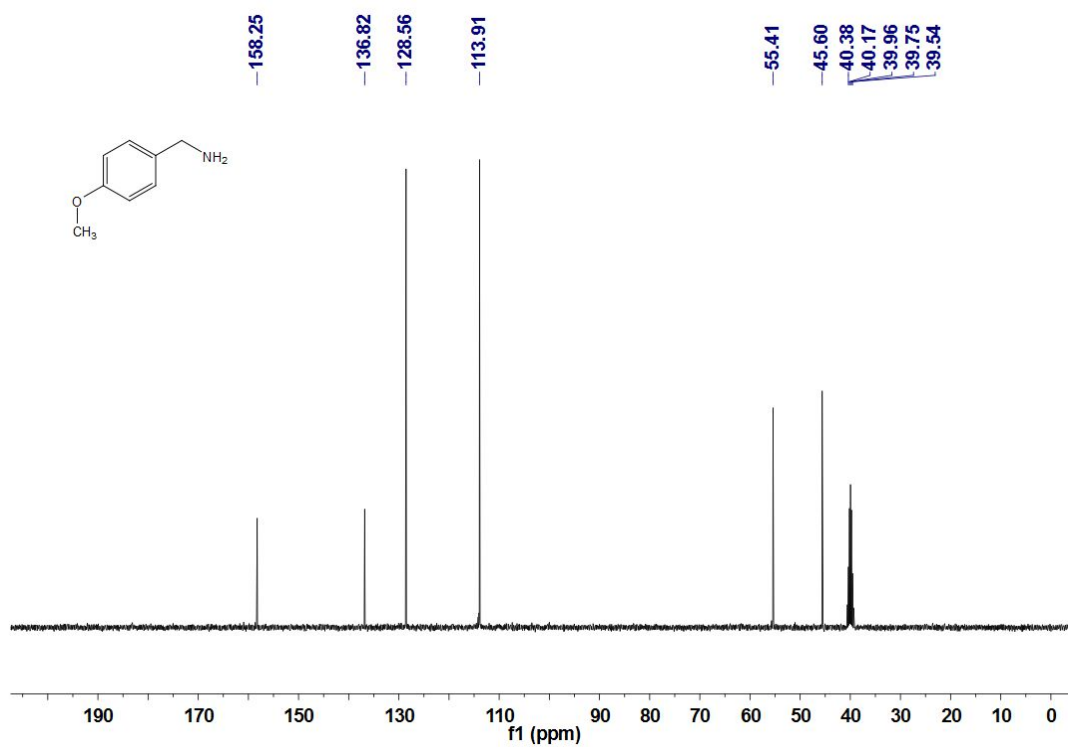

<sup>13</sup>C NMR of (4-methoxyphenyl)methanamine

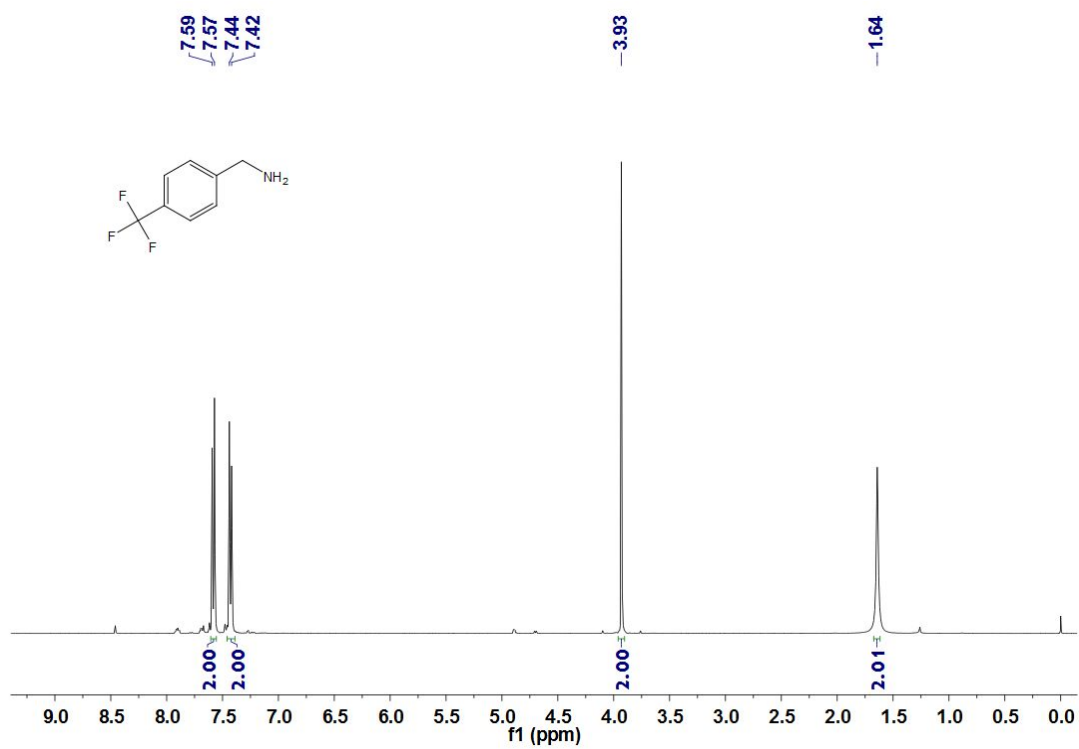

<sup>1</sup>H NMR of 4-(trifluoromethyl)phenyl)methanamine

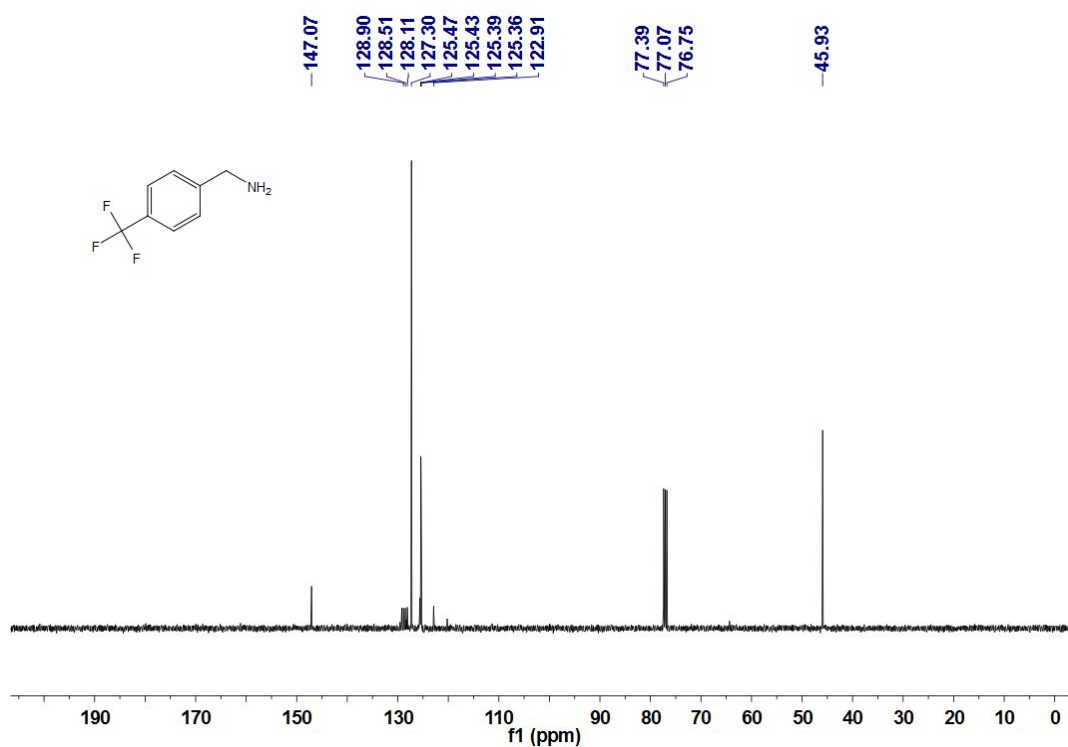

<sup>13</sup>C NMR of 4-(trifluoromethyl)phenylmethanamine

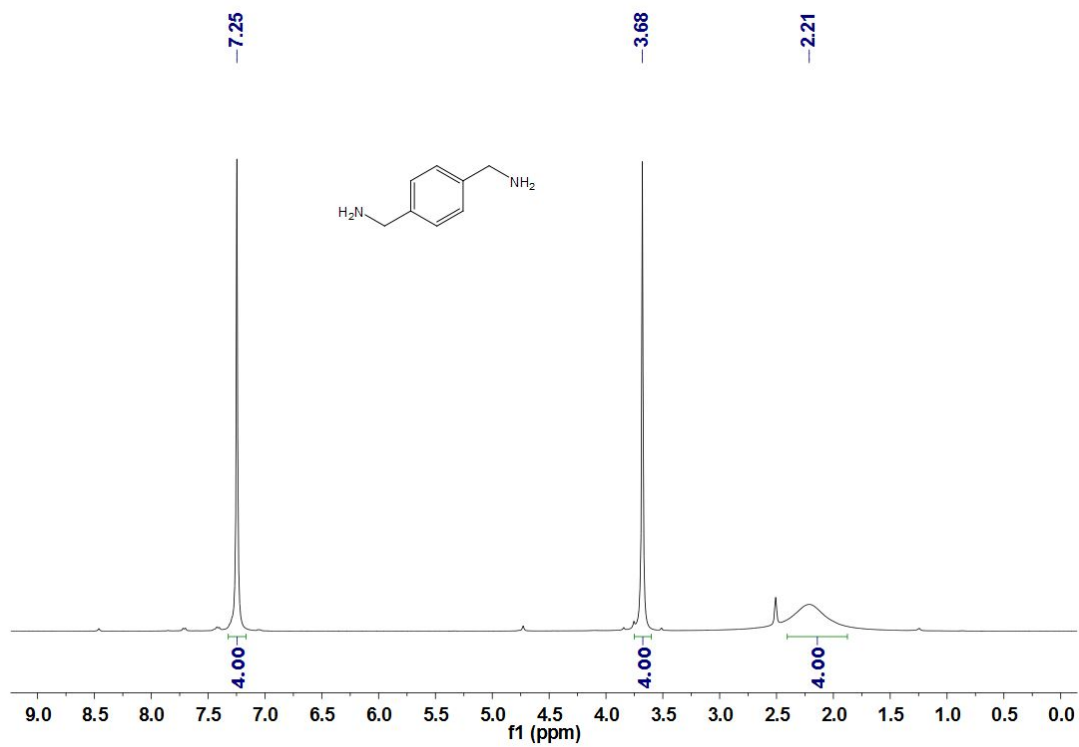

<sup>1</sup>H NMR of 1,4-phenylenedimethanamine

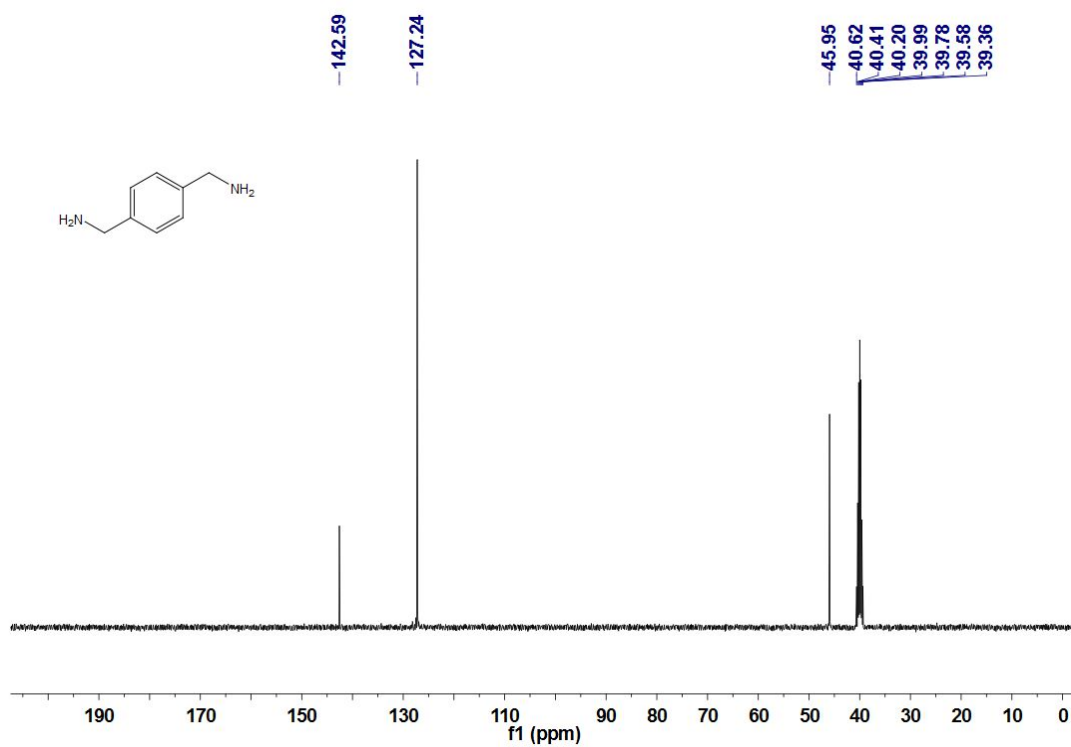

<sup>13</sup>C NMR of 1,4-phenylenedimethanamine

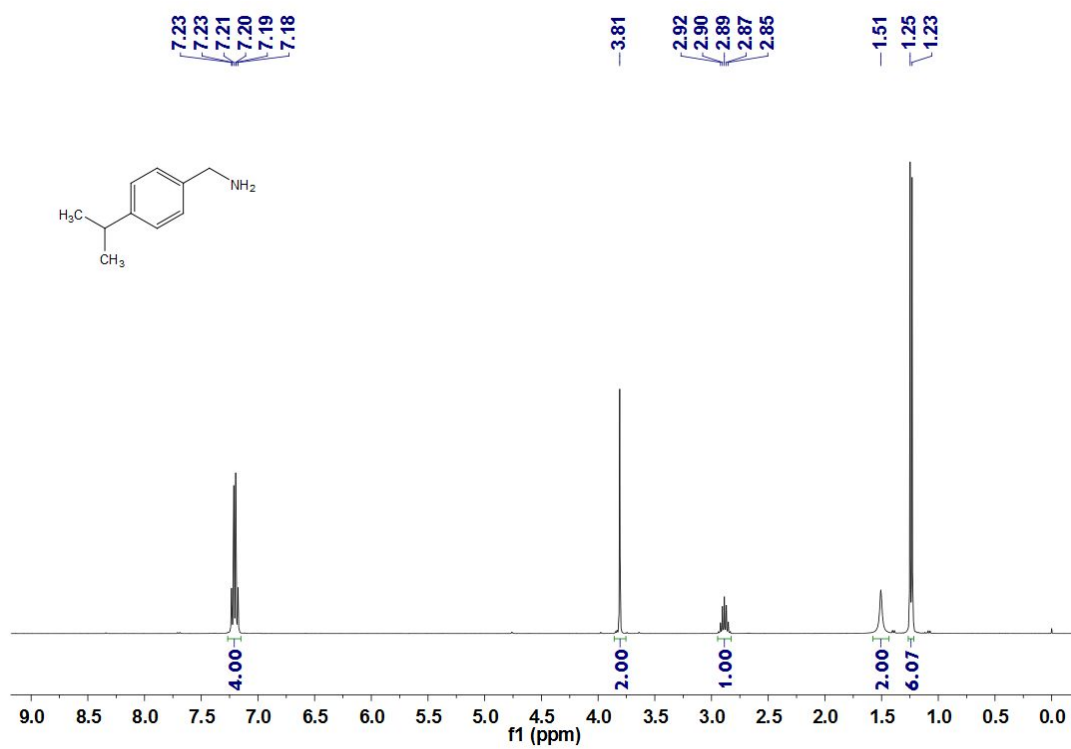

<sup>1</sup>H NMR of (4-isopropylphenyl)methanamine

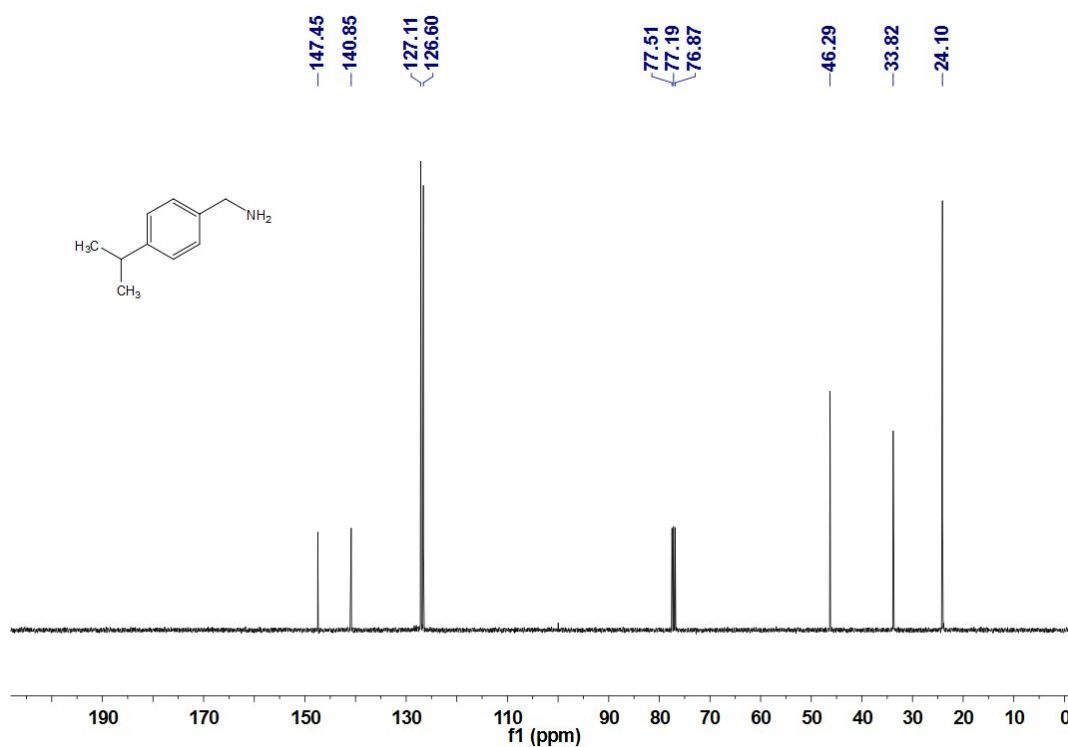

<sup>13</sup>C NMR of (4-isopropylphenyl)methanamine

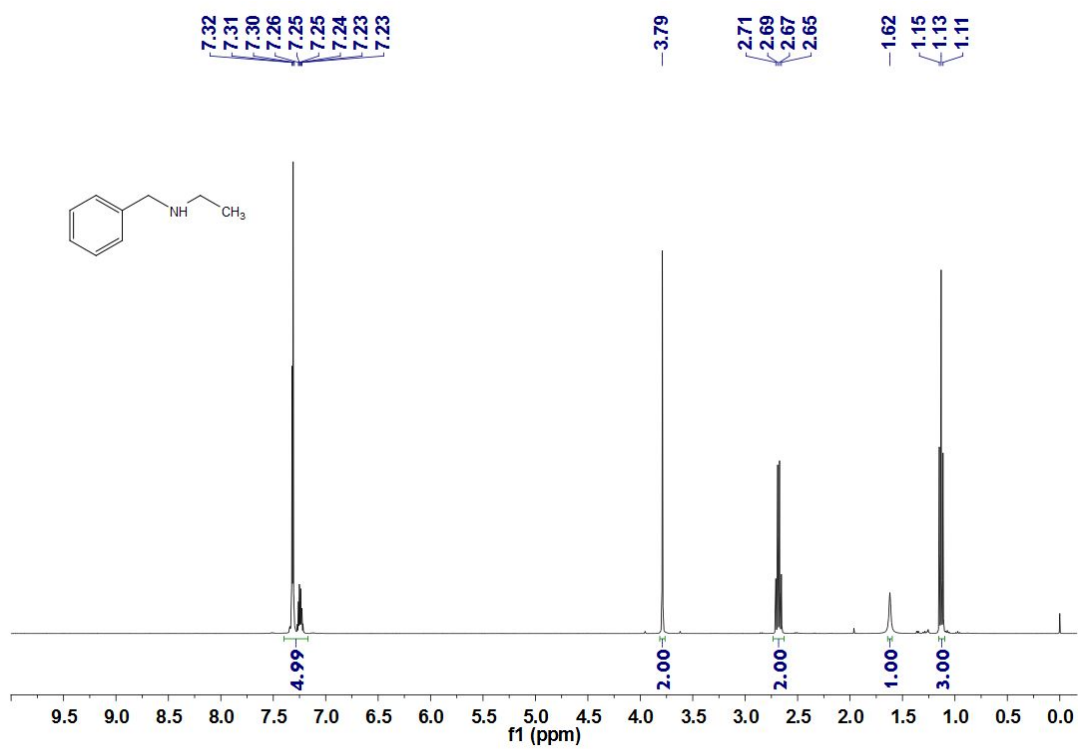

<sup>1</sup>H NMR of N-ethylbenzylamine

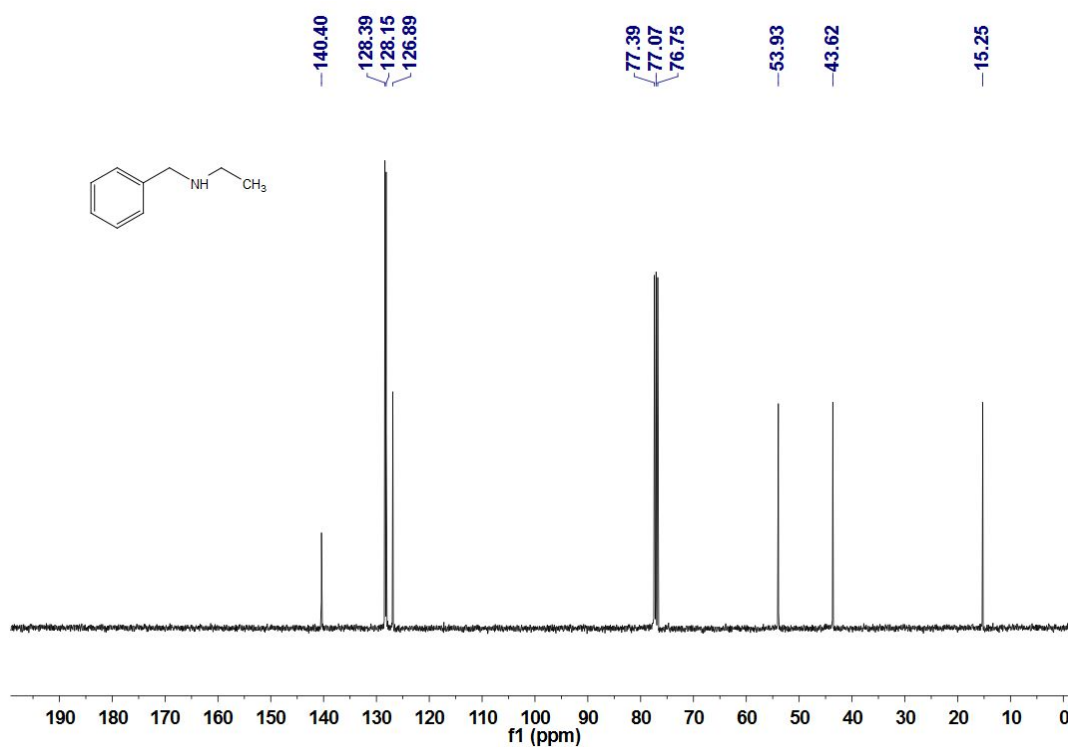

<sup>13</sup>C NMR of N-ethylbenzylamine

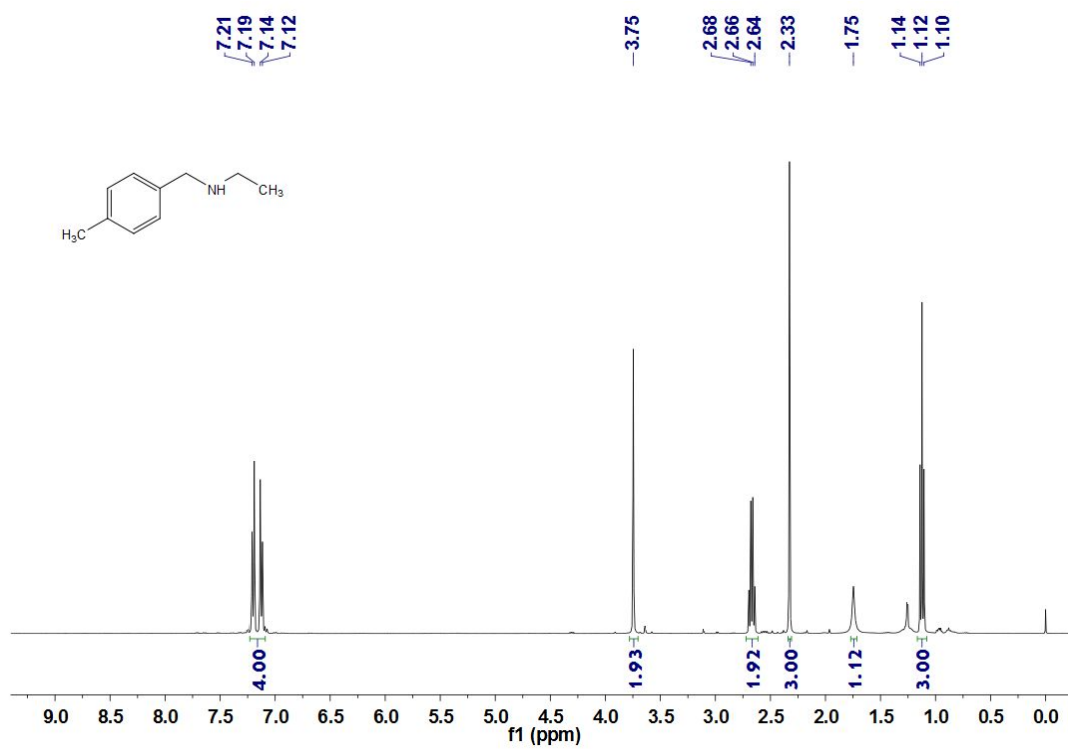

<sup>1</sup>H NMR of N-ethyl-4-methylbenzylamine

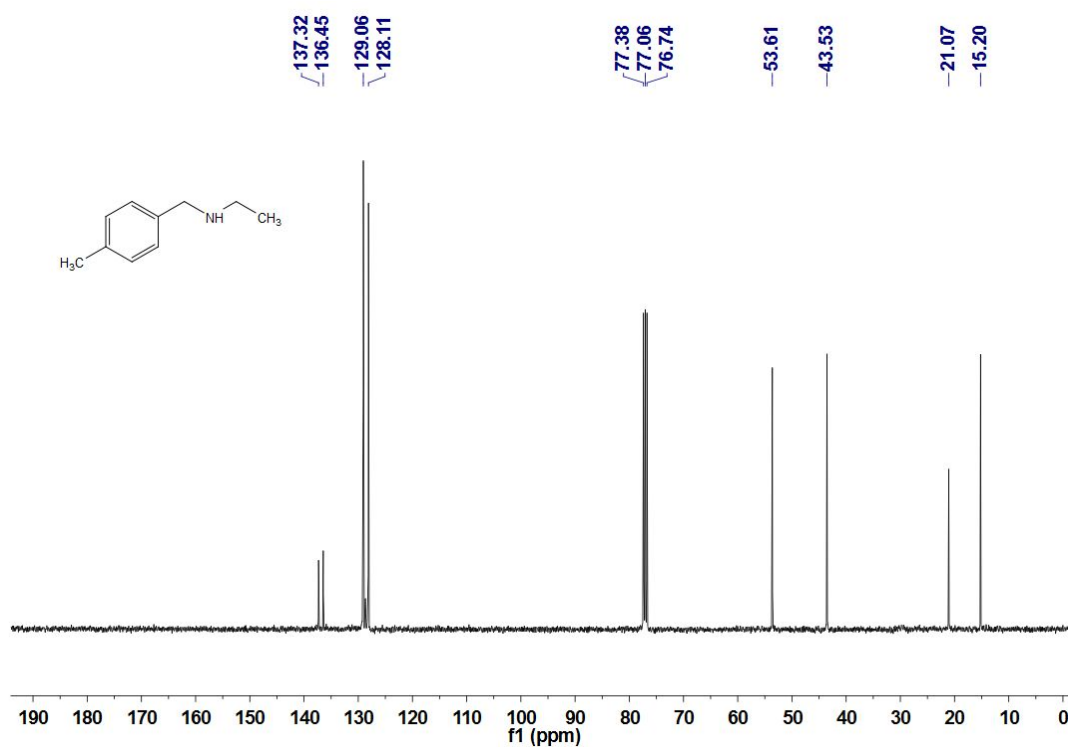

<sup>13</sup>C NMR of N-ethyl-4-methylbenzylamine

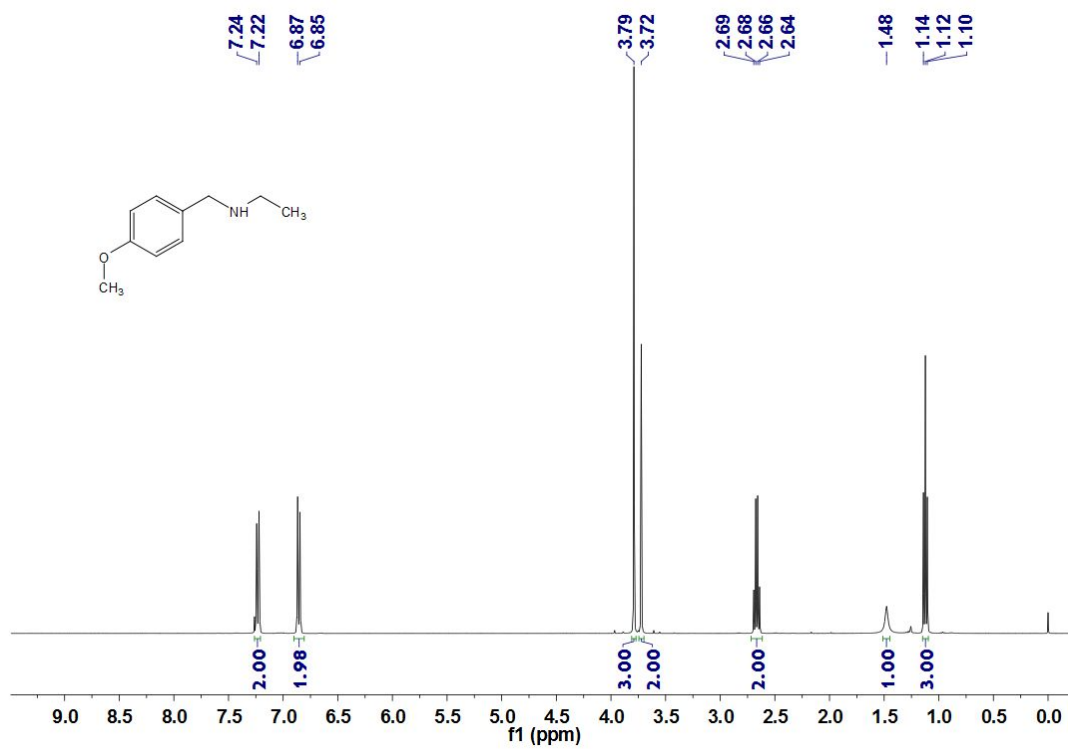

<sup>1</sup>H NMR of N-ethyl-4-methoxybenzylamine



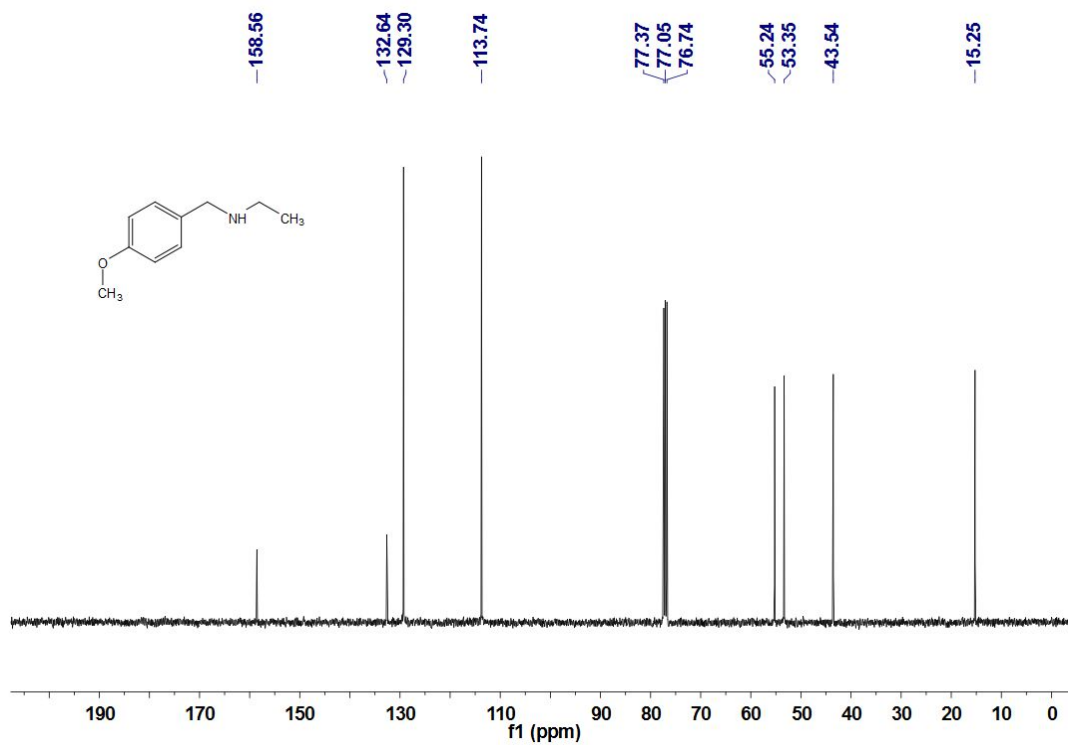

<sup>13</sup>C NMR of N-ethyl-4-methoxybenzylamine

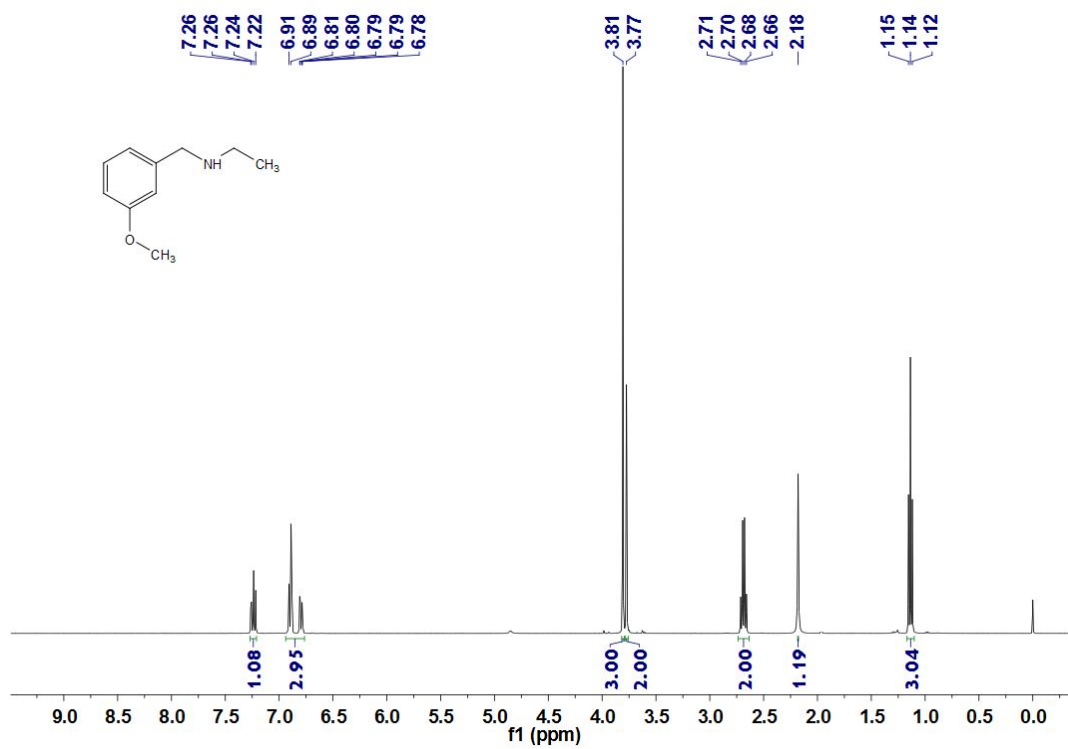

<sup>1</sup>H NMR of N-ethyl-3-methoxybenzylamine

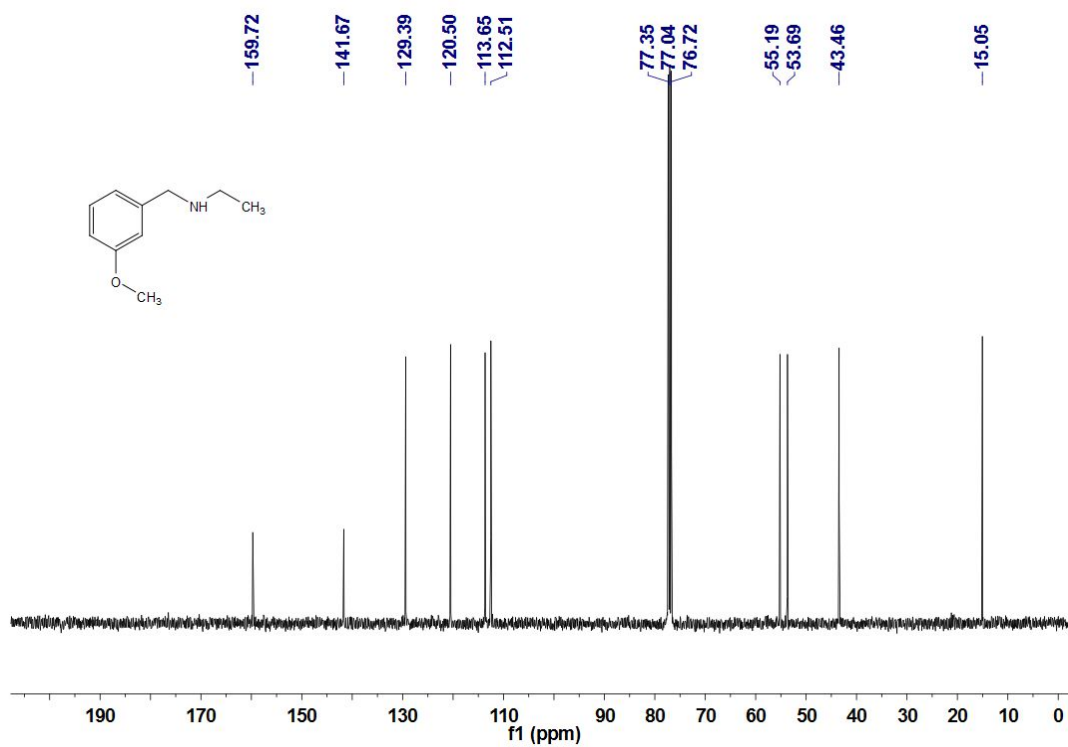

<sup>13</sup>C NMR of N-ethyl-3-methoxybenzylamine

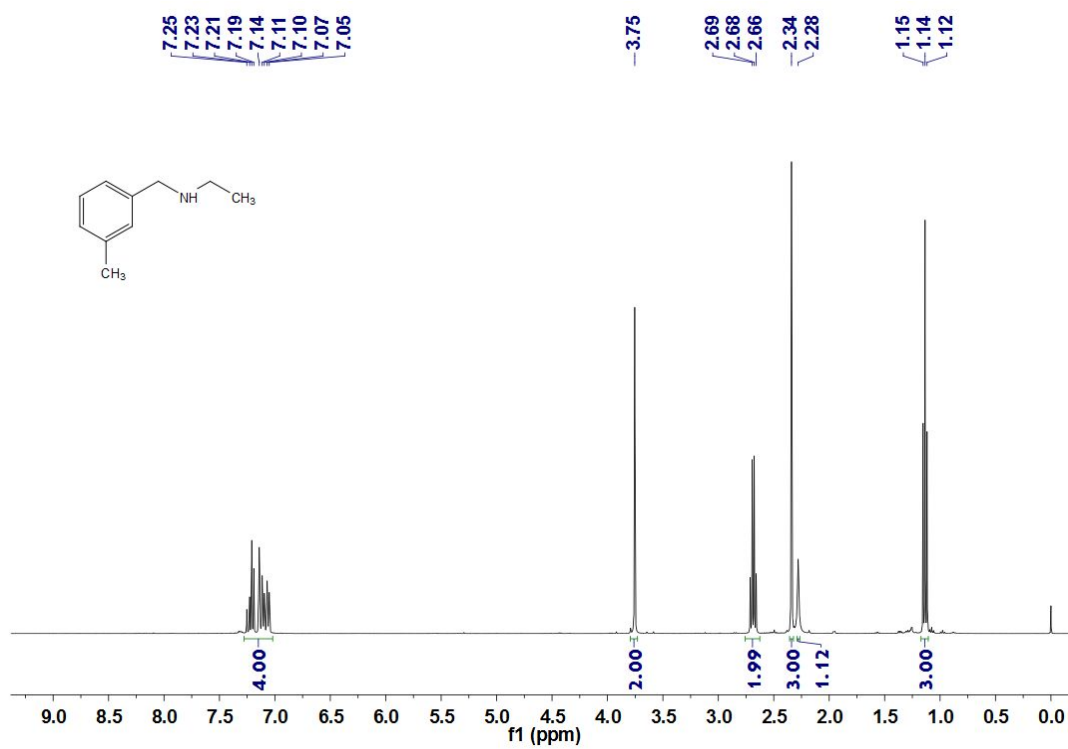

<sup>1</sup>H NMR of N-ethyl-3-methylbenzylamine

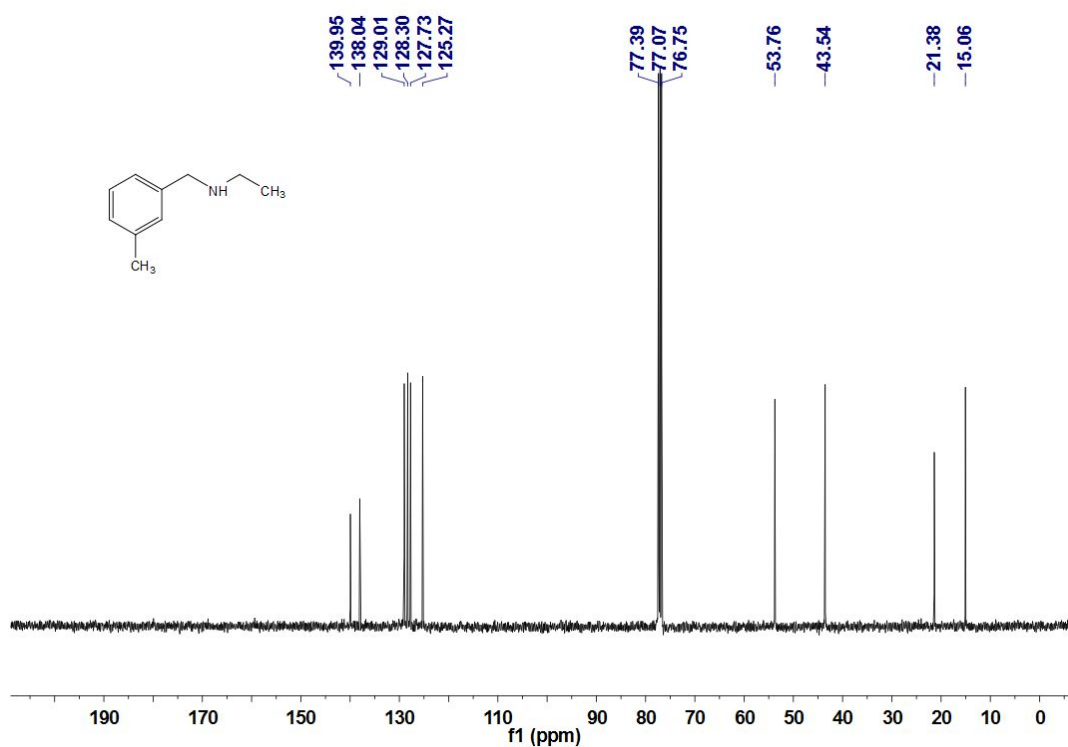

<sup>13</sup>C NMR of N-ethyl-3-methylbenzylamine

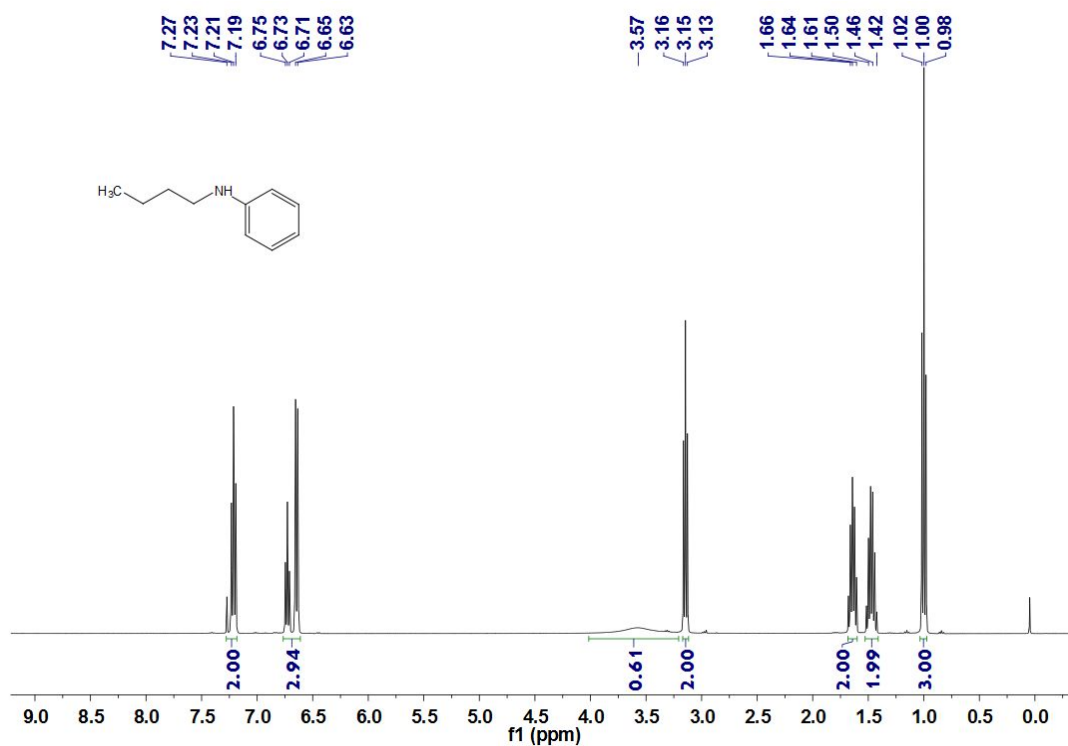

<sup>1</sup>H NMR of N-butylaniline

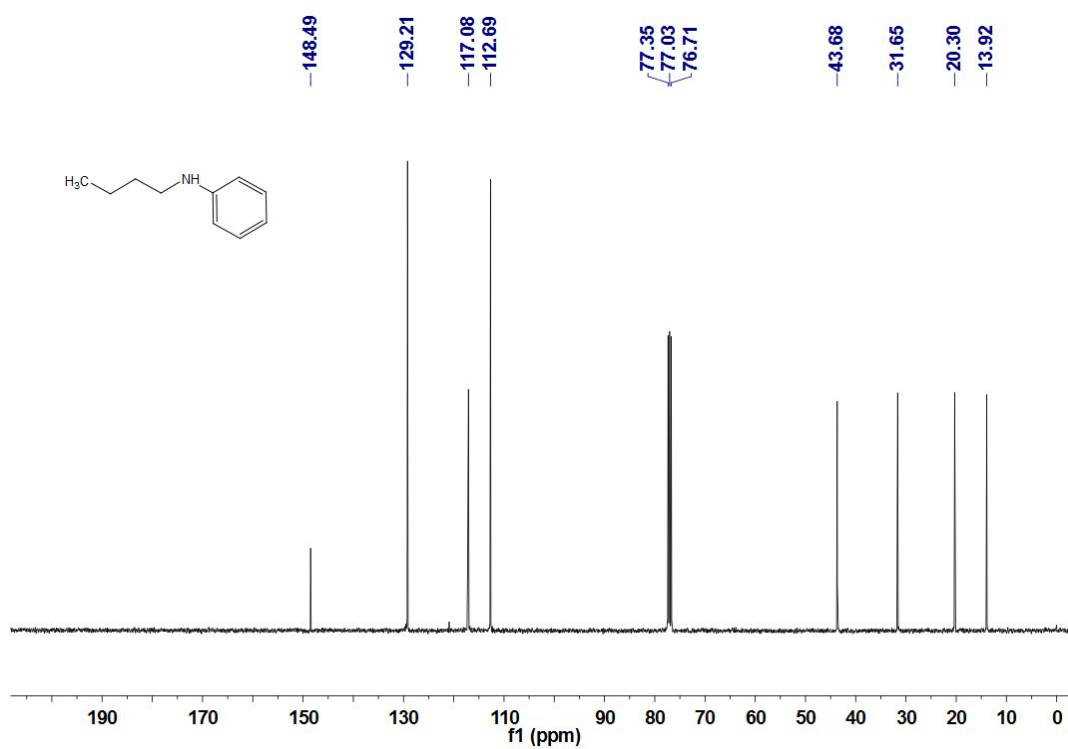

<sup>13</sup>C NMR of N-butylaniline

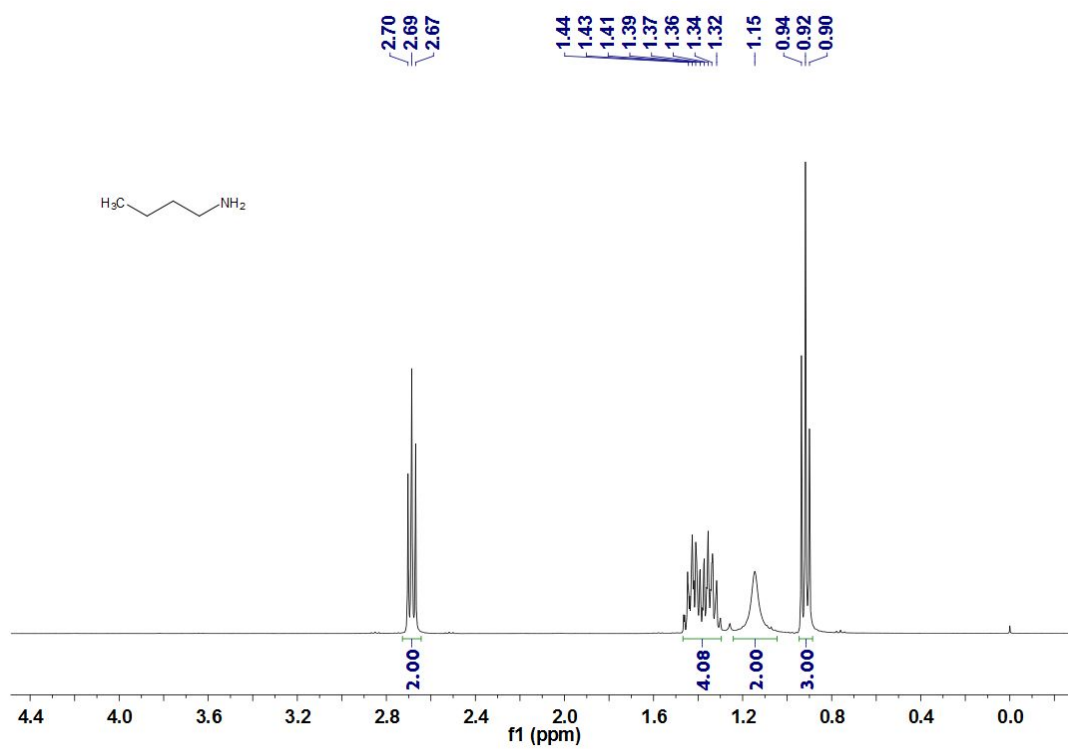

<sup>1</sup>H NMR of butan-1-amine

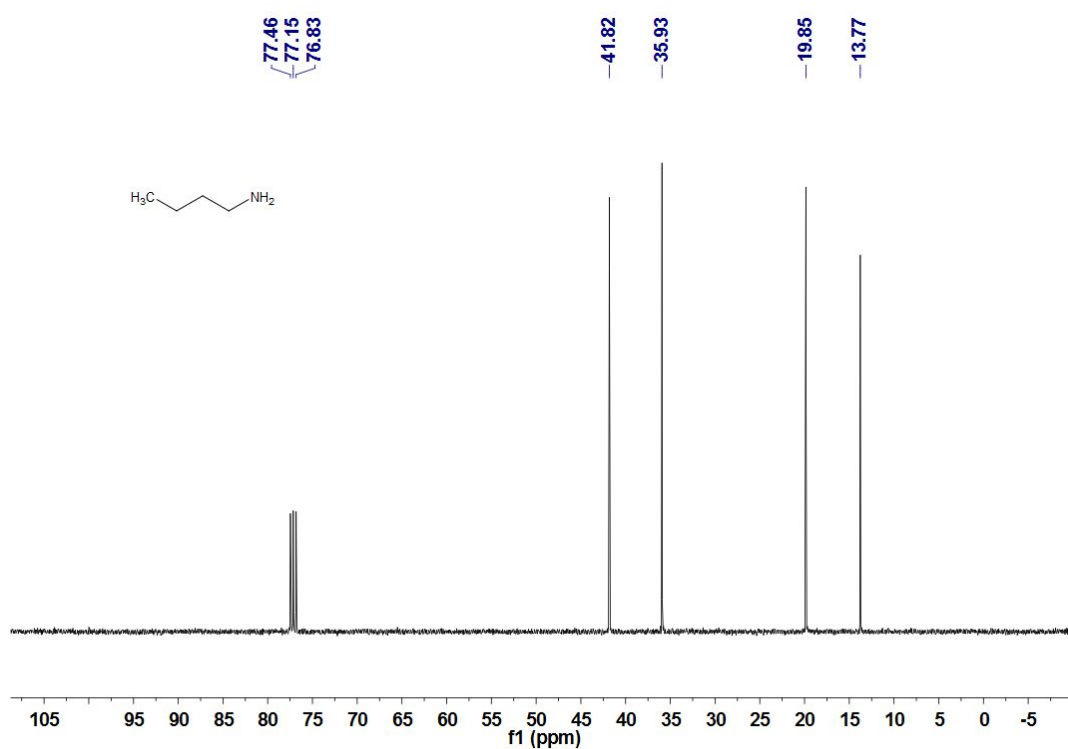

$^{13}\text{C}$  NMR of butan-1-amine

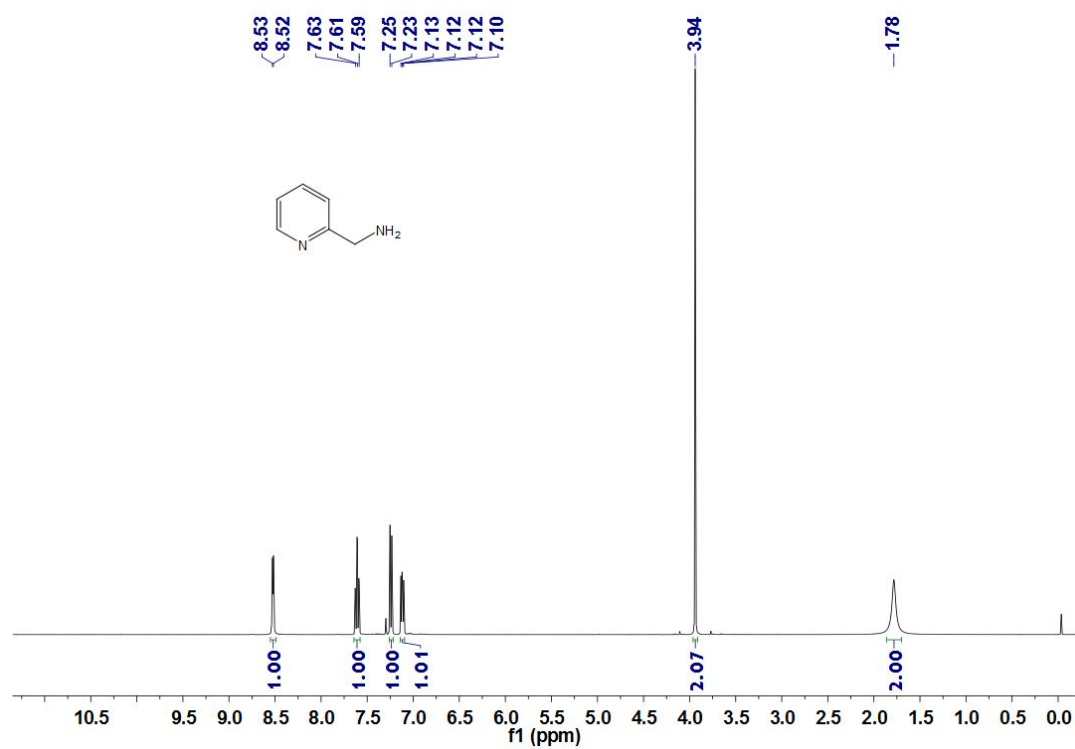

$^1\text{H}$  NMR of 2-(aminomethyl)pyridine

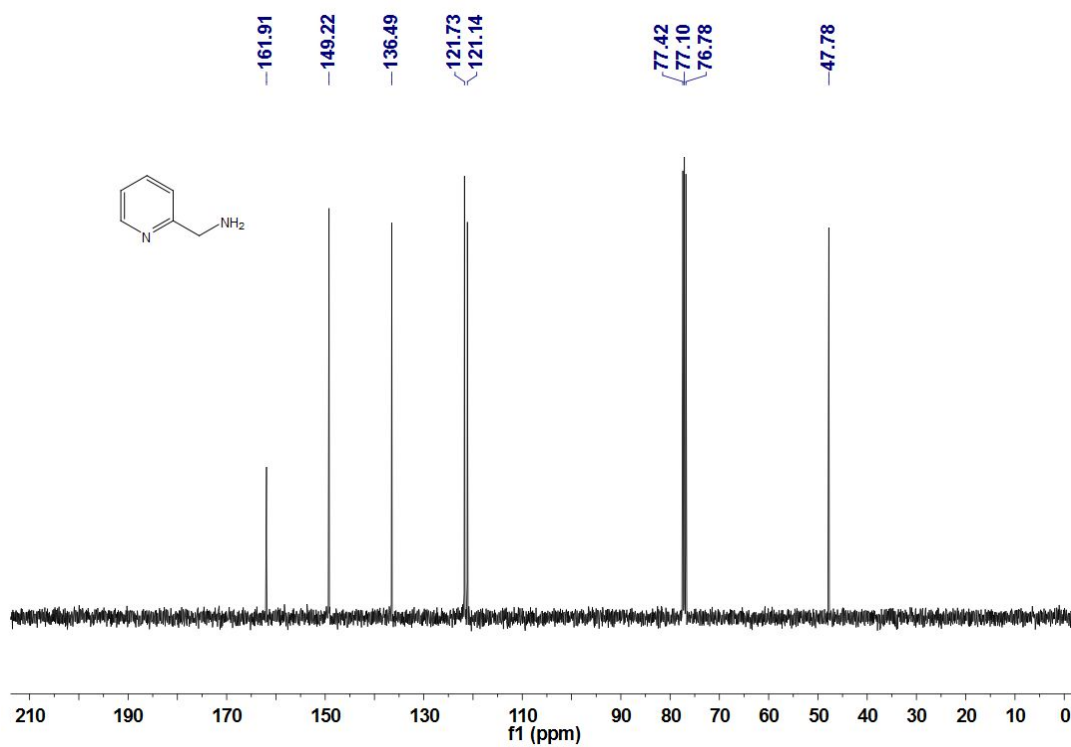

<sup>13</sup>C NMR of 2-(aminomethyl)pyridine

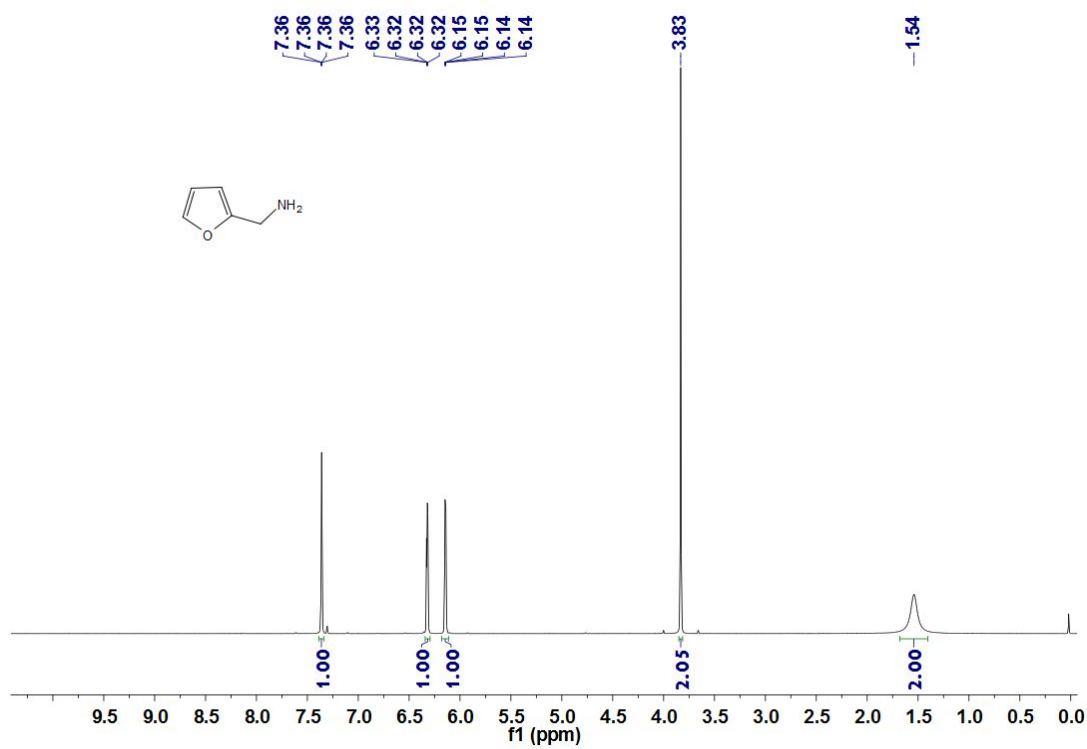

<sup>1</sup>H NMR of 2-furfurylamine

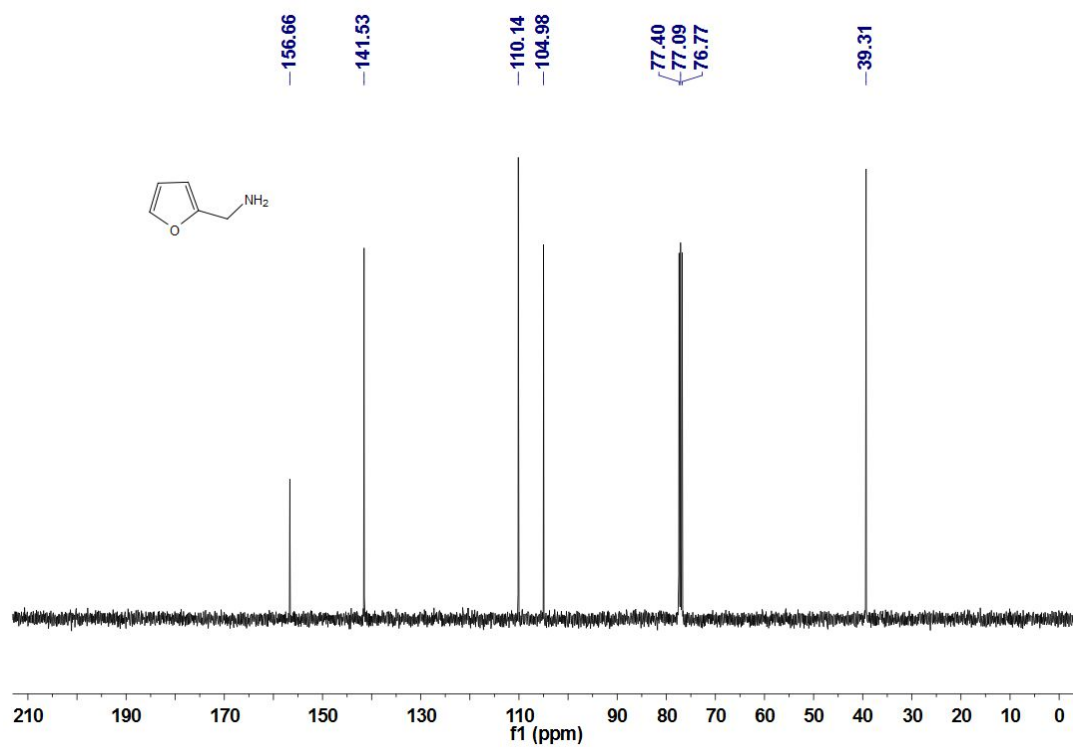

$^{13}\text{C}$  NMR of 2-furfurylamine

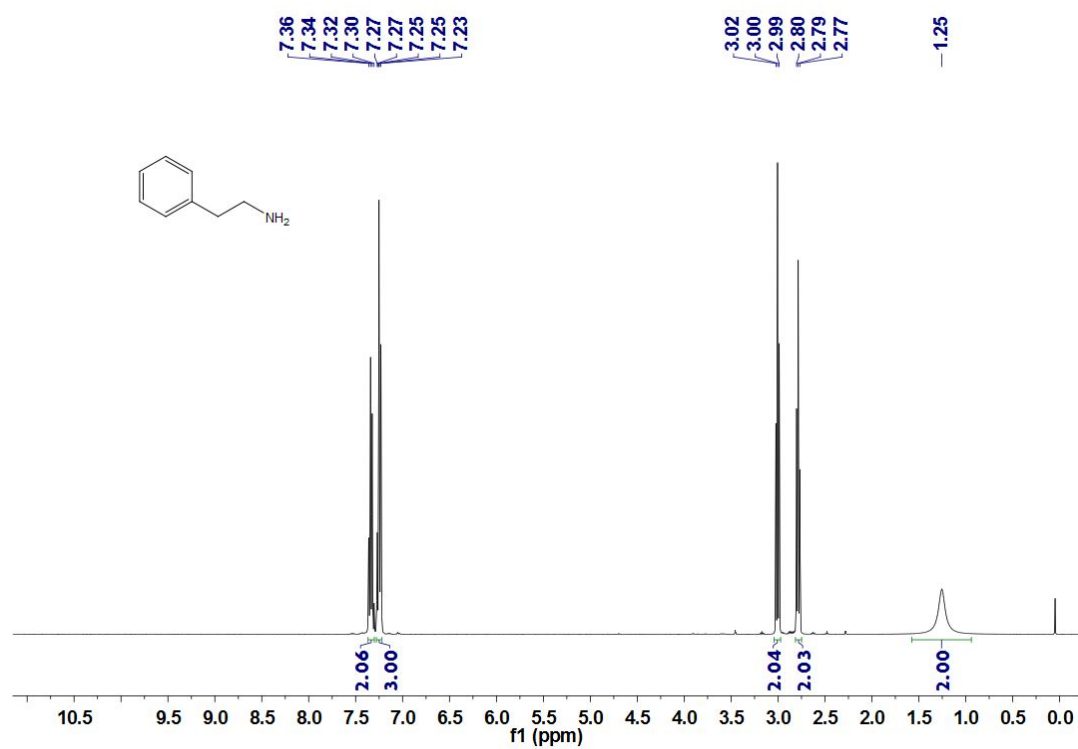

$^1\text{H}$  NMR of 2-phenylethylamine

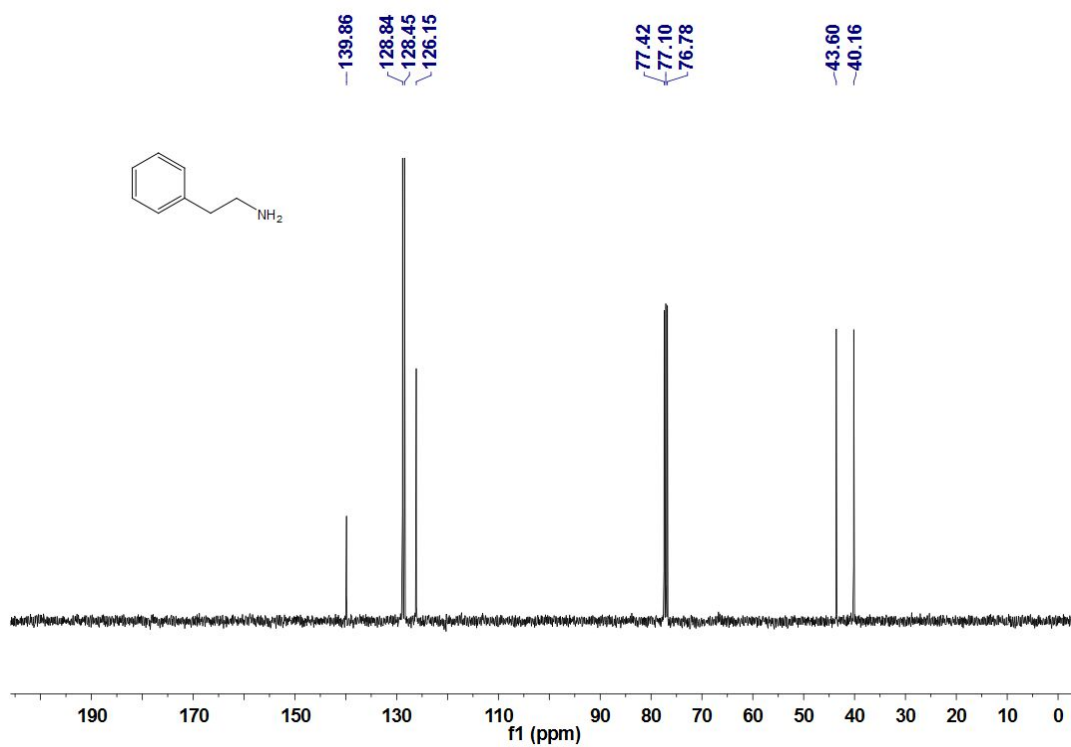

<sup>13</sup>C NMR of 2-phenylethylamine

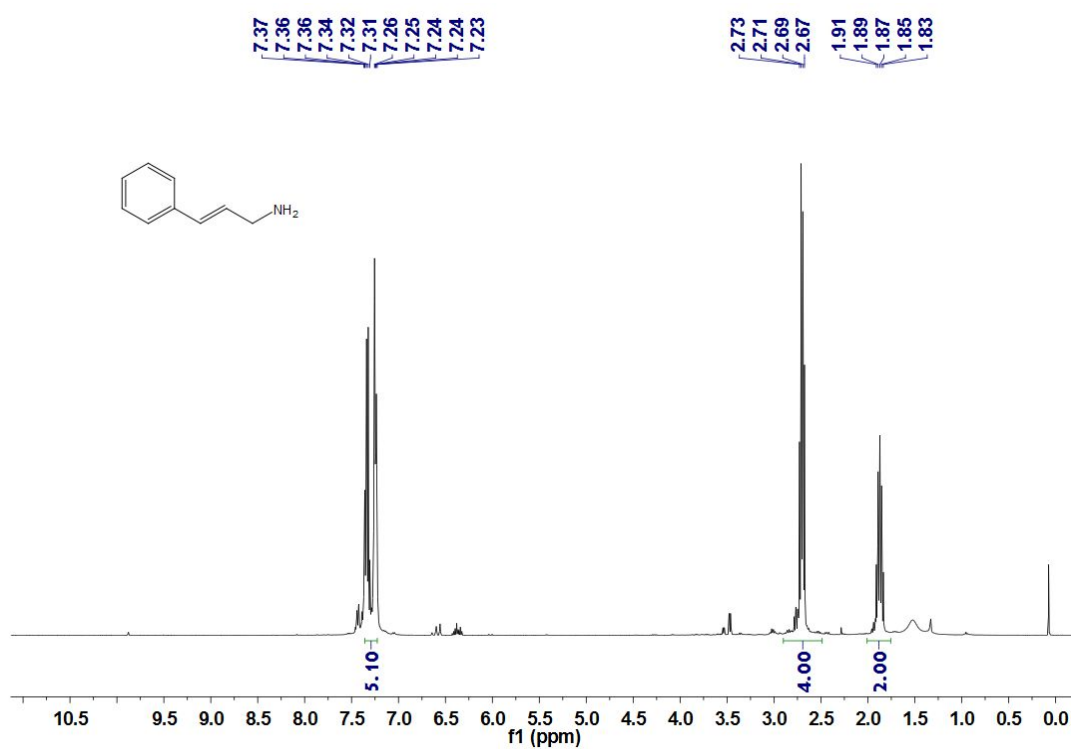

<sup>1</sup>H NMR of 3-phenyl-2-propen-1-amine



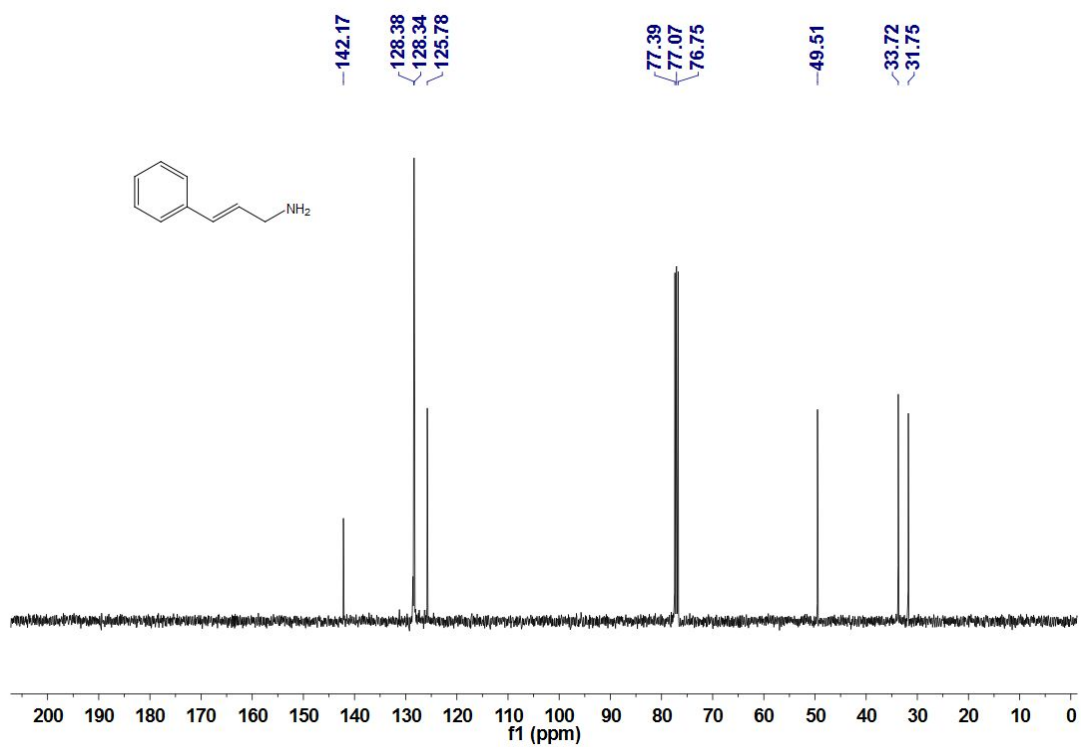

$^{13}\text{C}$  NMR of 3-phenyl-2-propen-1-amine

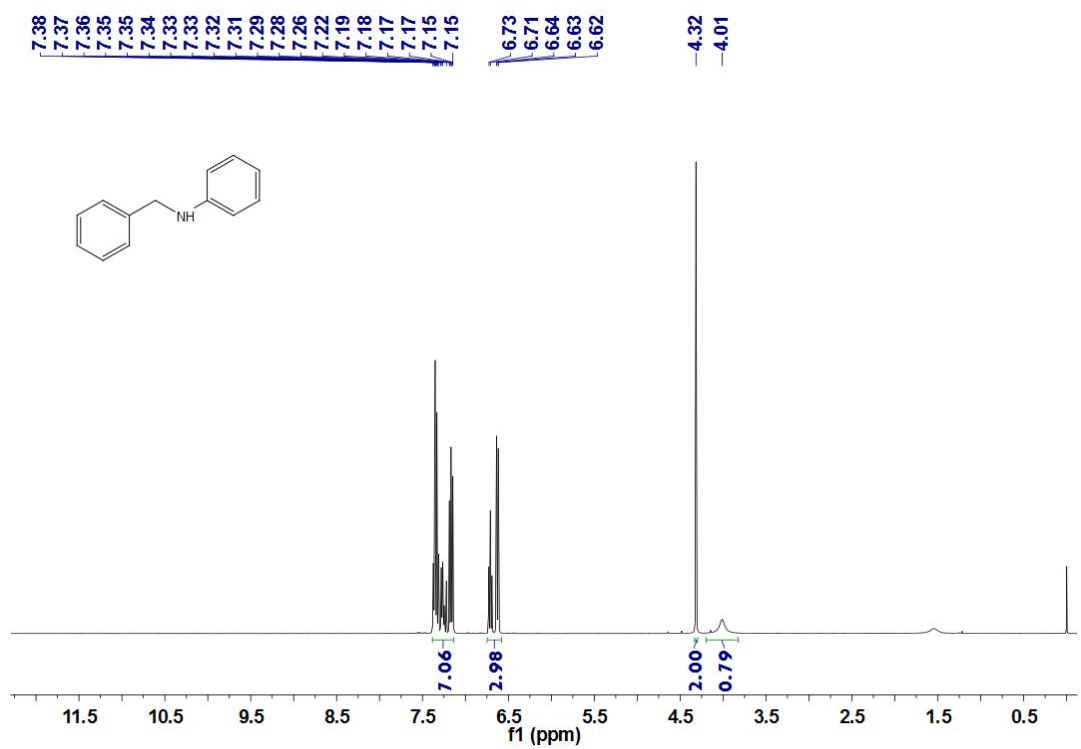

$^1\text{H}$  NMR of N-benzylaniline

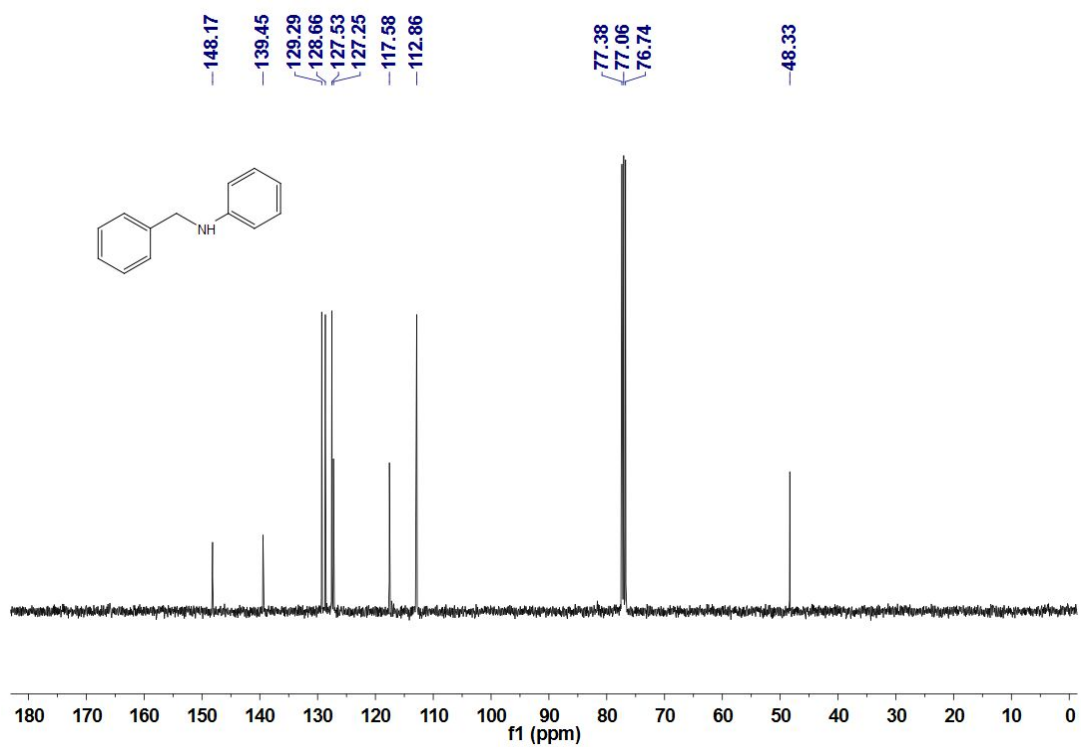

<sup>13</sup>C NMR of N-benzylaniline

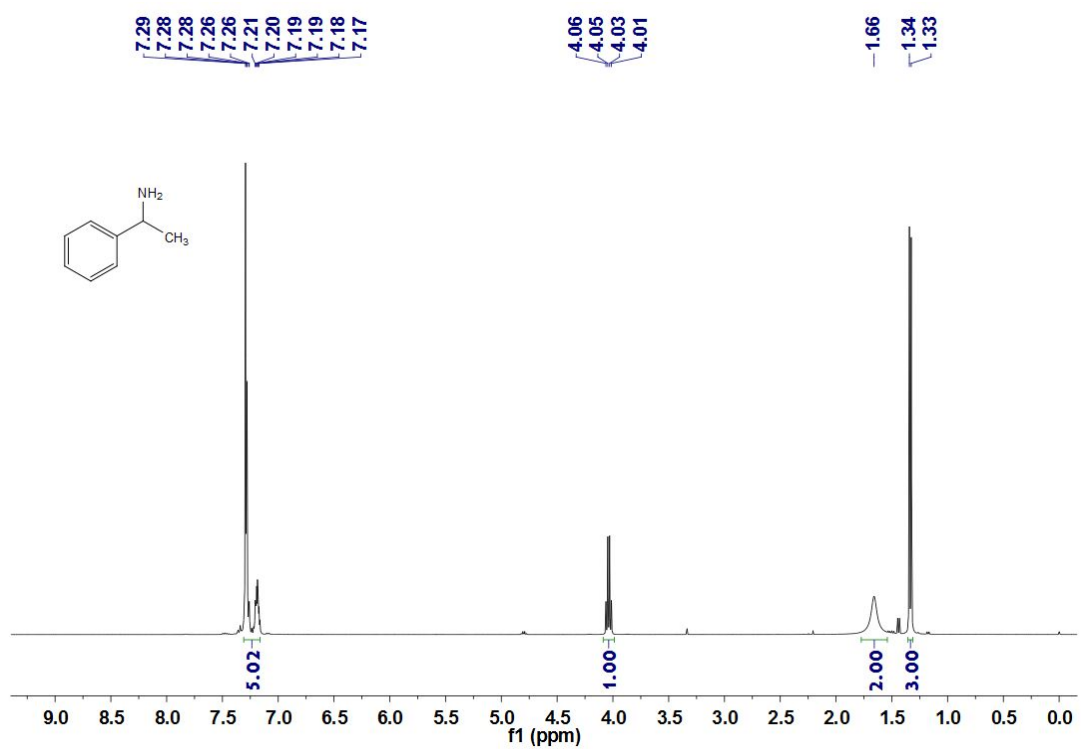

<sup>1</sup>H NMR of 1-phenylethylamine

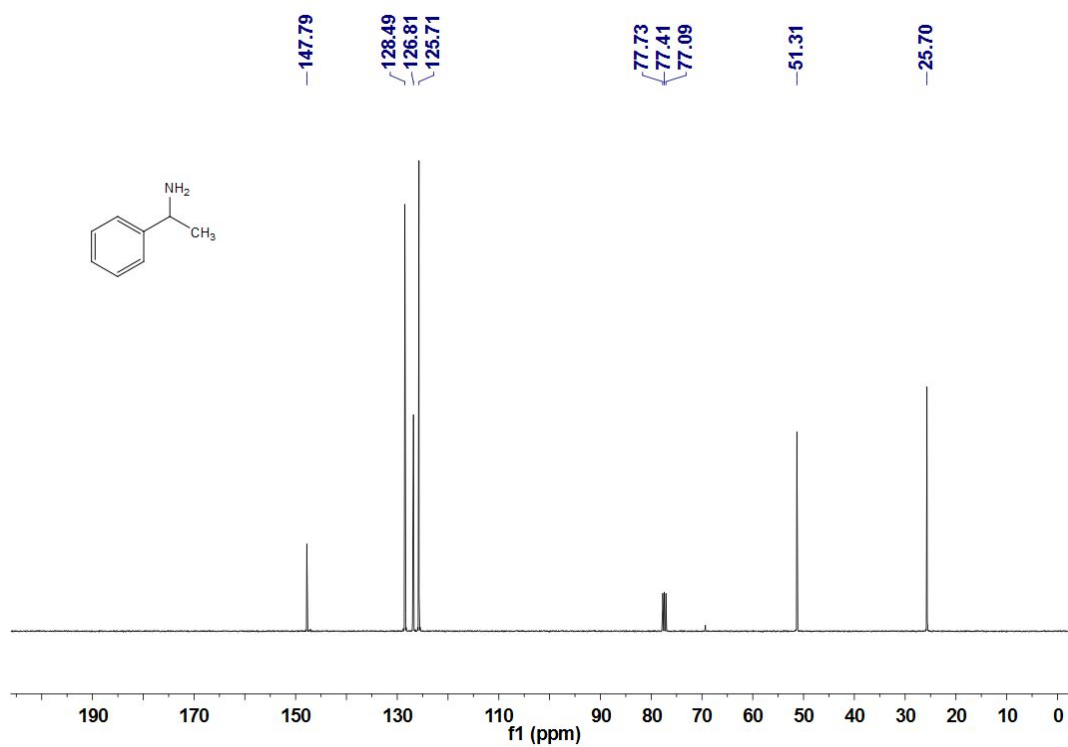

<sup>13</sup>C NMR of 1-phenylethylamine

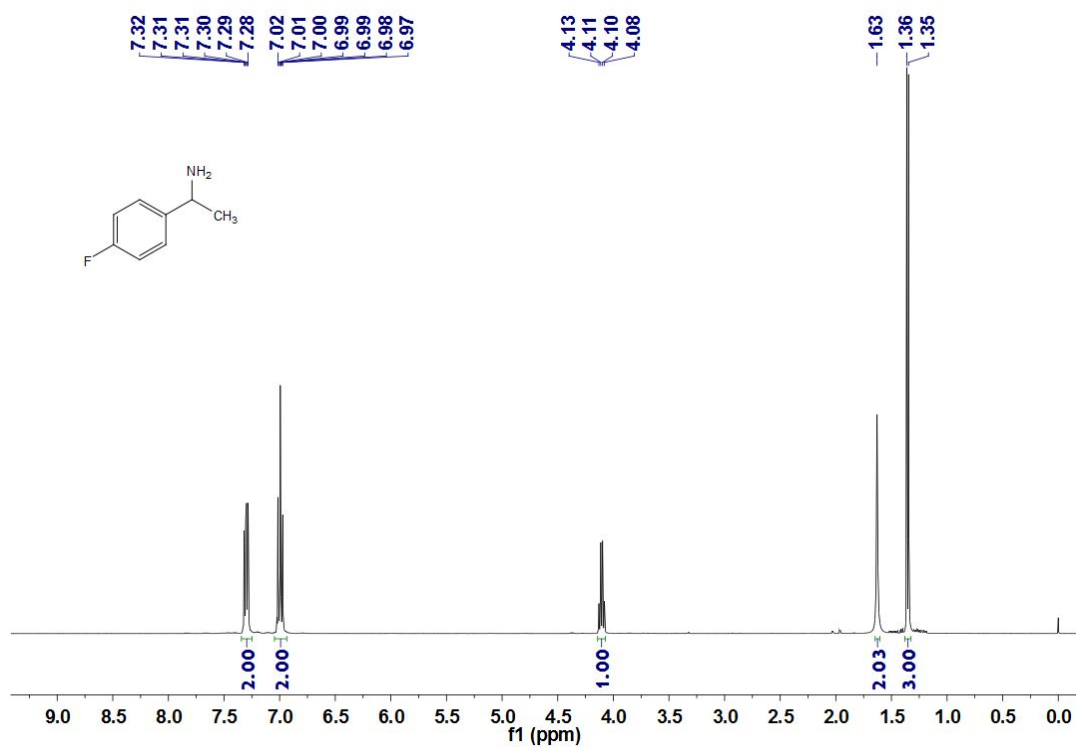

<sup>1</sup>H NMR of 1-(4-fluorophenyl)ethanamine

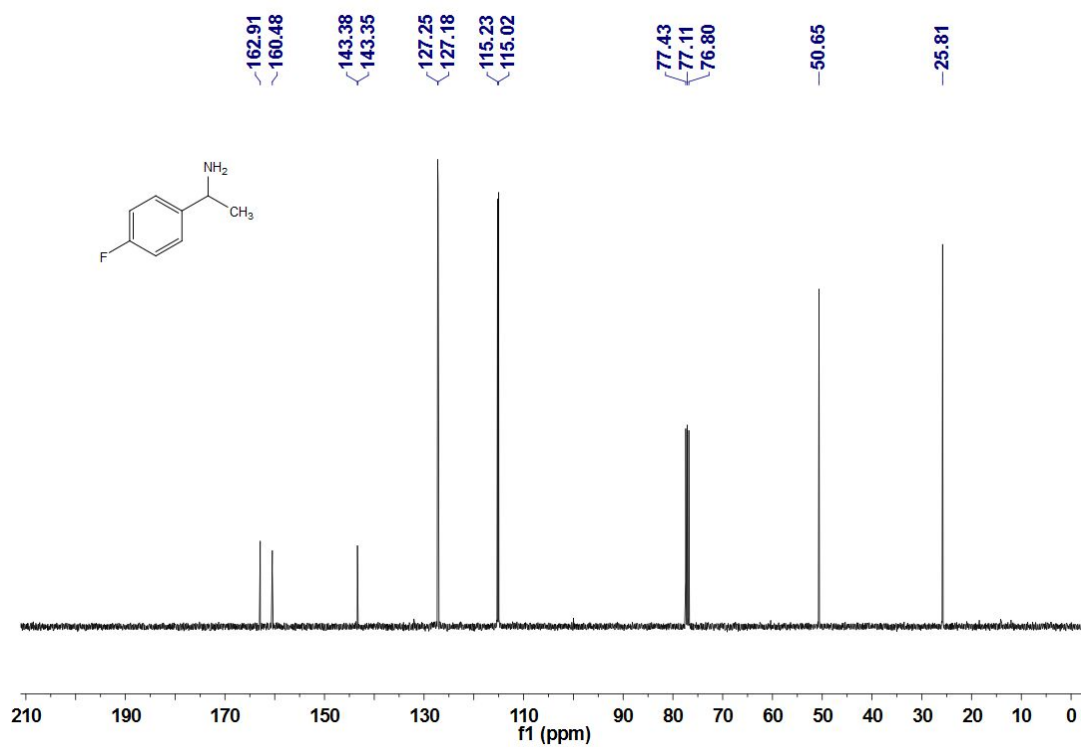

<sup>13</sup>C NMR of 1-(4-fluorophenyl)ethanamine

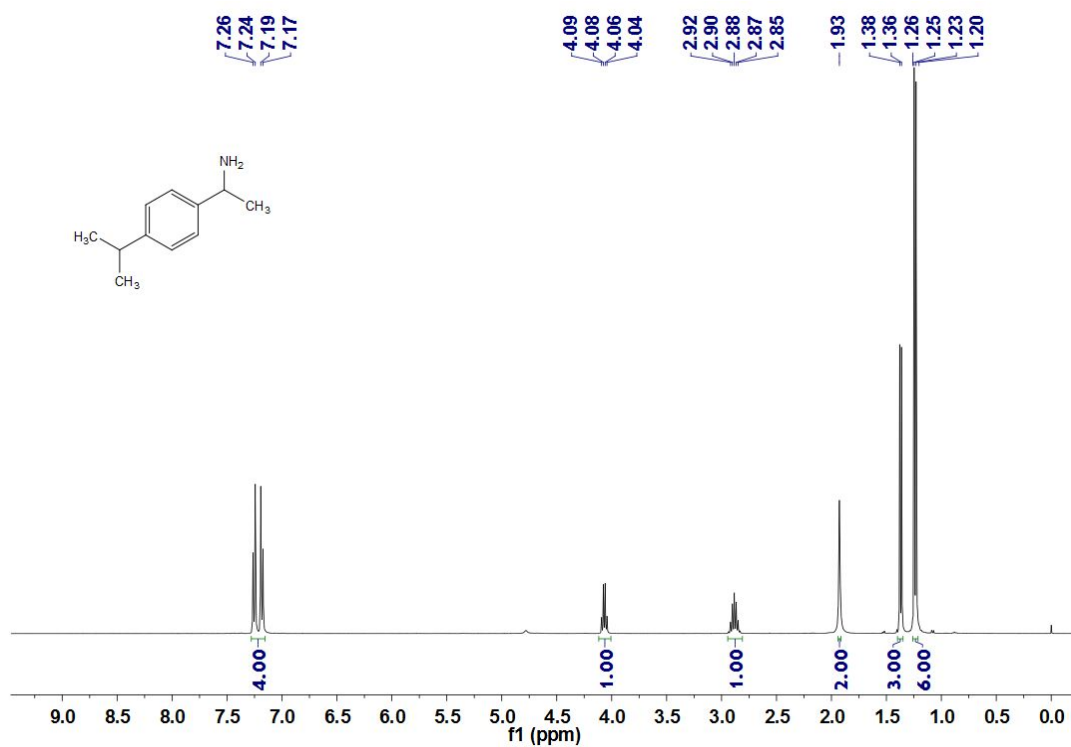

<sup>1</sup>H NMR of 1-(4-isopropylphenyl)ethanamine

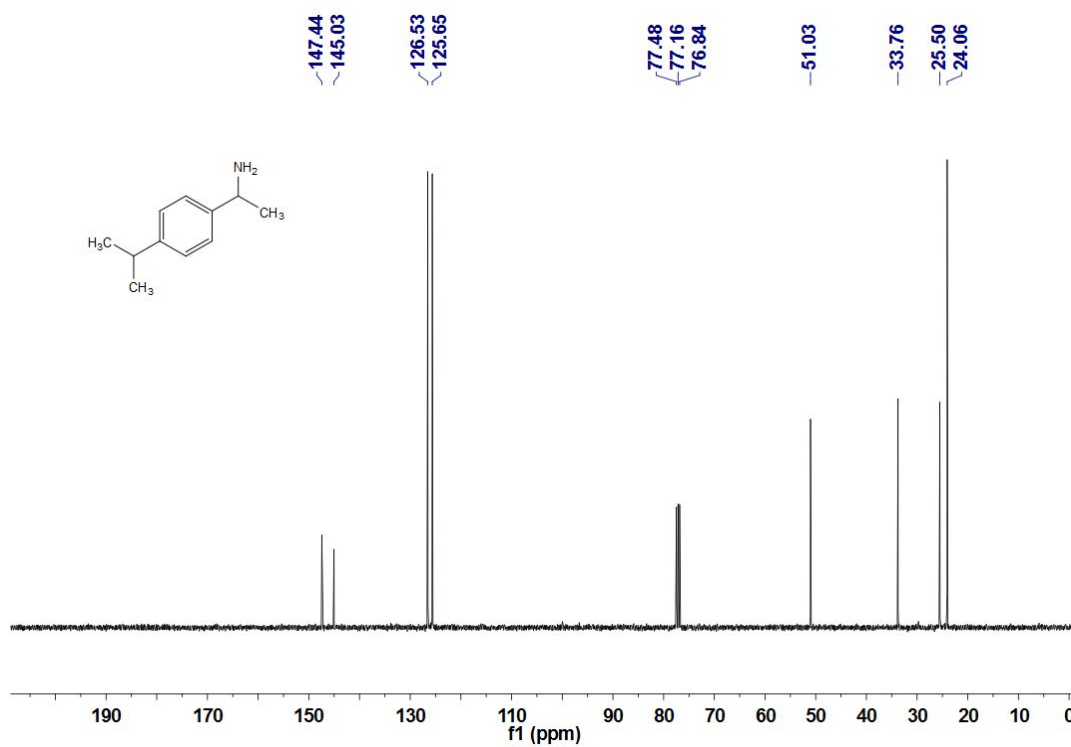

<sup>13</sup>C NMR of 1-(4-isopropylphenyl)ethanamine

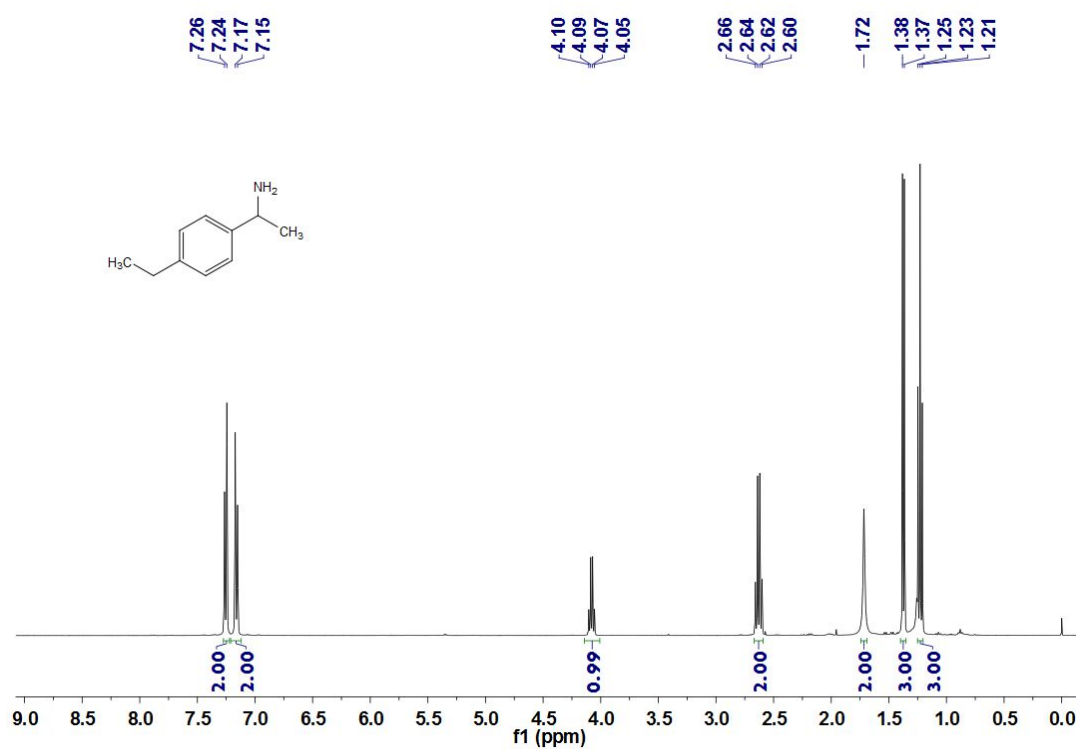

<sup>1</sup>H NMR of 1-(4-ethylphenyl)ethanamine

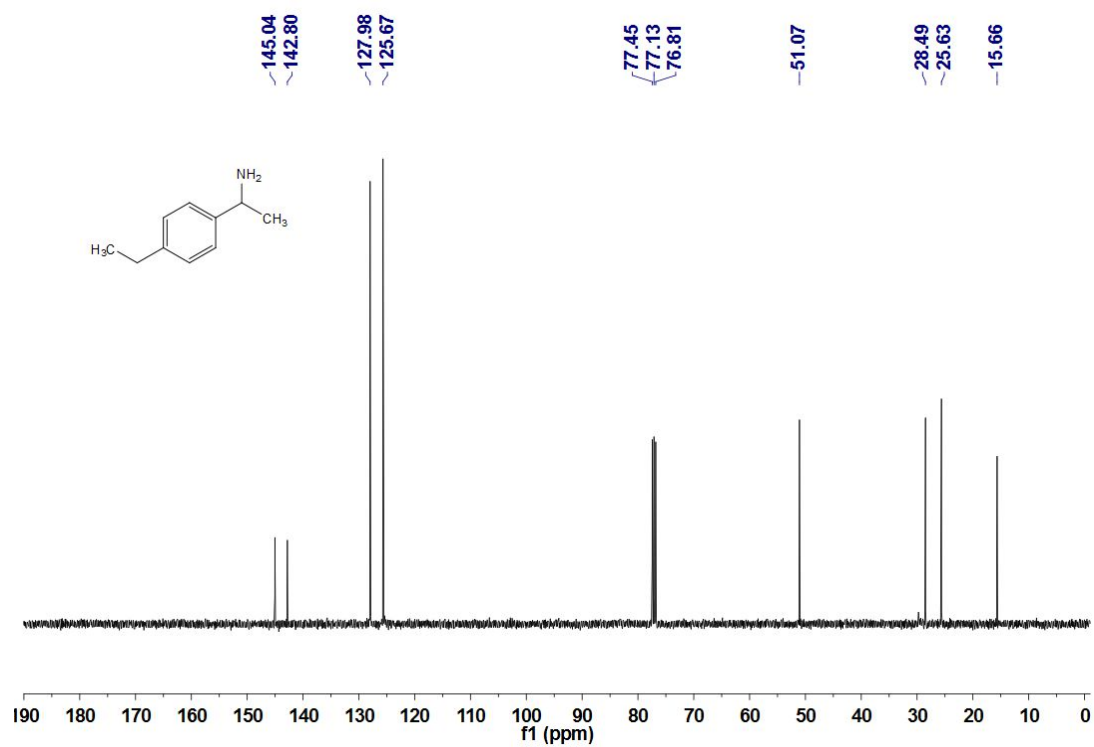

<sup>13</sup>C NMR of 1-(4-ethylphenyl)ethan-1-amine

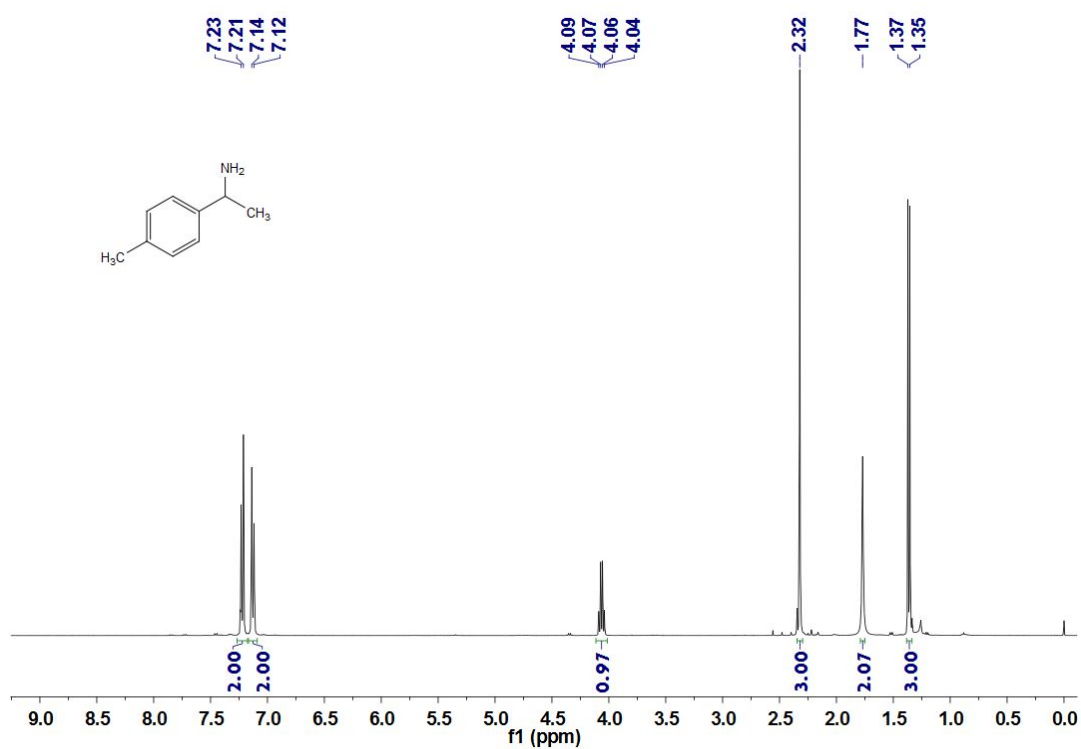

<sup>1</sup>H NMR of 1-(4-methylphenyl)ethan-1-amine

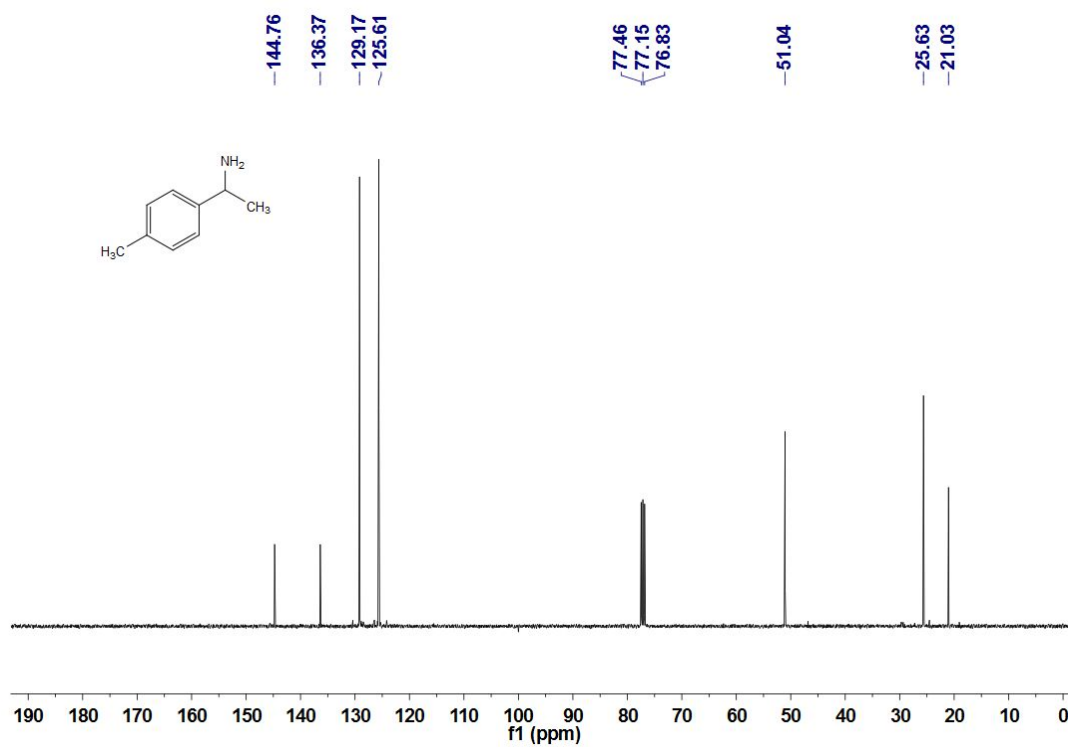

<sup>13</sup>C NMR of 1-(4-methylphenyl)ethanamine

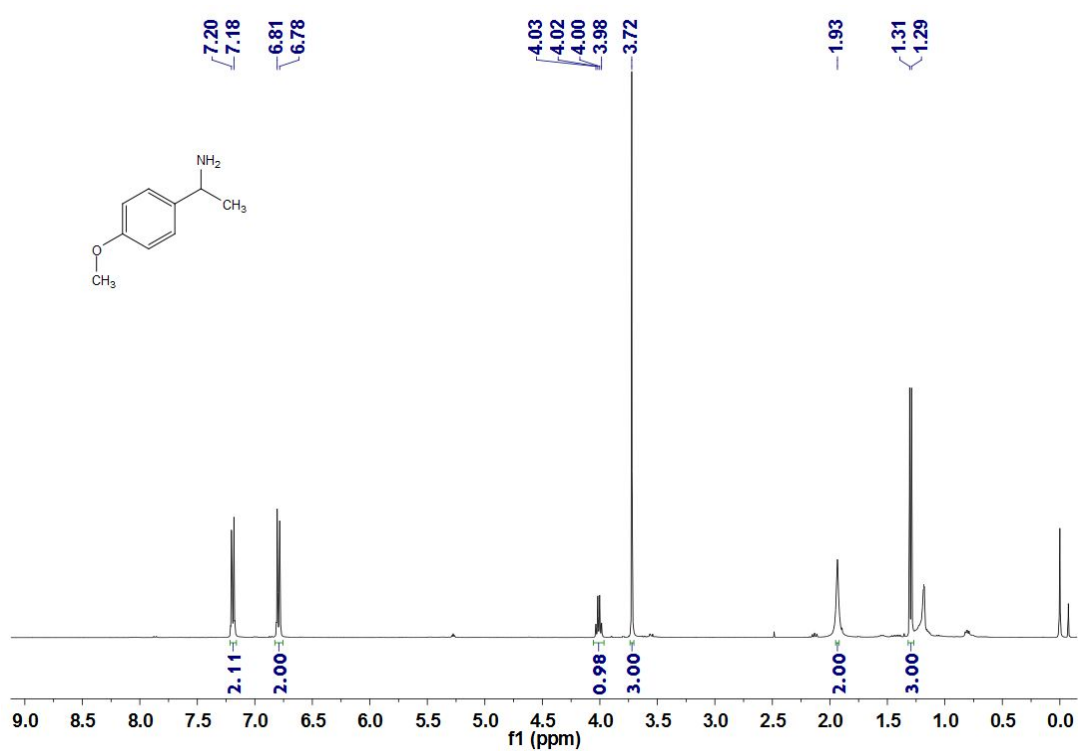

<sup>1</sup>H NMR of 1-(4-methoxyphenyl)ethanamine

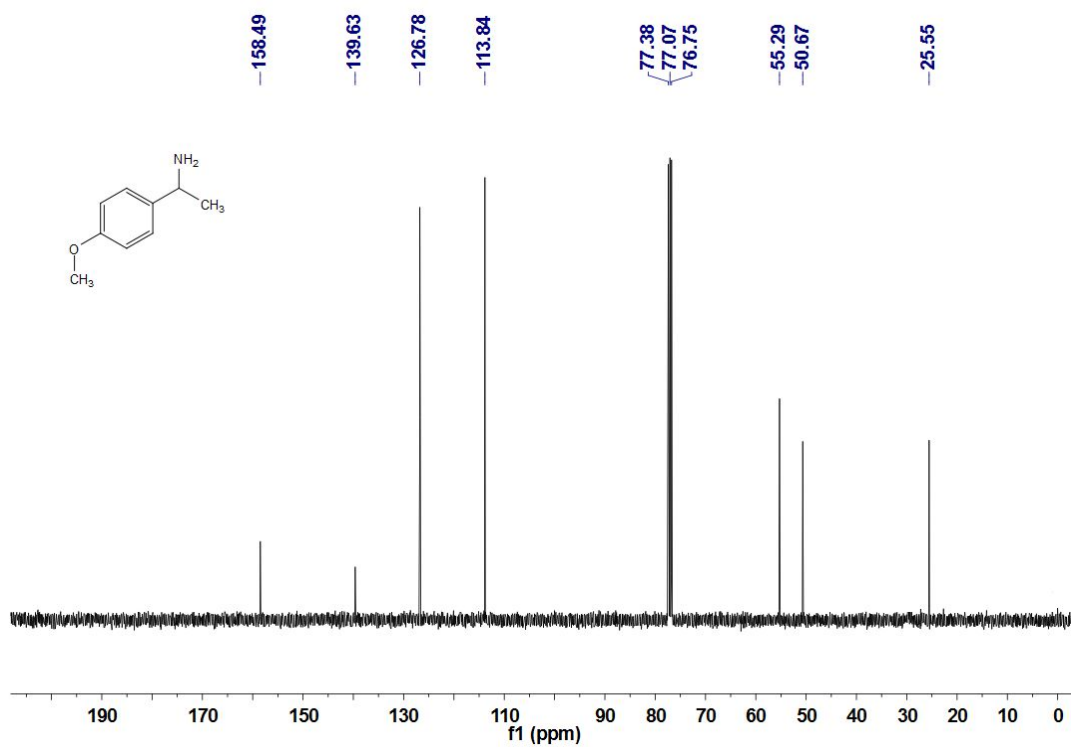

<sup>13</sup>C NMR of 1-(4-methoxyphenyl)ethan-1-amine

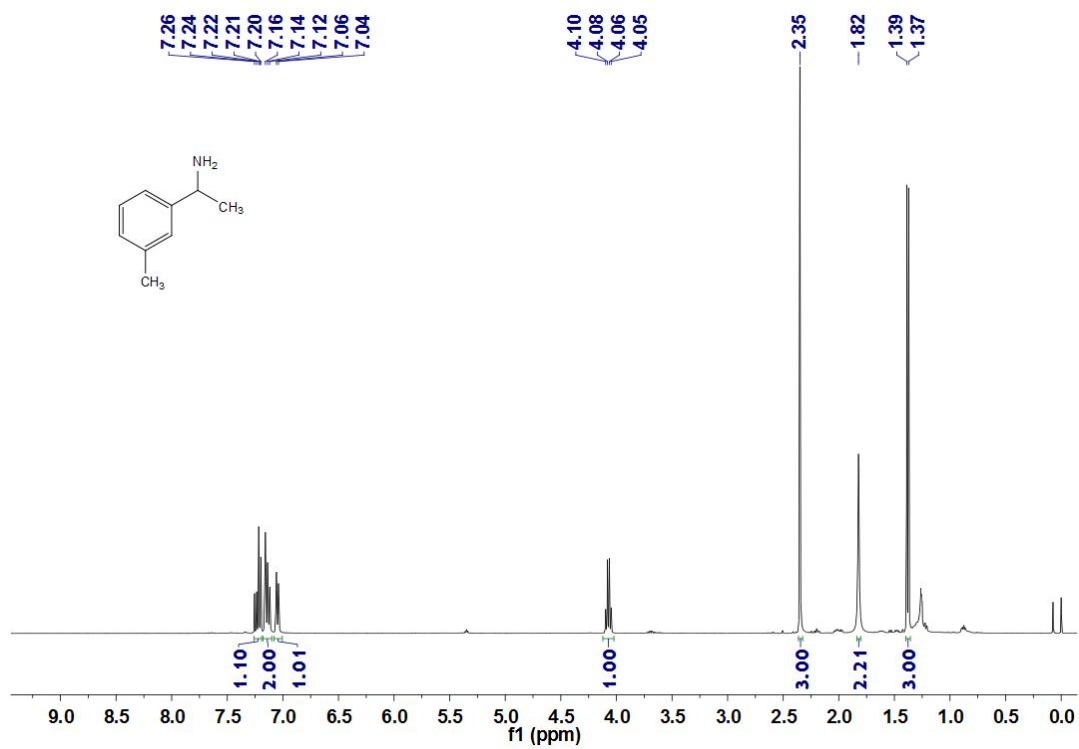

<sup>1</sup>H NMR of 1-(3-methylphenyl)ethan-1-amine



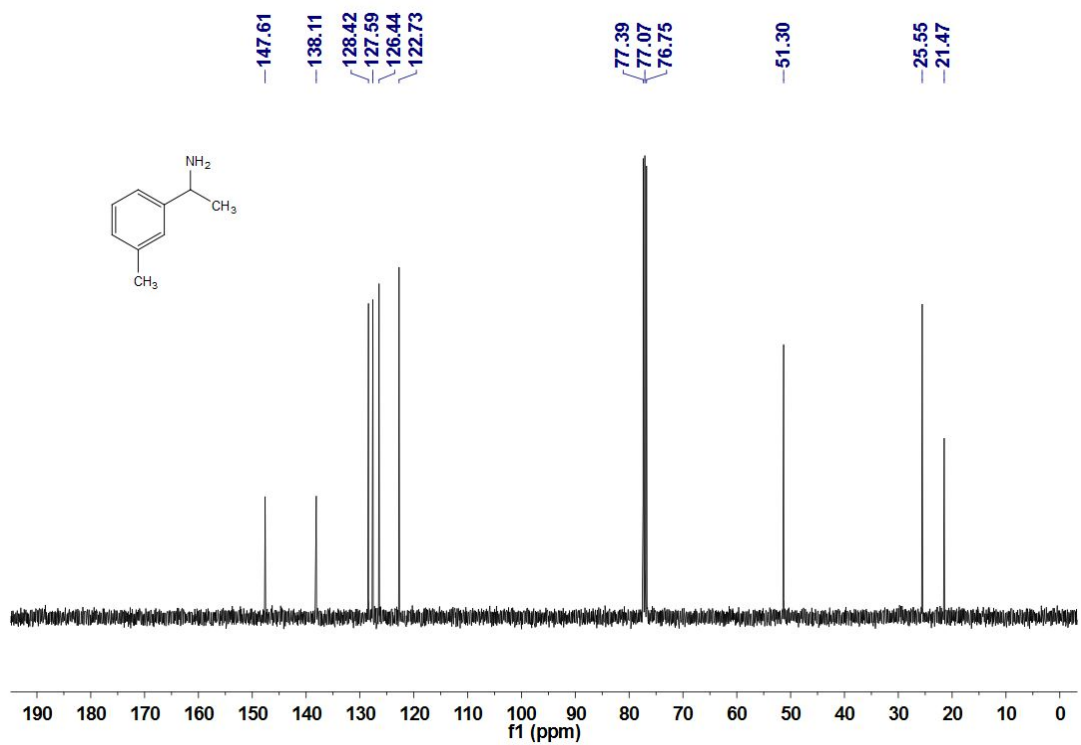

<sup>13</sup>C NMR of 1-(3-methylphenyl)ethan-1-amine

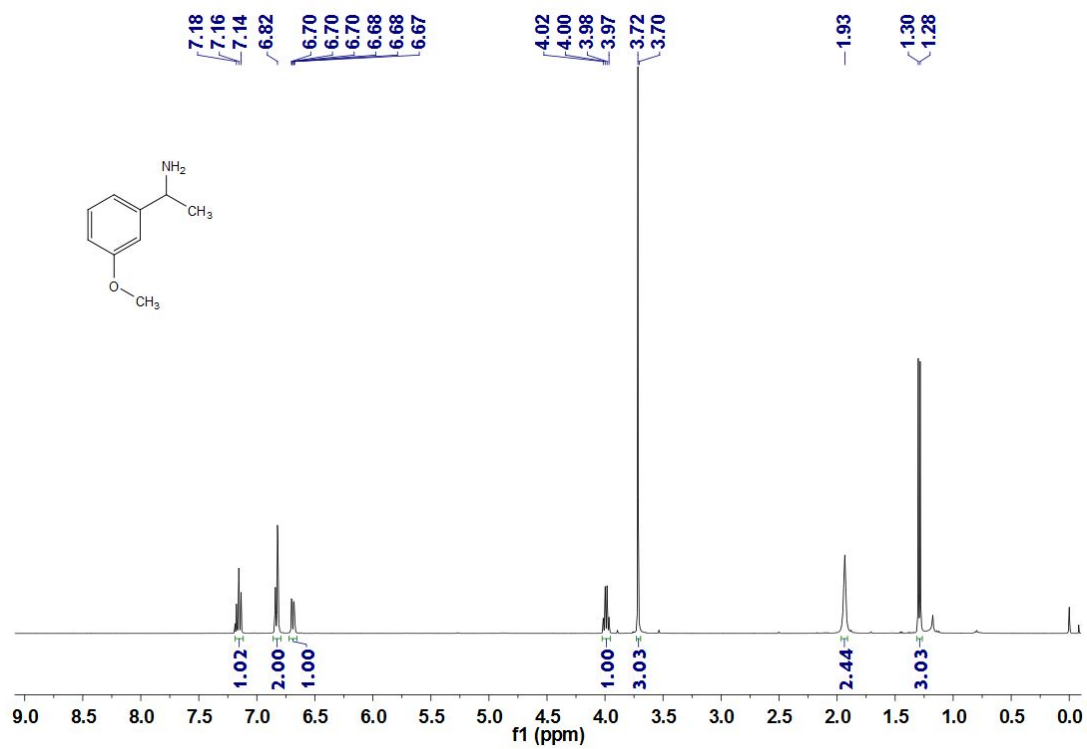

<sup>1</sup>H NMR of 1-(3-methoxyphenyl)ethan-1-amine

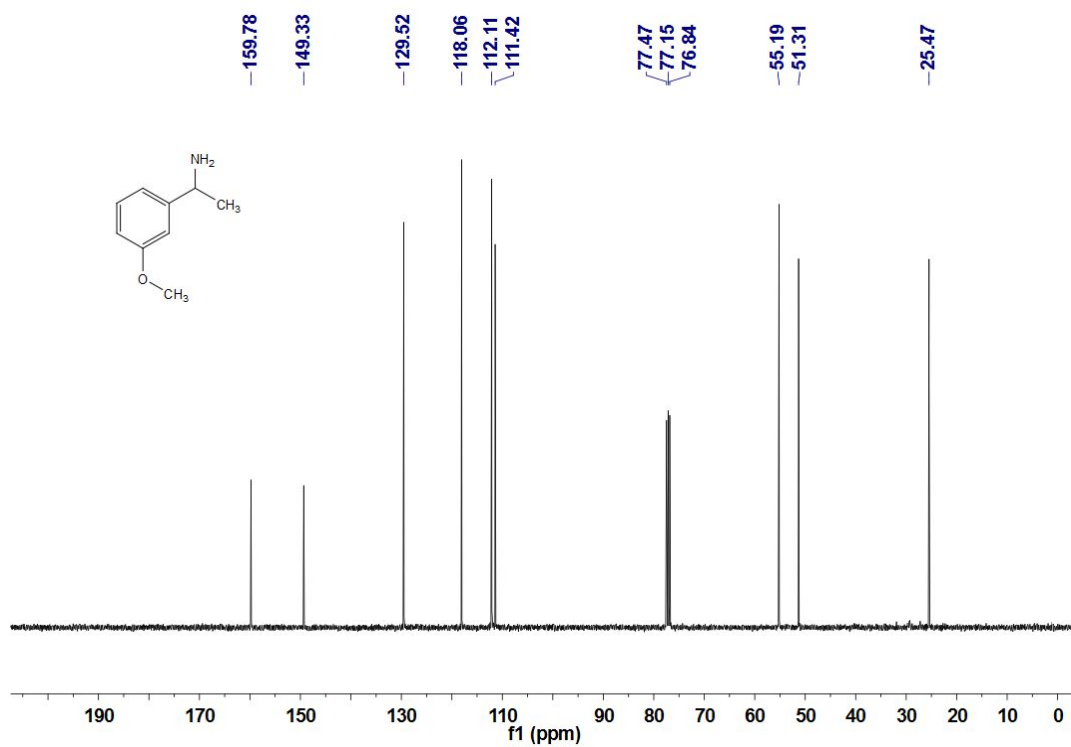

<sup>13</sup>C NMR of 1-(3-methoxyphenyl)ethylamine

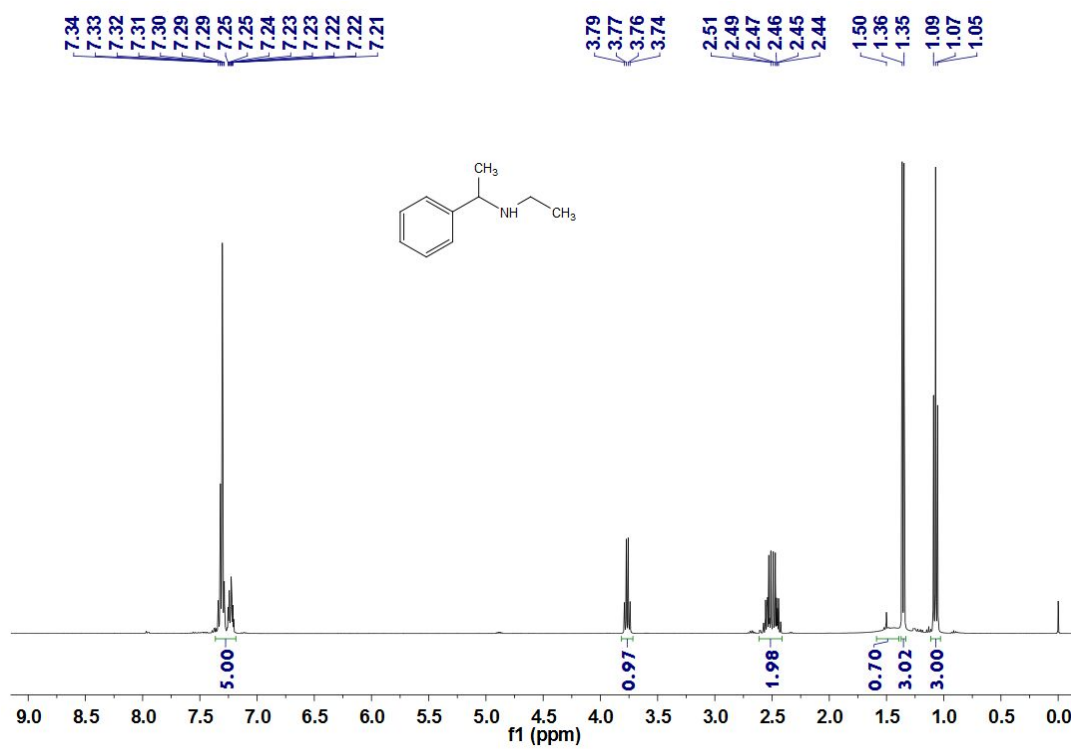

<sup>1</sup>H NMR of N-ethyl-1-phenethylamine

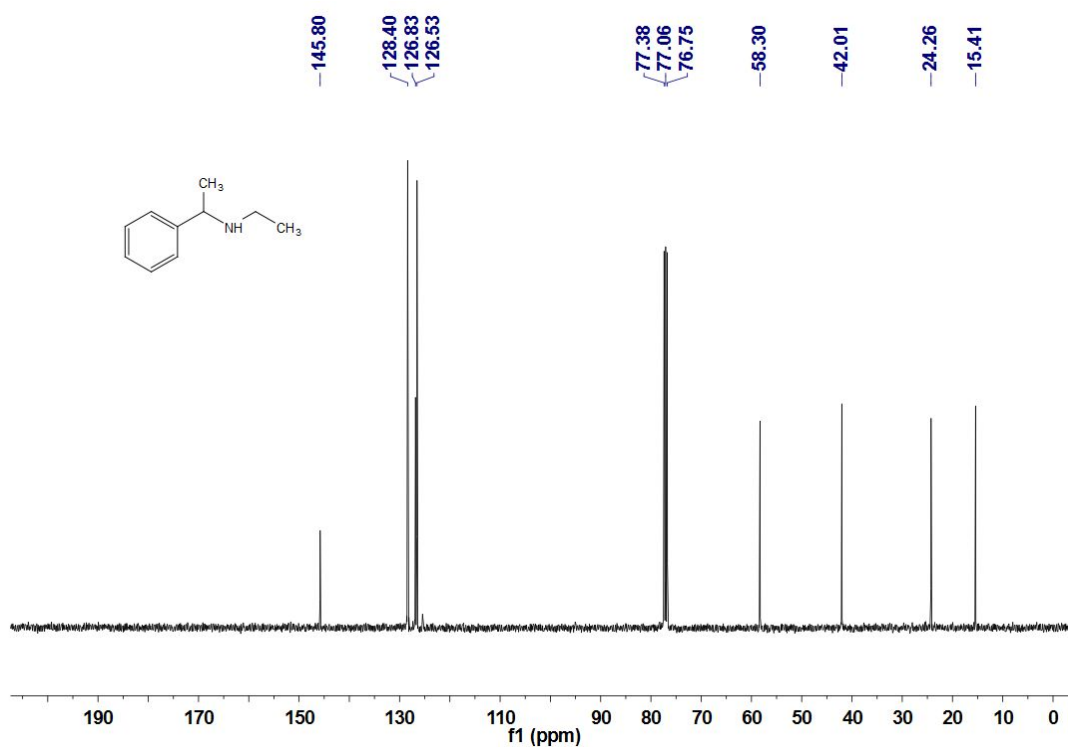

<sup>13</sup>C NMR of N-ethyl-1-phenethylamine

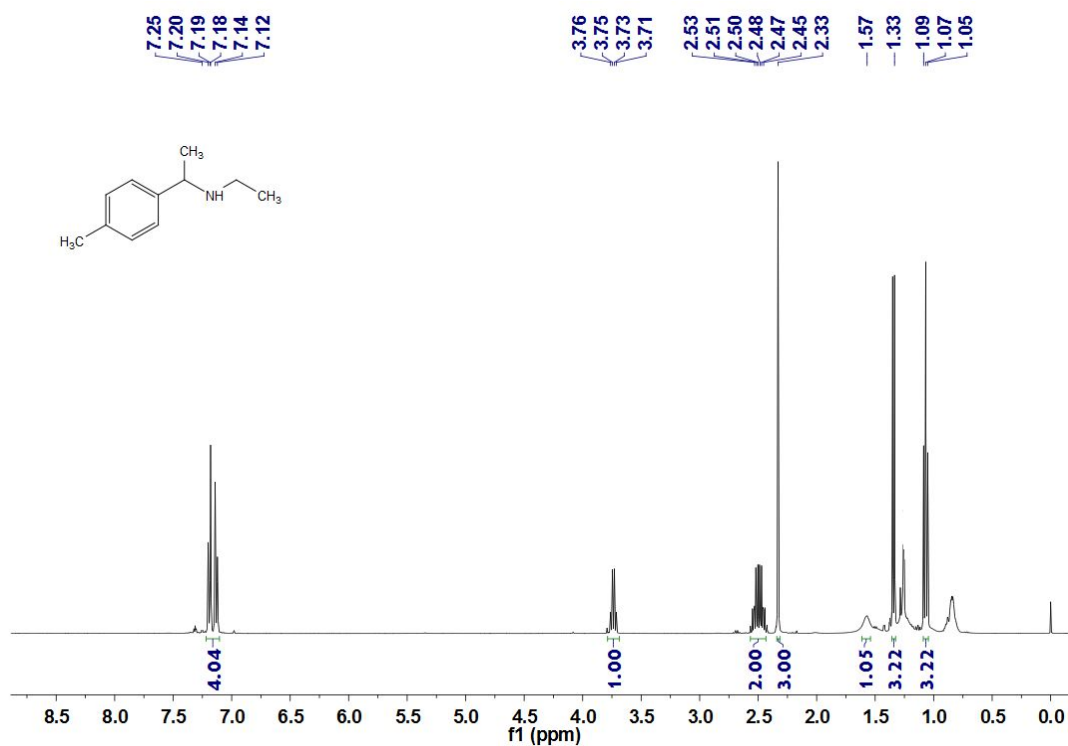

<sup>1</sup>H NMR of N-ethyl-1-(4-methylphenyl)ethylamine

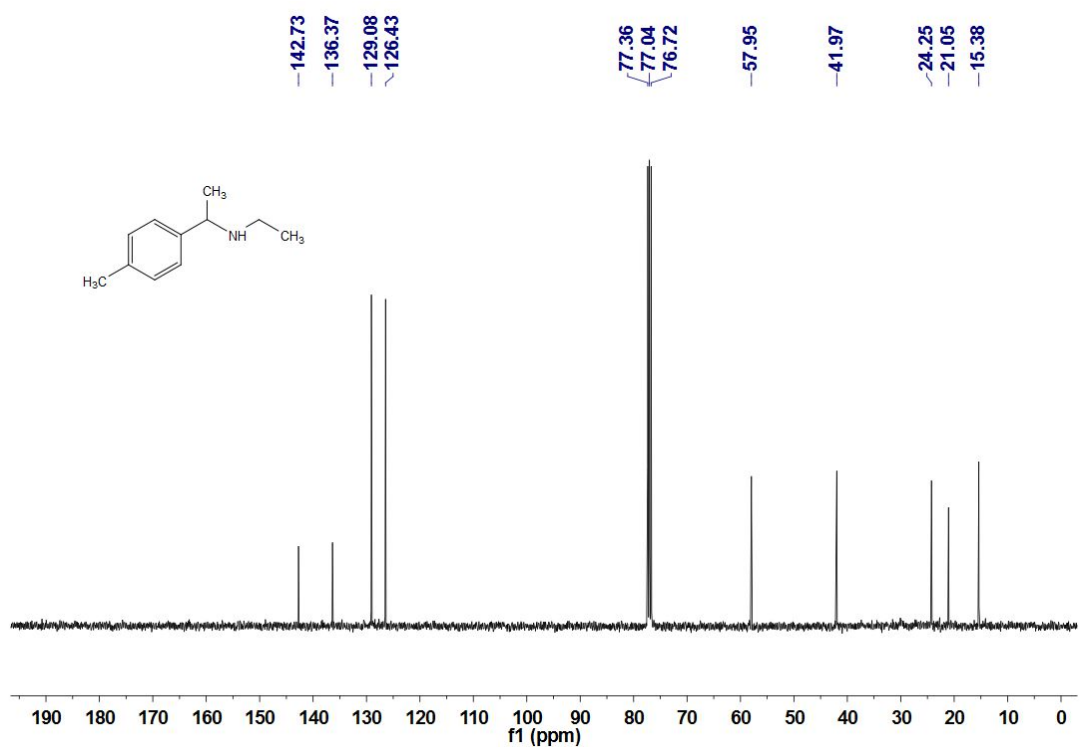

<sup>13</sup>C NMR of N-ethyl-1-(4-methylphenyl)ethanamine

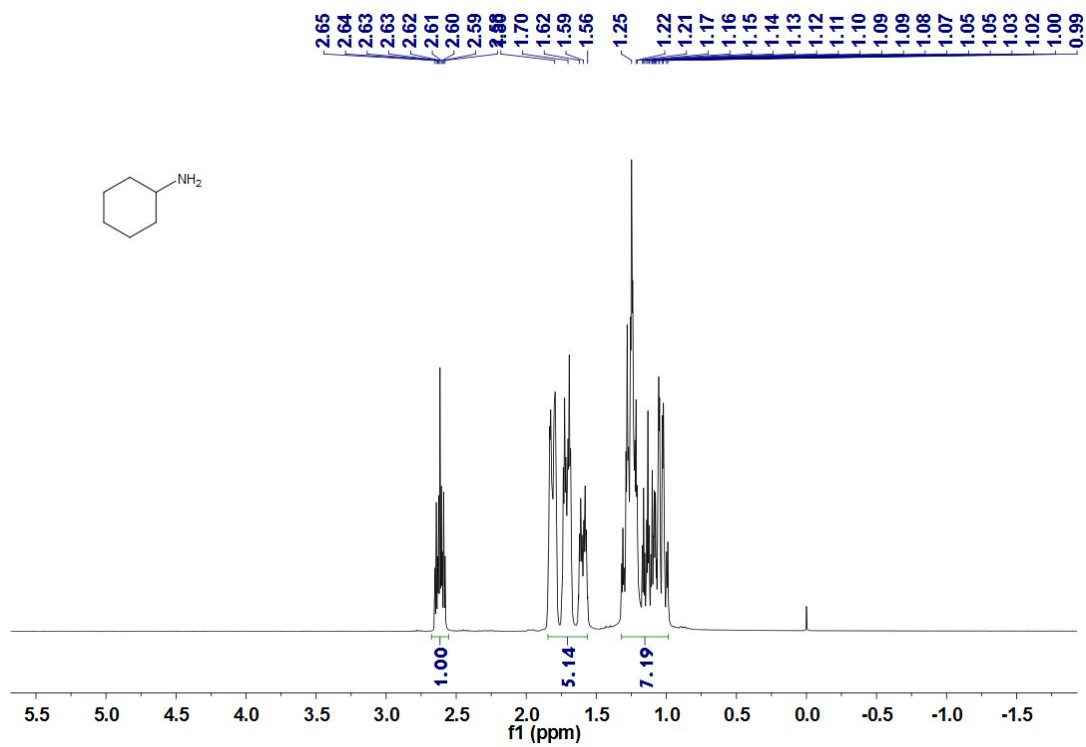

<sup>1</sup>H NMR of cyclohexylamine

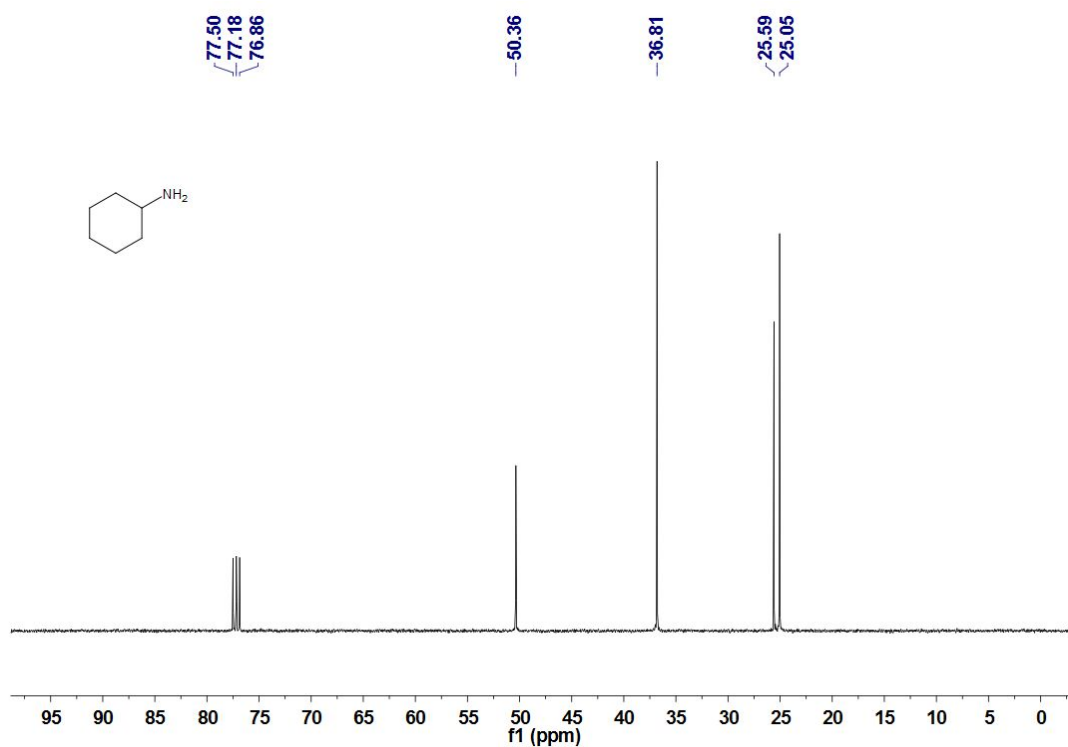

$^{13}\text{C}$  NMR of cyclohexylamine

## 15. References

- (1) Pouramiri, B.; Kermani, E. T. Efficient, Three-Component Synthesis of 1-Aryl-2,3-Dihydro-3-Phenyl-1H-Naphth[1,2-e][1,3]Oxazines Derivatives, Using  $\text{LaCl}_3/\text{ClCH}_2\text{COOH}$  as an Environmentally Benign and Green Catalytic System. *Sci. Iran.* **2014**, 21, 703-707.
- (2) Korotaev, V. Y.; Sosnovskikh, V. Y.; Kutyashev, I. B.; Barkov, A. Y.; Matochkina, E. G.; Kodess, M. I. A Simple and Convenient Synthesis of 4-Methyl-3-Nitro-2-Trihalomethyl-2H-Chromenes from *N*-Unsubstituted Imines of 2-Hydroxyacetophenones and Trichloro(trifluoro)ethylidene Nitromethanes. *Tetrahedron.* **2008**, 64, 5055-5060, DOI: 10.1016/j.tet.2008.03.065.
